# Supplementary material for: Loss of REST in breast cancer promotes tumor progression through estrogen sensitization, MMP24 and CEMIP overexpression
Source: BMC Cancer. 2022 Feb 17;22:180. doi: 10.1186/s12885-022-09280-2 (PMC8851790; doi:10.1186/s12885-022-09280-2)
Supplement: Supplementary file 1 — Additional file 1. [file 12885_2022_9280_MOESM1_ESM.docx]

**Additional file 1:**

REST ChIP-sequencing datasets

| **ENCODE Experiments** |
| --- |
| | ENCFF986RRJ | | --- | | ENCFF896RCP | | ENCFF796YFZ | | ENCFF779CWH | | ENCFF713ZPE | | ENCFF706DRE | | ENCFF669XCW | | ENCFF668YET | | ENCFF540FXB | | ENCFF403CAJ | | ENCFF313CII | | ENCFF290ESJ | | ENCFF274BBE | | ENCFF208NUB | | ENCFF107EWI | | ENCFF023ZUW | |
