# Supplementary material for: Loss of REST in breast cancer promotes tumor progression through estrogen sensitization, MMP24 and CEMIP overexpression
Source: BMC Cancer. 2022 Feb 17;22:180. doi: 10.1186/s12885-022-09280-2 (PMC8851790; doi:10.1186/s12885-022-09280-2)
Supplement: Supplementary file 10 — Additional file 10. [file 12885_2022_9280_MOESM10_ESM.xlsx]

## Sheet: Sheet1
Chr	ChIP Start Loc	ChIP End Loc	Summit	Length	Scan Start Loc	Scan End Loc	Peak ID	5'(distance)	5'(Fwd_idx)	5'(Rev_idx)	5'(strand)	5'(gene)	3'(distance)	3'(Fwd_idx)	3'(Rev_idx)	3'(strand)	3'(gene)	Overlapping(gene)	# Motifs	Motifs	Motif	Chr	Strand	Dist from Summit	Conservation	Distance from TSS:35226690 [- up; + down] (MMP24)	Motif genomic cordinates	Motif extended (5p:150,3p:150)	Motif extended genomic cordinates
20	35225491	35225811	35225651	321	35224651	35226651	ENCFF896RCP.3	1003	35226654	35277000	+	MMP24	9411	35172073	35216240	+	PROCR	MMP24OS	2	TCCGGAACCCTGGGGAGAGGG,chr20,-,-710,0.74981	TCCGGAACCCTGGGGAGAGGG	chr20	-	-710	0.74981	-329	chr20:35226350-35226370	AAGAACAGTTCTAGAGGCAGGGTCCGAAGGGGTGGAACTGGAGGTCGGGGTCTGGGGGTAGCCCTGAGCAGGAGGGGGAAGAGGCTAAATCAGTAATCCTGGAGGTAGAACAACTGGATGGCCCTGGGGGAACATATCCGGGGTTGGGGGTCCGGAACCCTGGGGAGAGGGTCCTAGGGAGTGGCATTGGAGGAGAGGGGGCCTGAGAGGCAGCCTGGGGGAGGAGACTGAGGAGCGGCTCTGGGGTAAAGGCGGGGTTCGAGAGCAAGCTAAAGAAATAGCCCTGGGTCTGAGAGGGTGACTCCGGAGAGGGAGCTCTGA	chr20:35226200-35226520
20	35225491	35225811	35225651	321	35224651	35226651	ENCFF896RCP.3	1003	35226654	35277000	+	MMP24	9411	35172073	35216240	+	PROCR	MMP24OS	2	GGCAGCACCCGGGCGGGACCT,chr20,-,-958,0.72704	GGCAGCACCCGGGCGGGACCT	chr20	-	-958	0.72704	-81	chr20:35226598-35226618		chr20:35226448-35226768
20	35225582	35225858	35225720	277	35224720	35226720	ENCFF668YET.1	934	35226654	35277000	+	MMP24	9480	35172073	35216240	+	PROCR	MMP24OS	2	TCCGGAACCCTGGGGAGAGGG,chr20,-,-641,0.74981	TCCGGAACCCTGGGGAGAGGG	chr20	-	-641	0.74981	-329	chr20:35226350-35226370	AAGAACAGTTCTAGAGGCAGGGTCCGAAGGGGTGGAACTGGAGGTCGGGGTCTGGGGGTAGCCCTGAGCAGGAGGGGGAAGAGGCTAAATCAGTAATCCTGGAGGTAGAACAACTGGATGGCCCTGGGGGAACATATCCGGGGTTGGGGGTCCGGAACCCTGGGGAGAGGGTCCTAGGGAGTGGCATTGGAGGAGAGGGGGCCTGAGAGGCAGCCTGGGGGAGGAGACTGAGGAGCGGCTCTGGGGTAAAGGCGGGGTTCGAGAGCAAGCTAAAGAAATAGCCCTGGGTCTGAGAGGGTGACTCCGGAGAGGGAGCTCTGA	chr20:35226200-35226520
20	35225582	35225858	35225720	277	35224720	35226720	ENCFF668YET.1	934	35226654	35277000	+	MMP24	9480	35172073	35216240	+	PROCR	MMP24OS	2	GGCAGCACCCGGGCGGGACCT,chr20,-,-889,0.72704	GGCAGCACCCGGGCGGGACCT	chr20	-	-889	0.72704	-81	chr20:35226598-35226618		chr20:35226448-35226768
20	35226263	35226553	35226408	291	35225408	35227408	ENCFF669XCW.2	246	35226654	35277000	+	MMP24	10168	35172073	35216240	+	PROCR	MMP24OS	4	TTCAGCACCGCGGACAGGGGC,chr20,+,-797,0.95263	TTCAGCACCGCGGACAGGGGC	chr20	+	-797	0.95263	515	chr20:35227194-35227214	GGCACCGGGGACGGGCCTGGGCCGGGCCGCACCTACTGCCGAGGTCGCGGAGGCGGCGCGCCGGGGGTCCGCGCCTTGGGTCCGGGCTGGCGCGGCCCAGGGCGGGGGCTGGGGAGGGCCTCGCCGAGGGCCGCCGAGGCCGGGAGCTGCTTCAGCACCGCGGACAGGGGCAGCGGGCGGGGGCCGAGCACGAGGGTCGGGTTTGTTGTGTTGGCAGTGGGGTGTGTGGCCTGCATGACTATGTGCGAGGGAAACCGTACAACGCCTCGGAGTAAATAGTAAGCGCAGCCAGTCTGTTGTGGGTTGGGAGAAGAAACCGAG	chr20:35227044-35227364
20	35226263	35226553	35226408	291	35225408	35227408	ENCFF669XCW.2	246	35226654	35277000	+	MMP24	10168	35172073	35216240	+	PROCR	MMP24OS	4	GGCGGCACCGGGGACGGGCCT,chr20,+,-644,0.75445	GGCGGCACCGGGGACGGGCCT	chr20	+	-644	0.75445	362	chr20:35227041-35227061	GGCGGCGGCGGCGGCGGCGGGGGCAGGGAACCGGGCAGCGGTGGCGGTGGCGGTGGCGCGGGCGGACGAGGCGGAGGCGCCCTTCGCCGGGCAGGTGGGGCTGGCGCGCGGGGCCGGGGCGCGGGCTCGGGGCATCCGGGCAGGGCGGGGGGCGGCACCGGGGACGGGCCTGGGCCGGGCCGCACCTACTGCCGAGGTCGCGGAGGCGGCGCGCCGGGGGTCCGCGCCTTGGGTCCGGGCTGGCGCGGCCCAGGGCGGGGGCTGGGGAGGGCCTCGCCGAGGGCCGCCGAGGCCGGGAGCTGCTTCAGCACCGCGGACAGG	chr20:35226891-35227211
20	35226263	35226553	35226408	291	35225408	35227408	ENCFF669XCW.2	246	35226654	35277000	+	MMP24	10168	35172073	35216240	+	PROCR	MMP24OS	4	TCCGGAACCCTGGGGAGAGGG,chr20,-,47,0.74981	TCCGGAACCCTGGGGAGAGGG	chr20	-	47	0.74981	-329	chr20:35226350-35226370	AAGAACAGTTCTAGAGGCAGGGTCCGAAGGGGTGGAACTGGAGGTCGGGGTCTGGGGGTAGCCCTGAGCAGGAGGGGGAAGAGGCTAAATCAGTAATCCTGGAGGTAGAACAACTGGATGGCCCTGGGGGAACATATCCGGGGTTGGGGGTCCGGAACCCTGGGGAGAGGGTCCTAGGGAGTGGCATTGGAGGAGAGGGGGCCTGAGAGGCAGCCTGGGGGAGGAGACTGAGGAGCGGCTCTGGGGTAAAGGCGGGGTTCGAGAGCAAGCTAAAGAAATAGCCCTGGGTCTGAGAGGGTGACTCCGGAGAGGGAGCTCTGA	chr20:35226200-35226520
20	35226263	35226553	35226408	291	35225408	35227408	ENCFF669XCW.2	246	35226654	35277000	+	MMP24	10168	35172073	35216240	+	PROCR	MMP24OS	4	GGCAGCACCCGGGCGGGACCT,chr20,-,-201,0.72704	GGCAGCACCCGGGCGGGACCT	chr20	-	-201	0.72704	-81	chr20:35226598-35226618	CGCGGCGCGGCCGCCCCGGCTCCTCGGCATCCCGGCGGCGGGGCCCGCGCCCGGCCCGCCTGCCTTCGCCGCCGCCGCCGCCGCCTCGGCCGCCAGCGCGCCCCCGCCTCCGCGCGCCCCGCCCCGGTGGGGGGCGGCCGGGGGCGCGGGGGCAGCACCCGGGCGGGACCTGCGAGGGCAGTGGCTCCCCGACCAGCCCTGGGGCAGGGGCCGCGGAGCGGCGCTGGGGAGGGGGTTGCAGAGGCTAAAAGAACAGTTCTAGAGGCAGGGTCCGAAGGGGTGGAACTGGAGGTCGGGGTCTGGGGGTAGCCCTGAGCAGGA	chr20:35226448-35226768
20	35226295	35226551	35226423	257	35225423	35227423	ENCFF403CAJ.1	231	35226654	35277000	+	MMP24	10183	35172073	35216240	+	PROCR	MMP24OS	4	TTCAGCACCGCGGACAGGGGC,chr20,+,-782,0.95263	TTCAGCACCGCGGACAGGGGC	chr20	+	-782	0.95263	515	chr20:35227194-35227214	GGCACCGGGGACGGGCCTGGGCCGGGCCGCACCTACTGCCGAGGTCGCGGAGGCGGCGCGCCGGGGGTCCGCGCCTTGGGTCCGGGCTGGCGCGGCCCAGGGCGGGGGCTGGGGAGGGCCTCGCCGAGGGCCGCCGAGGCCGGGAGCTGCTTCAGCACCGCGGACAGGGGCAGCGGGCGGGGGCCGAGCACGAGGGTCGGGTTTGTTGTGTTGGCAGTGGGGTGTGTGGCCTGCATGACTATGTGCGAGGGAAACCGTACAACGCCTCGGAGTAAATAGTAAGCGCAGCCAGTCTGTTGTGGGTTGGGAGAAGAAACCGAG	chr20:35227044-35227364
20	35226295	35226551	35226423	257	35225423	35227423	ENCFF403CAJ.1	231	35226654	35277000	+	MMP24	10183	35172073	35216240	+	PROCR	MMP24OS	4	GGCGGCACCGGGGACGGGCCT,chr20,+,-629,0.75445	GGCGGCACCGGGGACGGGCCT	chr20	+	-629	0.75445	362	chr20:35227041-35227061	GGCGGCGGCGGCGGCGGCGGGGGCAGGGAACCGGGCAGCGGTGGCGGTGGCGGTGGCGCGGGCGGACGAGGCGGAGGCGCCCTTCGCCGGGCAGGTGGGGCTGGCGCGCGGGGCCGGGGCGCGGGCTCGGGGCATCCGGGCAGGGCGGGGGGCGGCACCGGGGACGGGCCTGGGCCGGGCCGCACCTACTGCCGAGGTCGCGGAGGCGGCGCGCCGGGGGTCCGCGCCTTGGGTCCGGGCTGGCGCGGCCCAGGGCGGGGGCTGGGGAGGGCCTCGCCGAGGGCCGCCGAGGCCGGGAGCTGCTTCAGCACCGCGGACAGG	chr20:35226891-35227211
20	35226295	35226551	35226423	257	35225423	35227423	ENCFF403CAJ.1	231	35226654	35277000	+	MMP24	10183	35172073	35216240	+	PROCR	MMP24OS	4	TCCGGAACCCTGGGGAGAGGG,chr20,-,62,0.74981	TCCGGAACCCTGGGGAGAGGG	chr20	-	62	0.74981	-329	chr20:35226350-35226370	AAGAACAGTTCTAGAGGCAGGGTCCGAAGGGGTGGAACTGGAGGTCGGGGTCTGGGGGTAGCCCTGAGCAGGAGGGGGAAGAGGCTAAATCAGTAATCCTGGAGGTAGAACAACTGGATGGCCCTGGGGGAACATATCCGGGGTTGGGGGTCCGGAACCCTGGGGAGAGGGTCCTAGGGAGTGGCATTGGAGGAGAGGGGGCCTGAGAGGCAGCCTGGGGGAGGAGACTGAGGAGCGGCTCTGGGGTAAAGGCGGGGTTCGAGAGCAAGCTAAAGAAATAGCCCTGGGTCTGAGAGGGTGACTCCGGAGAGGGAGCTCTGA	chr20:35226200-35226520
20	35226295	35226551	35226423	257	35225423	35227423	ENCFF403CAJ.1	231	35226654	35277000	+	MMP24	10183	35172073	35216240	+	PROCR	MMP24OS	4	GGCAGCACCCGGGCGGGACCT,chr20,-,-186,0.72704	GGCAGCACCCGGGCGGGACCT	chr20	-	-186	0.72704	-81	chr20:35226598-35226618	CGCGGCGCGGCCGCCCCGGCTCCTCGGCATCCCGGCGGCGGGGCCCGCGCCCGGCCCGCCTGCCTTCGCCGCCGCCGCCGCCGCCTCGGCCGCCAGCGCGCCCCCGCCTCCGCGCGCCCCGCCCCGGTGGGGGGCGGCCGGGGGCGCGGGGGCAGCACCCGGGCGGGACCTGCGAGGGCAGTGGCTCCCCGACCAGCCCTGGGGCAGGGGCCGCGGAGCGGCGCTGGGGAGGGGGTTGCAGAGGCTAAAAGAACAGTTCTAGAGGCAGGGTCCGAAGGGGTGGAACTGGAGGTCGGGGTCTGGGGGTAGCCCTGAGCAGGA	chr20:35226448-35226768
20	35226467	35226757	35226612	291	35225612	35227612	ENCFF669XCW.1	42	35226654	35277000	+	MMP24	10372	35172073	35216240	+	PROCR	MMP24OS	5	TTCAGCACCGCGGACAGGGGC,chr20,+,-593,0.95263	TTCAGCACCGCGGACAGGGGC	chr20	+	-593	0.95263	515	chr20:35227194-35227214	GGCACCGGGGACGGGCCTGGGCCGGGCCGCACCTACTGCCGAGGTCGCGGAGGCGGCGCGCCGGGGGTCCGCGCCTTGGGTCCGGGCTGGCGCGGCCCAGGGCGGGGGCTGGGGAGGGCCTCGCCGAGGGCCGCCGAGGCCGGGAGCTGCTTCAGCACCGCGGACAGGGGCAGCGGGCGGGGGCCGAGCACGAGGGTCGGGTTTGTTGTGTTGGCAGTGGGGTGTGTGGCCTGCATGACTATGTGCGAGGGAAACCGTACAACGCCTCGGAGTAAATAGTAAGCGCAGCCAGTCTGTTGTGGGTTGGGAGAAGAAACCGAG	chr20:35227044-35227364
20	35226467	35226757	35226612	291	35225612	35227612	ENCFF669XCW.1	42	35226654	35277000	+	MMP24	10372	35172073	35216240	+	PROCR	MMP24OS	5	GGCAGAACTAGGGCCAGCGGG,chr20,+,-882,0.78808	GGCAGAACTAGGGCCAGCGGG	chr20	+	-882	0.78808	804	chr20:35227483-35227503		chr20:35227333-35227653
20	35226467	35226757	35226612	291	35225612	35227612	ENCFF669XCW.1	42	35226654	35277000	+	MMP24	10372	35172073	35216240	+	PROCR	MMP24OS	5	GGCGGCACCGGGGACGGGCCT,chr20,+,-440,0.75445	GGCGGCACCGGGGACGGGCCT	chr20	+	-440	0.75445	362	chr20:35227041-35227061	GGCGGCGGCGGCGGCGGCGGGGGCAGGGAACCGGGCAGCGGTGGCGGTGGCGGTGGCGCGGGCGGACGAGGCGGAGGCGCCCTTCGCCGGGCAGGTGGGGCTGGCGCGCGGGGCCGGGGCGCGGGCTCGGGGCATCCGGGCAGGGCGGGGGGCGGCACCGGGGACGGGCCTGGGCCGGGCCGCACCTACTGCCGAGGTCGCGGAGGCGGCGCGCCGGGGGTCCGCGCCTTGGGTCCGGGCTGGCGCGGCCCAGGGCGGGGGCTGGGGAGGGCCTCGCCGAGGGCCGCCGAGGCCGGGAGCTGCTTCAGCACCGCGGACAGG	chr20:35226891-35227211
20	35226467	35226757	35226612	291	35225612	35227612	ENCFF669XCW.1	42	35226654	35277000	+	MMP24	10372	35172073	35216240	+	PROCR	MMP24OS	5	TCCGGAACCCTGGGGAGAGGG,chr20,-,251,0.74981	TCCGGAACCCTGGGGAGAGGG	chr20	-	251	0.74981	-329	chr20:35226350-35226370	AAGAACAGTTCTAGAGGCAGGGTCCGAAGGGGTGGAACTGGAGGTCGGGGTCTGGGGGTAGCCCTGAGCAGGAGGGGGAAGAGGCTAAATCAGTAATCCTGGAGGTAGAACAACTGGATGGCCCTGGGGGAACATATCCGGGGTTGGGGGTCCGGAACCCTGGGGAGAGGGTCCTAGGGAGTGGCATTGGAGGAGAGGGGGCCTGAGAGGCAGCCTGGGGGAGGAGACTGAGGAGCGGCTCTGGGGTAAAGGCGGGGTTCGAGAGCAAGCTAAAGAAATAGCCCTGGGTCTGAGAGGGTGACTCCGGAGAGGGAGCTCTGA	chr20:35226200-35226520
20	35226467	35226757	35226612	291	35225612	35227612	ENCFF669XCW.1	42	35226654	35277000	+	MMP24	10372	35172073	35216240	+	PROCR	MMP24OS	5	GGCAGCACCCGGGCGGGACCT,chr20,-,3,0.72704	GGCAGCACCCGGGCGGGACCT	chr20	-	3	0.72704	-81	chr20:35226598-35226618	CGCGGCGCGGCCGCCCCGGCTCCTCGGCATCCCGGCGGCGGGGCCCGCGCCCGGCCCGCCTGCCTTCGCCGCCGCCGCCGCCGCCTCGGCCGCCAGCGCGCCCCCGCCTCCGCGCGCCCCGCCCCGGTGGGGGGCGGCCGGGGGCGCGGGGGCAGCACCCGGGCGGGACCTGCGAGGGCAGTGGCTCCCCGACCAGCCCTGGGGCAGGGGCCGCGGAGCGGCGCTGGGGAGGGGGTTGCAGAGGCTAAAAGAACAGTTCTAGAGGCAGGGTCCGAAGGGGTGGAACTGGAGGTCGGGGTCTGGGGGTAGCCCTGAGCAGGA	chr20:35226448-35226768
20	35227069	35227349	35227209	281	35226209	35228209	ENCFF023ZUW.1	79845	35115357	35147364	-	EDEM2	10969	35172073	35216240	+	PROCR	MMP24	5	TTCAGCACCGCGGACAGGGGC,chr20,+,4,0.95263	TTCAGCACCGCGGACAGGGGC	chr20	+	4	0.95263	515	chr20:35227194-35227214	GGCACCGGGGACGGGCCTGGGCCGGGCCGCACCTACTGCCGAGGTCGCGGAGGCGGCGCGCCGGGGGTCCGCGCCTTGGGTCCGGGCTGGCGCGGCCCAGGGCGGGGGCTGGGGAGGGCCTCGCCGAGGGCCGCCGAGGCCGGGAGCTGCTTCAGCACCGCGGACAGGGGCAGCGGGCGGGGGCCGAGCACGAGGGTCGGGTTTGTTGTGTTGGCAGTGGGGTGTGTGGCCTGCATGACTATGTGCGAGGGAAACCGTACAACGCCTCGGAGTAAATAGTAAGCGCAGCCAGTCTGTTGTGGGTTGGGAGAAGAAACCGAG	chr20:35227044-35227364
20	35227069	35227349	35227209	281	35226209	35228209	ENCFF023ZUW.1	79845	35115357	35147364	-	EDEM2	10969	35172073	35216240	+	PROCR	MMP24	5	GGCAGAACTAGGGCCAGCGGG,chr20,+,-285,0.78808	GGCAGAACTAGGGCCAGCGGG	chr20	+	-285	0.78808	804	chr20:35227483-35227503	CAGTCTGTTGTGGGTTGGGAGAAGAAACCGAGGATGTTCAAGCTGGAGAAGGGGGAGGGGGAGGGCGGAGGAAGGACTCGATCACTGTCTTCGTAGCTGAAGGGCTGTCAGGTGGAGGTAGGATAGACTTGTTCTAGCTTGGCCCCACAGGGCAGAACTAGGGCCAGCGGGAGTGGGGGTTGCAAGAAGACAAATTTGGGCTCGATATAGGAAGAAGTTTGTAACAATTGGAGCTGCTCAACCAGCTTAGGAGGCGGCGAGCTGCTCATCACTGGCATGTGCAAGTAAAAGCTCTCGGAGGGGATTGGATGGAGGCATGCA	chr20:35227333-35227653
20	35227069	35227349	35227209	281	35226209	35228209	ENCFF023ZUW.1	79845	35115357	35147364	-	EDEM2	10969	35172073	35216240	+	PROCR	MMP24	5	GGCGGCACCGGGGACGGGCCT,chr20,+,157,0.75445	GGCGGCACCGGGGACGGGCCT	chr20	+	157	0.75445	362	chr20:35227041-35227061	GGCGGCGGCGGCGGCGGCGGGGGCAGGGAACCGGGCAGCGGTGGCGGTGGCGGTGGCGCGGGCGGACGAGGCGGAGGCGCCCTTCGCCGGGCAGGTGGGGCTGGCGCGCGGGGCCGGGGCGCGGGCTCGGGGCATCCGGGCAGGGCGGGGGGCGGCACCGGGGACGGGCCTGGGCCGGGCCGCACCTACTGCCGAGGTCGCGGAGGCGGCGCGCCGGGGGTCCGCGCCTTGGGTCCGGGCTGGCGCGGCCCAGGGCGGGGGCTGGGGAGGGCCTCGCCGAGGGCCGCCGAGGCCGGGAGCTGCTTCAGCACCGCGGACAGG	chr20:35226891-35227211
20	35227069	35227349	35227209	281	35226209	35228209	ENCFF023ZUW.1	79845	35115357	35147364	-	EDEM2	10969	35172073	35216240	+	PROCR	MMP24	5	TCCGGAACCCTGGGGAGAGGG,chr20,-,848,0.74981	TCCGGAACCCTGGGGAGAGGG	chr20	-	848	0.74981	-329	chr20:35226350-35226370		chr20:35226200-35226520
20	35227069	35227349	35227209	281	35226209	35228209	ENCFF023ZUW.1	79845	35115357	35147364	-	EDEM2	10969	35172073	35216240	+	PROCR	MMP24	5	GGCAGCACCCGGGCGGGACCT,chr20,-,600,0.72704	GGCAGCACCCGGGCGGGACCT	chr20	-	600	0.72704	-81	chr20:35226598-35226618	CGCGGCGCGGCCGCCCCGGCTCCTCGGCATCCCGGCGGCGGGGCCCGCGCCCGGCCCGCCTGCCTTCGCCGCCGCCGCCGCCGCCTCGGCCGCCAGCGCGCCCCCGCCTCCGCGCGCCCCGCCCCGGTGGGGGGCGGCCGGGGGCGCGGGGGCAGCACCCGGGCGGGACCTGCGAGGGCAGTGGCTCCCCGACCAGCCCTGGGGCAGGGGCCGCGGAGCGGCGCTGGGGAGGGGGTTGCAGAGGCTAAAAGAACAGTTCTAGAGGCAGGGTCCGAAGGGGTGGAACTGGAGGTCGGGGTCTGGGGGTAGCCCTGAGCAGGA	chr20:35226448-35226768
20	35227074	35227375	35227213	302	35226213	35228213	ENCFF274BBE.1	79849	35115357	35147364	-	EDEM2	10973	35172073	35216240	+	PROCR	MMP24	5	TTCAGCACCGCGGACAGGGGC,chr20,+,8,0.95263	TTCAGCACCGCGGACAGGGGC	chr20	+	8	0.95263	515	chr20:35227194-35227214	GGCACCGGGGACGGGCCTGGGCCGGGCCGCACCTACTGCCGAGGTCGCGGAGGCGGCGCGCCGGGGGTCCGCGCCTTGGGTCCGGGCTGGCGCGGCCCAGGGCGGGGGCTGGGGAGGGCCTCGCCGAGGGCCGCCGAGGCCGGGAGCTGCTTCAGCACCGCGGACAGGGGCAGCGGGCGGGGGCCGAGCACGAGGGTCGGGTTTGTTGTGTTGGCAGTGGGGTGTGTGGCCTGCATGACTATGTGCGAGGGAAACCGTACAACGCCTCGGAGTAAATAGTAAGCGCAGCCAGTCTGTTGTGGGTTGGGAGAAGAAACCGAG	chr20:35227044-35227364
20	35227074	35227375	35227213	302	35226213	35228213	ENCFF274BBE.1	79849	35115357	35147364	-	EDEM2	10973	35172073	35216240	+	PROCR	MMP24	5	GGCAGAACTAGGGCCAGCGGG,chr20,+,-281,0.78808	GGCAGAACTAGGGCCAGCGGG	chr20	+	-281	0.78808	804	chr20:35227483-35227503	CAGTCTGTTGTGGGTTGGGAGAAGAAACCGAGGATGTTCAAGCTGGAGAAGGGGGAGGGGGAGGGCGGAGGAAGGACTCGATCACTGTCTTCGTAGCTGAAGGGCTGTCAGGTGGAGGTAGGATAGACTTGTTCTAGCTTGGCCCCACAGGGCAGAACTAGGGCCAGCGGGAGTGGGGGTTGCAAGAAGACAAATTTGGGCTCGATATAGGAAGAAGTTTGTAACAATTGGAGCTGCTCAACCAGCTTAGGAGGCGGCGAGCTGCTCATCACTGGCATGTGCAAGTAAAAGCTCTCGGAGGGGATTGGATGGAGGCATGCA	chr20:35227333-35227653
20	35227074	35227375	35227213	302	35226213	35228213	ENCFF274BBE.1	79849	35115357	35147364	-	EDEM2	10973	35172073	35216240	+	PROCR	MMP24	5	GGCGGCACCGGGGACGGGCCT,chr20,+,161,0.75445	GGCGGCACCGGGGACGGGCCT	chr20	+	161	0.75445	362	chr20:35227041-35227061	GGCGGCGGCGGCGGCGGCGGGGGCAGGGAACCGGGCAGCGGTGGCGGTGGCGGTGGCGCGGGCGGACGAGGCGGAGGCGCCCTTCGCCGGGCAGGTGGGGCTGGCGCGCGGGGCCGGGGCGCGGGCTCGGGGCATCCGGGCAGGGCGGGGGGCGGCACCGGGGACGGGCCTGGGCCGGGCCGCACCTACTGCCGAGGTCGCGGAGGCGGCGCGCCGGGGGTCCGCGCCTTGGGTCCGGGCTGGCGCGGCCCAGGGCGGGGGCTGGGGAGGGCCTCGCCGAGGGCCGCCGAGGCCGGGAGCTGCTTCAGCACCGCGGACAGG	chr20:35226891-35227211
20	35227074	35227375	35227213	302	35226213	35228213	ENCFF274BBE.1	79849	35115357	35147364	-	EDEM2	10973	35172073	35216240	+	PROCR	MMP24	5	TCCGGAACCCTGGGGAGAGGG,chr20,-,852,0.74981	TCCGGAACCCTGGGGAGAGGG	chr20	-	852	0.74981	-329	chr20:35226350-35226370		chr20:35226200-35226520
20	35227074	35227375	35227213	302	35226213	35228213	ENCFF274BBE.1	79849	35115357	35147364	-	EDEM2	10973	35172073	35216240	+	PROCR	MMP24	5	GGCAGCACCCGGGCGGGACCT,chr20,-,604,0.72704	GGCAGCACCCGGGCGGGACCT	chr20	-	604	0.72704	-81	chr20:35226598-35226618	CGCGGCGCGGCCGCCCCGGCTCCTCGGCATCCCGGCGGCGGGGCCCGCGCCCGGCCCGCCTGCCTTCGCCGCCGCCGCCGCCGCCTCGGCCGCCAGCGCGCCCCCGCCTCCGCGCGCCCCGCCCCGGTGGGGGGCGGCCGGGGGCGCGGGGGCAGCACCCGGGCGGGACCTGCGAGGGCAGTGGCTCCCCGACCAGCCCTGGGGCAGGGGCCGCGGAGCGGCGCTGGGGAGGGGGTTGCAGAGGCTAAAAGAACAGTTCTAGAGGCAGGGTCCGAAGGGGTGGAACTGGAGGTCGGGGTCTGGGGGTAGCCCTGAGCAGGA	chr20:35226448-35226768
20	35227147	35227271	35227218	125	35226218	35228218	ENCFF796YFZ.1	79854	35115357	35147364	-	EDEM2	10978	35172073	35216240	+	PROCR	MMP24	5	TTCAGCACCGCGGACAGGGGC,chr20,+,13,0.95263	TTCAGCACCGCGGACAGGGGC	chr20	+	13	0.95263	515	chr20:35227194-35227214	GGCACCGGGGACGGGCCTGGGCCGGGCCGCACCTACTGCCGAGGTCGCGGAGGCGGCGCGCCGGGGGTCCGCGCCTTGGGTCCGGGCTGGCGCGGCCCAGGGCGGGGGCTGGGGAGGGCCTCGCCGAGGGCCGCCGAGGCCGGGAGCTGCTTCAGCACCGCGGACAGGGGCAGCGGGCGGGGGCCGAGCACGAGGGTCGGGTTTGTTGTGTTGGCAGTGGGGTGTGTGGCCTGCATGACTATGTGCGAGGGAAACCGTACAACGCCTCGGAGTAAATAGTAAGCGCAGCCAGTCTGTTGTGGGTTGGGAGAAGAAACCGAG	chr20:35227044-35227364
20	35227147	35227271	35227218	125	35226218	35228218	ENCFF796YFZ.1	79854	35115357	35147364	-	EDEM2	10978	35172073	35216240	+	PROCR	MMP24	5	GGCAGAACTAGGGCCAGCGGG,chr20,+,-276,0.78808	GGCAGAACTAGGGCCAGCGGG	chr20	+	-276	0.78808	804	chr20:35227483-35227503	CAGTCTGTTGTGGGTTGGGAGAAGAAACCGAGGATGTTCAAGCTGGAGAAGGGGGAGGGGGAGGGCGGAGGAAGGACTCGATCACTGTCTTCGTAGCTGAAGGGCTGTCAGGTGGAGGTAGGATAGACTTGTTCTAGCTTGGCCCCACAGGGCAGAACTAGGGCCAGCGGGAGTGGGGGTTGCAAGAAGACAAATTTGGGCTCGATATAGGAAGAAGTTTGTAACAATTGGAGCTGCTCAACCAGCTTAGGAGGCGGCGAGCTGCTCATCACTGGCATGTGCAAGTAAAAGCTCTCGGAGGGGATTGGATGGAGGCATGCA	chr20:35227333-35227653
20	35227147	35227271	35227218	125	35226218	35228218	ENCFF796YFZ.1	79854	35115357	35147364	-	EDEM2	10978	35172073	35216240	+	PROCR	MMP24	5	GGCGGCACCGGGGACGGGCCT,chr20,+,166,0.75445	GGCGGCACCGGGGACGGGCCT	chr20	+	166	0.75445	362	chr20:35227041-35227061	GGCGGCGGCGGCGGCGGCGGGGGCAGGGAACCGGGCAGCGGTGGCGGTGGCGGTGGCGCGGGCGGACGAGGCGGAGGCGCCCTTCGCCGGGCAGGTGGGGCTGGCGCGCGGGGCCGGGGCGCGGGCTCGGGGCATCCGGGCAGGGCGGGGGGCGGCACCGGGGACGGGCCTGGGCCGGGCCGCACCTACTGCCGAGGTCGCGGAGGCGGCGCGCCGGGGGTCCGCGCCTTGGGTCCGGGCTGGCGCGGCCCAGGGCGGGGGCTGGGGAGGGCCTCGCCGAGGGCCGCCGAGGCCGGGAGCTGCTTCAGCACCGCGGACAGG	chr20:35226891-35227211
20	35227147	35227271	35227218	125	35226218	35228218	ENCFF796YFZ.1	79854	35115357	35147364	-	EDEM2	10978	35172073	35216240	+	PROCR	MMP24	5	TCCGGAACCCTGGGGAGAGGG,chr20,-,857,0.74981	TCCGGAACCCTGGGGAGAGGG	chr20	-	857	0.74981	-329	chr20:35226350-35226370		chr20:35226200-35226520
20	35227147	35227271	35227218	125	35226218	35228218	ENCFF796YFZ.1	79854	35115357	35147364	-	EDEM2	10978	35172073	35216240	+	PROCR	MMP24	5	GGCAGCACCCGGGCGGGACCT,chr20,-,609,0.72704	GGCAGCACCCGGGCGGGACCT	chr20	-	609	0.72704	-81	chr20:35226598-35226618	CGCGGCGCGGCCGCCCCGGCTCCTCGGCATCCCGGCGGCGGGGCCCGCGCCCGGCCCGCCTGCCTTCGCCGCCGCCGCCGCCGCCTCGGCCGCCAGCGCGCCCCCGCCTCCGCGCGCCCCGCCCCGGTGGGGGGCGGCCGGGGGCGCGGGGGCAGCACCCGGGCGGGACCTGCGAGGGCAGTGGCTCCCCGACCAGCCCTGGGGCAGGGGCCGCGGAGCGGCGCTGGGGAGGGGGTTGCAGAGGCTAAAAGAACAGTTCTAGAGGCAGGGTCCGAAGGGGTGGAACTGGAGGTCGGGGTCTGGGGGTAGCCCTGAGCAGGA	chr20:35226448-35226768
20	35227118	35227320	35227218	203	35226218	35228218	ENCFF208NUB.2	79854	35115357	35147364	-	EDEM2	10978	35172073	35216240	+	PROCR	MMP24	5	TTCAGCACCGCGGACAGGGGC,chr20,+,13,0.95263	TTCAGCACCGCGGACAGGGGC	chr20	+	13	0.95263	515	chr20:35227194-35227214	GGCACCGGGGACGGGCCTGGGCCGGGCCGCACCTACTGCCGAGGTCGCGGAGGCGGCGCGCCGGGGGTCCGCGCCTTGGGTCCGGGCTGGCGCGGCCCAGGGCGGGGGCTGGGGAGGGCCTCGCCGAGGGCCGCCGAGGCCGGGAGCTGCTTCAGCACCGCGGACAGGGGCAGCGGGCGGGGGCCGAGCACGAGGGTCGGGTTTGTTGTGTTGGCAGTGGGGTGTGTGGCCTGCATGACTATGTGCGAGGGAAACCGTACAACGCCTCGGAGTAAATAGTAAGCGCAGCCAGTCTGTTGTGGGTTGGGAGAAGAAACCGAG	chr20:35227044-35227364
20	35227118	35227320	35227218	203	35226218	35228218	ENCFF208NUB.2	79854	35115357	35147364	-	EDEM2	10978	35172073	35216240	+	PROCR	MMP24	5	GGCAGAACTAGGGCCAGCGGG,chr20,+,-276,0.78808	GGCAGAACTAGGGCCAGCGGG	chr20	+	-276	0.78808	804	chr20:35227483-35227503	CAGTCTGTTGTGGGTTGGGAGAAGAAACCGAGGATGTTCAAGCTGGAGAAGGGGGAGGGGGAGGGCGGAGGAAGGACTCGATCACTGTCTTCGTAGCTGAAGGGCTGTCAGGTGGAGGTAGGATAGACTTGTTCTAGCTTGGCCCCACAGGGCAGAACTAGGGCCAGCGGGAGTGGGGGTTGCAAGAAGACAAATTTGGGCTCGATATAGGAAGAAGTTTGTAACAATTGGAGCTGCTCAACCAGCTTAGGAGGCGGCGAGCTGCTCATCACTGGCATGTGCAAGTAAAAGCTCTCGGAGGGGATTGGATGGAGGCATGCA	chr20:35227333-35227653
20	35227118	35227320	35227218	203	35226218	35228218	ENCFF208NUB.2	79854	35115357	35147364	-	EDEM2	10978	35172073	35216240	+	PROCR	MMP24	5	GGCGGCACCGGGGACGGGCCT,chr20,+,166,0.75445	GGCGGCACCGGGGACGGGCCT	chr20	+	166	0.75445	362	chr20:35227041-35227061	GGCGGCGGCGGCGGCGGCGGGGGCAGGGAACCGGGCAGCGGTGGCGGTGGCGGTGGCGCGGGCGGACGAGGCGGAGGCGCCCTTCGCCGGGCAGGTGGGGCTGGCGCGCGGGGCCGGGGCGCGGGCTCGGGGCATCCGGGCAGGGCGGGGGGCGGCACCGGGGACGGGCCTGGGCCGGGCCGCACCTACTGCCGAGGTCGCGGAGGCGGCGCGCCGGGGGTCCGCGCCTTGGGTCCGGGCTGGCGCGGCCCAGGGCGGGGGCTGGGGAGGGCCTCGCCGAGGGCCGCCGAGGCCGGGAGCTGCTTCAGCACCGCGGACAGG	chr20:35226891-35227211
20	35227118	35227320	35227218	203	35226218	35228218	ENCFF208NUB.2	79854	35115357	35147364	-	EDEM2	10978	35172073	35216240	+	PROCR	MMP24	5	TCCGGAACCCTGGGGAGAGGG,chr20,-,857,0.74981	TCCGGAACCCTGGGGAGAGGG	chr20	-	857	0.74981	-329	chr20:35226350-35226370		chr20:35226200-35226520
20	35227118	35227320	35227218	203	35226218	35228218	ENCFF208NUB.2	79854	35115357	35147364	-	EDEM2	10978	35172073	35216240	+	PROCR	MMP24	5	GGCAGCACCCGGGCGGGACCT,chr20,-,609,0.72704	GGCAGCACCCGGGCGGGACCT	chr20	-	609	0.72704	-81	chr20:35226598-35226618	CGCGGCGCGGCCGCCCCGGCTCCTCGGCATCCCGGCGGCGGGGCCCGCGCCCGGCCCGCCTGCCTTCGCCGCCGCCGCCGCCGCCTCGGCCGCCAGCGCGCCCCCGCCTCCGCGCGCCCCGCCCCGGTGGGGGGCGGCCGGGGGCGCGGGGGCAGCACCCGGGCGGGACCTGCGAGGGCAGTGGCTCCCCGACCAGCCCTGGGGCAGGGGCCGCGGAGCGGCGCTGGGGAGGGGGTTGCAGAGGCTAAAAGAACAGTTCTAGAGGCAGGGTCCGAAGGGGTGGAACTGGAGGTCGGGGTCTGGGGGTAGCCCTGAGCAGGA	chr20:35226448-35226768
20	35227064	35227375	35227219	312	35226219	35228219	ENCFF713ZPE.3	79855	35115357	35147364	-	EDEM2	10979	35172073	35216240	+	PROCR	MMP24	5	TTCAGCACCGCGGACAGGGGC,chr20,+,14,0.95263	TTCAGCACCGCGGACAGGGGC	chr20	+	14	0.95263	515	chr20:35227194-35227214	GGCACCGGGGACGGGCCTGGGCCGGGCCGCACCTACTGCCGAGGTCGCGGAGGCGGCGCGCCGGGGGTCCGCGCCTTGGGTCCGGGCTGGCGCGGCCCAGGGCGGGGGCTGGGGAGGGCCTCGCCGAGGGCCGCCGAGGCCGGGAGCTGCTTCAGCACCGCGGACAGGGGCAGCGGGCGGGGGCCGAGCACGAGGGTCGGGTTTGTTGTGTTGGCAGTGGGGTGTGTGGCCTGCATGACTATGTGCGAGGGAAACCGTACAACGCCTCGGAGTAAATAGTAAGCGCAGCCAGTCTGTTGTGGGTTGGGAGAAGAAACCGAG	chr20:35227044-35227364
20	35227064	35227375	35227219	312	35226219	35228219	ENCFF713ZPE.3	79855	35115357	35147364	-	EDEM2	10979	35172073	35216240	+	PROCR	MMP24	5	GGCAGAACTAGGGCCAGCGGG,chr20,+,-275,0.78808	GGCAGAACTAGGGCCAGCGGG	chr20	+	-275	0.78808	804	chr20:35227483-35227503	CAGTCTGTTGTGGGTTGGGAGAAGAAACCGAGGATGTTCAAGCTGGAGAAGGGGGAGGGGGAGGGCGGAGGAAGGACTCGATCACTGTCTTCGTAGCTGAAGGGCTGTCAGGTGGAGGTAGGATAGACTTGTTCTAGCTTGGCCCCACAGGGCAGAACTAGGGCCAGCGGGAGTGGGGGTTGCAAGAAGACAAATTTGGGCTCGATATAGGAAGAAGTTTGTAACAATTGGAGCTGCTCAACCAGCTTAGGAGGCGGCGAGCTGCTCATCACTGGCATGTGCAAGTAAAAGCTCTCGGAGGGGATTGGATGGAGGCATGCA	chr20:35227333-35227653
20	35227064	35227375	35227219	312	35226219	35228219	ENCFF713ZPE.3	79855	35115357	35147364	-	EDEM2	10979	35172073	35216240	+	PROCR	MMP24	5	GGCGGCACCGGGGACGGGCCT,chr20,+,167,0.75445	GGCGGCACCGGGGACGGGCCT	chr20	+	167	0.75445	362	chr20:35227041-35227061	GGCGGCGGCGGCGGCGGCGGGGGCAGGGAACCGGGCAGCGGTGGCGGTGGCGGTGGCGCGGGCGGACGAGGCGGAGGCGCCCTTCGCCGGGCAGGTGGGGCTGGCGCGCGGGGCCGGGGCGCGGGCTCGGGGCATCCGGGCAGGGCGGGGGGCGGCACCGGGGACGGGCCTGGGCCGGGCCGCACCTACTGCCGAGGTCGCGGAGGCGGCGCGCCGGGGGTCCGCGCCTTGGGTCCGGGCTGGCGCGGCCCAGGGCGGGGGCTGGGGAGGGCCTCGCCGAGGGCCGCCGAGGCCGGGAGCTGCTTCAGCACCGCGGACAGG	chr20:35226891-35227211
20	35227064	35227375	35227219	312	35226219	35228219	ENCFF713ZPE.3	79855	35115357	35147364	-	EDEM2	10979	35172073	35216240	+	PROCR	MMP24	5	TCCGGAACCCTGGGGAGAGGG,chr20,-,858,0.74981	TCCGGAACCCTGGGGAGAGGG	chr20	-	858	0.74981	-329	chr20:35226350-35226370		chr20:35226200-35226520
20	35227064	35227375	35227219	312	35226219	35228219	ENCFF713ZPE.3	79855	35115357	35147364	-	EDEM2	10979	35172073	35216240	+	PROCR	MMP24	5	GGCAGCACCCGGGCGGGACCT,chr20,-,610,0.72704	GGCAGCACCCGGGCGGGACCT	chr20	-	610	0.72704	-81	chr20:35226598-35226618	CGCGGCGCGGCCGCCCCGGCTCCTCGGCATCCCGGCGGCGGGGCCCGCGCCCGGCCCGCCTGCCTTCGCCGCCGCCGCCGCCGCCTCGGCCGCCAGCGCGCCCCCGCCTCCGCGCGCCCCGCCCCGGTGGGGGGCGGCCGGGGGCGCGGGGGCAGCACCCGGGCGGGACCTGCGAGGGCAGTGGCTCCCCGACCAGCCCTGGGGCAGGGGCCGCGGAGCGGCGCTGGGGAGGGGGTTGCAGAGGCTAAAAGAACAGTTCTAGAGGCAGGGTCCGAAGGGGTGGAACTGGAGGTCGGGGTCTGGGGGTAGCCCTGAGCAGGA	chr20:35226448-35226768
20	35227078	35227388	35227219	311	35226219	35228219	ENCFF403CAJ.2	79855	35115357	35147364	-	EDEM2	10979	35172073	35216240	+	PROCR	MMP24	5	TTCAGCACCGCGGACAGGGGC,chr20,+,14,0.95263	TTCAGCACCGCGGACAGGGGC	chr20	+	14	0.95263	515	chr20:35227194-35227214	GGCACCGGGGACGGGCCTGGGCCGGGCCGCACCTACTGCCGAGGTCGCGGAGGCGGCGCGCCGGGGGTCCGCGCCTTGGGTCCGGGCTGGCGCGGCCCAGGGCGGGGGCTGGGGAGGGCCTCGCCGAGGGCCGCCGAGGCCGGGAGCTGCTTCAGCACCGCGGACAGGGGCAGCGGGCGGGGGCCGAGCACGAGGGTCGGGTTTGTTGTGTTGGCAGTGGGGTGTGTGGCCTGCATGACTATGTGCGAGGGAAACCGTACAACGCCTCGGAGTAAATAGTAAGCGCAGCCAGTCTGTTGTGGGTTGGGAGAAGAAACCGAG	chr20:35227044-35227364
20	35227078	35227388	35227219	311	35226219	35228219	ENCFF403CAJ.2	79855	35115357	35147364	-	EDEM2	10979	35172073	35216240	+	PROCR	MMP24	5	GGCAGAACTAGGGCCAGCGGG,chr20,+,-275,0.78808	GGCAGAACTAGGGCCAGCGGG	chr20	+	-275	0.78808	804	chr20:35227483-35227503	CAGTCTGTTGTGGGTTGGGAGAAGAAACCGAGGATGTTCAAGCTGGAGAAGGGGGAGGGGGAGGGCGGAGGAAGGACTCGATCACTGTCTTCGTAGCTGAAGGGCTGTCAGGTGGAGGTAGGATAGACTTGTTCTAGCTTGGCCCCACAGGGCAGAACTAGGGCCAGCGGGAGTGGGGGTTGCAAGAAGACAAATTTGGGCTCGATATAGGAAGAAGTTTGTAACAATTGGAGCTGCTCAACCAGCTTAGGAGGCGGCGAGCTGCTCATCACTGGCATGTGCAAGTAAAAGCTCTCGGAGGGGATTGGATGGAGGCATGCA	chr20:35227333-35227653
20	35227078	35227388	35227219	311	35226219	35228219	ENCFF403CAJ.2	79855	35115357	35147364	-	EDEM2	10979	35172073	35216240	+	PROCR	MMP24	5	GGCGGCACCGGGGACGGGCCT,chr20,+,167,0.75445	GGCGGCACCGGGGACGGGCCT	chr20	+	167	0.75445	362	chr20:35227041-35227061	GGCGGCGGCGGCGGCGGCGGGGGCAGGGAACCGGGCAGCGGTGGCGGTGGCGGTGGCGCGGGCGGACGAGGCGGAGGCGCCCTTCGCCGGGCAGGTGGGGCTGGCGCGCGGGGCCGGGGCGCGGGCTCGGGGCATCCGGGCAGGGCGGGGGGCGGCACCGGGGACGGGCCTGGGCCGGGCCGCACCTACTGCCGAGGTCGCGGAGGCGGCGCGCCGGGGGTCCGCGCCTTGGGTCCGGGCTGGCGCGGCCCAGGGCGGGGGCTGGGGAGGGCCTCGCCGAGGGCCGCCGAGGCCGGGAGCTGCTTCAGCACCGCGGACAGG	chr20:35226891-35227211
20	35227078	35227388	35227219	311	35226219	35228219	ENCFF403CAJ.2	79855	35115357	35147364	-	EDEM2	10979	35172073	35216240	+	PROCR	MMP24	5	TCCGGAACCCTGGGGAGAGGG,chr20,-,858,0.74981	TCCGGAACCCTGGGGAGAGGG	chr20	-	858	0.74981	-329	chr20:35226350-35226370		chr20:35226200-35226520
20	35227078	35227388	35227219	311	35226219	35228219	ENCFF403CAJ.2	79855	35115357	35147364	-	EDEM2	10979	35172073	35216240	+	PROCR	MMP24	5	GGCAGCACCCGGGCGGGACCT,chr20,-,610,0.72704	GGCAGCACCCGGGCGGGACCT	chr20	-	610	0.72704	-81	chr20:35226598-35226618	CGCGGCGCGGCCGCCCCGGCTCCTCGGCATCCCGGCGGCGGGGCCCGCGCCCGGCCCGCCTGCCTTCGCCGCCGCCGCCGCCGCCTCGGCCGCCAGCGCGCCCCCGCCTCCGCGCGCCCCGCCCCGGTGGGGGGCGGCCGGGGGCGCGGGGGCAGCACCCGGGCGGGACCTGCGAGGGCAGTGGCTCCCCGACCAGCCCTGGGGCAGGGGCCGCGGAGCGGCGCTGGGGAGGGGGTTGCAGAGGCTAAAAGAACAGTTCTAGAGGCAGGGTCCGAAGGGGTGGAACTGGAGGTCGGGGTCTGGGGGTAGCCCTGAGCAGGA	chr20:35226448-35226768
20	35227041	35227392	35227224	352	35226224	35228224	ENCFF896RCP.5	79860	35115357	35147364	-	EDEM2	10984	35172073	35216240	+	PROCR	MMP24	5	TTCAGCACCGCGGACAGGGGC,chr20,+,19,0.95263	TTCAGCACCGCGGACAGGGGC	chr20	+	19	0.95263	515	chr20:35227194-35227214	GGCACCGGGGACGGGCCTGGGCCGGGCCGCACCTACTGCCGAGGTCGCGGAGGCGGCGCGCCGGGGGTCCGCGCCTTGGGTCCGGGCTGGCGCGGCCCAGGGCGGGGGCTGGGGAGGGCCTCGCCGAGGGCCGCCGAGGCCGGGAGCTGCTTCAGCACCGCGGACAGGGGCAGCGGGCGGGGGCCGAGCACGAGGGTCGGGTTTGTTGTGTTGGCAGTGGGGTGTGTGGCCTGCATGACTATGTGCGAGGGAAACCGTACAACGCCTCGGAGTAAATAGTAAGCGCAGCCAGTCTGTTGTGGGTTGGGAGAAGAAACCGAG	chr20:35227044-35227364
20	35227041	35227392	35227224	352	35226224	35228224	ENCFF896RCP.5	79860	35115357	35147364	-	EDEM2	10984	35172073	35216240	+	PROCR	MMP24	5	GGCAGAACTAGGGCCAGCGGG,chr20,+,-270,0.78808	GGCAGAACTAGGGCCAGCGGG	chr20	+	-270	0.78808	804	chr20:35227483-35227503	CAGTCTGTTGTGGGTTGGGAGAAGAAACCGAGGATGTTCAAGCTGGAGAAGGGGGAGGGGGAGGGCGGAGGAAGGACTCGATCACTGTCTTCGTAGCTGAAGGGCTGTCAGGTGGAGGTAGGATAGACTTGTTCTAGCTTGGCCCCACAGGGCAGAACTAGGGCCAGCGGGAGTGGGGGTTGCAAGAAGACAAATTTGGGCTCGATATAGGAAGAAGTTTGTAACAATTGGAGCTGCTCAACCAGCTTAGGAGGCGGCGAGCTGCTCATCACTGGCATGTGCAAGTAAAAGCTCTCGGAGGGGATTGGATGGAGGCATGCA	chr20:35227333-35227653
20	35227041	35227392	35227224	352	35226224	35228224	ENCFF896RCP.5	79860	35115357	35147364	-	EDEM2	10984	35172073	35216240	+	PROCR	MMP24	5	GGCGGCACCGGGGACGGGCCT,chr20,+,172,0.75445	GGCGGCACCGGGGACGGGCCT	chr20	+	172	0.75445	362	chr20:35227041-35227061	GGCGGCGGCGGCGGCGGCGGGGGCAGGGAACCGGGCAGCGGTGGCGGTGGCGGTGGCGCGGGCGGACGAGGCGGAGGCGCCCTTCGCCGGGCAGGTGGGGCTGGCGCGCGGGGCCGGGGCGCGGGCTCGGGGCATCCGGGCAGGGCGGGGGGCGGCACCGGGGACGGGCCTGGGCCGGGCCGCACCTACTGCCGAGGTCGCGGAGGCGGCGCGCCGGGGGTCCGCGCCTTGGGTCCGGGCTGGCGCGGCCCAGGGCGGGGGCTGGGGAGGGCCTCGCCGAGGGCCGCCGAGGCCGGGAGCTGCTTCAGCACCGCGGACAGG	chr20:35226891-35227211
20	35227041	35227392	35227224	352	35226224	35228224	ENCFF896RCP.5	79860	35115357	35147364	-	EDEM2	10984	35172073	35216240	+	PROCR	MMP24	5	TCCGGAACCCTGGGGAGAGGG,chr20,-,863,0.74981	TCCGGAACCCTGGGGAGAGGG	chr20	-	863	0.74981	-329	chr20:35226350-35226370		chr20:35226200-35226520
20	35227041	35227392	35227224	352	35226224	35228224	ENCFF896RCP.5	79860	35115357	35147364	-	EDEM2	10984	35172073	35216240	+	PROCR	MMP24	5	GGCAGCACCCGGGCGGGACCT,chr20,-,615,0.72704	GGCAGCACCCGGGCGGGACCT	chr20	-	615	0.72704	-81	chr20:35226598-35226618	CGCGGCGCGGCCGCCCCGGCTCCTCGGCATCCCGGCGGCGGGGCCCGCGCCCGGCCCGCCTGCCTTCGCCGCCGCCGCCGCCGCCTCGGCCGCCAGCGCGCCCCCGCCTCCGCGCGCCCCGCCCCGGTGGGGGGCGGCCGGGGGCGCGGGGGCAGCACCCGGGCGGGACCTGCGAGGGCAGTGGCTCCCCGACCAGCCCTGGGGCAGGGGCCGCGGAGCGGCGCTGGGGAGGGGGTTGCAGAGGCTAAAAGAACAGTTCTAGAGGCAGGGTCCGAAGGGGTGGAACTGGAGGTCGGGGTCTGGGGGTAGCCCTGAGCAGGA	chr20:35226448-35226768
20	35227081	35227370	35227224	290	35226224	35228224	ENCFF668YET.3	79860	35115357	35147364	-	EDEM2	10984	35172073	35216240	+	PROCR	MMP24	5	TTCAGCACCGCGGACAGGGGC,chr20,+,19,0.95263	TTCAGCACCGCGGACAGGGGC	chr20	+	19	0.95263	515	chr20:35227194-35227214	GGCACCGGGGACGGGCCTGGGCCGGGCCGCACCTACTGCCGAGGTCGCGGAGGCGGCGCGCCGGGGGTCCGCGCCTTGGGTCCGGGCTGGCGCGGCCCAGGGCGGGGGCTGGGGAGGGCCTCGCCGAGGGCCGCCGAGGCCGGGAGCTGCTTCAGCACCGCGGACAGGGGCAGCGGGCGGGGGCCGAGCACGAGGGTCGGGTTTGTTGTGTTGGCAGTGGGGTGTGTGGCCTGCATGACTATGTGCGAGGGAAACCGTACAACGCCTCGGAGTAAATAGTAAGCGCAGCCAGTCTGTTGTGGGTTGGGAGAAGAAACCGAG	chr20:35227044-35227364
20	35227081	35227370	35227224	290	35226224	35228224	ENCFF668YET.3	79860	35115357	35147364	-	EDEM2	10984	35172073	35216240	+	PROCR	MMP24	5	GGCAGAACTAGGGCCAGCGGG,chr20,+,-270,0.78808	GGCAGAACTAGGGCCAGCGGG	chr20	+	-270	0.78808	804	chr20:35227483-35227503	CAGTCTGTTGTGGGTTGGGAGAAGAAACCGAGGATGTTCAAGCTGGAGAAGGGGGAGGGGGAGGGCGGAGGAAGGACTCGATCACTGTCTTCGTAGCTGAAGGGCTGTCAGGTGGAGGTAGGATAGACTTGTTCTAGCTTGGCCCCACAGGGCAGAACTAGGGCCAGCGGGAGTGGGGGTTGCAAGAAGACAAATTTGGGCTCGATATAGGAAGAAGTTTGTAACAATTGGAGCTGCTCAACCAGCTTAGGAGGCGGCGAGCTGCTCATCACTGGCATGTGCAAGTAAAAGCTCTCGGAGGGGATTGGATGGAGGCATGCA	chr20:35227333-35227653
20	35227081	35227370	35227224	290	35226224	35228224	ENCFF668YET.3	79860	35115357	35147364	-	EDEM2	10984	35172073	35216240	+	PROCR	MMP24	5	GGCGGCACCGGGGACGGGCCT,chr20,+,172,0.75445	GGCGGCACCGGGGACGGGCCT	chr20	+	172	0.75445	362	chr20:35227041-35227061	GGCGGCGGCGGCGGCGGCGGGGGCAGGGAACCGGGCAGCGGTGGCGGTGGCGGTGGCGCGGGCGGACGAGGCGGAGGCGCCCTTCGCCGGGCAGGTGGGGCTGGCGCGCGGGGCCGGGGCGCGGGCTCGGGGCATCCGGGCAGGGCGGGGGGCGGCACCGGGGACGGGCCTGGGCCGGGCCGCACCTACTGCCGAGGTCGCGGAGGCGGCGCGCCGGGGGTCCGCGCCTTGGGTCCGGGCTGGCGCGGCCCAGGGCGGGGGCTGGGGAGGGCCTCGCCGAGGGCCGCCGAGGCCGGGAGCTGCTTCAGCACCGCGGACAGG	chr20:35226891-35227211
20	35227081	35227370	35227224	290	35226224	35228224	ENCFF668YET.3	79860	35115357	35147364	-	EDEM2	10984	35172073	35216240	+	PROCR	MMP24	5	TCCGGAACCCTGGGGAGAGGG,chr20,-,863,0.74981	TCCGGAACCCTGGGGAGAGGG	chr20	-	863	0.74981	-329	chr20:35226350-35226370		chr20:35226200-35226520
20	35227081	35227370	35227224	290	35226224	35228224	ENCFF668YET.3	79860	35115357	35147364	-	EDEM2	10984	35172073	35216240	+	PROCR	MMP24	5	GGCAGCACCCGGGCGGGACCT,chr20,-,615,0.72704	GGCAGCACCCGGGCGGGACCT	chr20	-	615	0.72704	-81	chr20:35226598-35226618	CGCGGCGCGGCCGCCCCGGCTCCTCGGCATCCCGGCGGCGGGGCCCGCGCCCGGCCCGCCTGCCTTCGCCGCCGCCGCCGCCGCCTCGGCCGCCAGCGCGCCCCCGCCTCCGCGCGCCCCGCCCCGGTGGGGGGCGGCCGGGGGCGCGGGGGCAGCACCCGGGCGGGACCTGCGAGGGCAGTGGCTCCCCGACCAGCCCTGGGGCAGGGGCCGCGGAGCGGCGCTGGGGAGGGGGTTGCAGAGGCTAAAAGAACAGTTCTAGAGGCAGGGTCCGAAGGGGTGGAACTGGAGGTCGGGGTCTGGGGGTAGCCCTGAGCAGGA	chr20:35226448-35226768
20	35227074	35227377	35227224	304	35226224	35228224	ENCFF540FXB.3	79860	35115357	35147364	-	EDEM2	10984	35172073	35216240	+	PROCR	MMP24	5	TTCAGCACCGCGGACAGGGGC,chr20,+,19,0.95263	TTCAGCACCGCGGACAGGGGC	chr20	+	19	0.95263	515	chr20:35227194-35227214	GGCACCGGGGACGGGCCTGGGCCGGGCCGCACCTACTGCCGAGGTCGCGGAGGCGGCGCGCCGGGGGTCCGCGCCTTGGGTCCGGGCTGGCGCGGCCCAGGGCGGGGGCTGGGGAGGGCCTCGCCGAGGGCCGCCGAGGCCGGGAGCTGCTTCAGCACCGCGGACAGGGGCAGCGGGCGGGGGCCGAGCACGAGGGTCGGGTTTGTTGTGTTGGCAGTGGGGTGTGTGGCCTGCATGACTATGTGCGAGGGAAACCGTACAACGCCTCGGAGTAAATAGTAAGCGCAGCCAGTCTGTTGTGGGTTGGGAGAAGAAACCGAG	chr20:35227044-35227364
20	35227074	35227377	35227224	304	35226224	35228224	ENCFF540FXB.3	79860	35115357	35147364	-	EDEM2	10984	35172073	35216240	+	PROCR	MMP24	5	GGCAGAACTAGGGCCAGCGGG,chr20,+,-270,0.78808	GGCAGAACTAGGGCCAGCGGG	chr20	+	-270	0.78808	804	chr20:35227483-35227503	CAGTCTGTTGTGGGTTGGGAGAAGAAACCGAGGATGTTCAAGCTGGAGAAGGGGGAGGGGGAGGGCGGAGGAAGGACTCGATCACTGTCTTCGTAGCTGAAGGGCTGTCAGGTGGAGGTAGGATAGACTTGTTCTAGCTTGGCCCCACAGGGCAGAACTAGGGCCAGCGGGAGTGGGGGTTGCAAGAAGACAAATTTGGGCTCGATATAGGAAGAAGTTTGTAACAATTGGAGCTGCTCAACCAGCTTAGGAGGCGGCGAGCTGCTCATCACTGGCATGTGCAAGTAAAAGCTCTCGGAGGGGATTGGATGGAGGCATGCA	chr20:35227333-35227653
20	35227074	35227377	35227224	304	35226224	35228224	ENCFF540FXB.3	79860	35115357	35147364	-	EDEM2	10984	35172073	35216240	+	PROCR	MMP24	5	GGCGGCACCGGGGACGGGCCT,chr20,+,172,0.75445	GGCGGCACCGGGGACGGGCCT	chr20	+	172	0.75445	362	chr20:35227041-35227061	GGCGGCGGCGGCGGCGGCGGGGGCAGGGAACCGGGCAGCGGTGGCGGTGGCGGTGGCGCGGGCGGACGAGGCGGAGGCGCCCTTCGCCGGGCAGGTGGGGCTGGCGCGCGGGGCCGGGGCGCGGGCTCGGGGCATCCGGGCAGGGCGGGGGGCGGCACCGGGGACGGGCCTGGGCCGGGCCGCACCTACTGCCGAGGTCGCGGAGGCGGCGCGCCGGGGGTCCGCGCCTTGGGTCCGGGCTGGCGCGGCCCAGGGCGGGGGCTGGGGAGGGCCTCGCCGAGGGCCGCCGAGGCCGGGAGCTGCTTCAGCACCGCGGACAGG	chr20:35226891-35227211
20	35227074	35227377	35227224	304	35226224	35228224	ENCFF540FXB.3	79860	35115357	35147364	-	EDEM2	10984	35172073	35216240	+	PROCR	MMP24	5	TCCGGAACCCTGGGGAGAGGG,chr20,-,863,0.74981	TCCGGAACCCTGGGGAGAGGG	chr20	-	863	0.74981	-329	chr20:35226350-35226370		chr20:35226200-35226520
20	35227074	35227377	35227224	304	35226224	35228224	ENCFF540FXB.3	79860	35115357	35147364	-	EDEM2	10984	35172073	35216240	+	PROCR	MMP24	5	GGCAGCACCCGGGCGGGACCT,chr20,-,615,0.72704	GGCAGCACCCGGGCGGGACCT	chr20	-	615	0.72704	-81	chr20:35226598-35226618	CGCGGCGCGGCCGCCCCGGCTCCTCGGCATCCCGGCGGCGGGGCCCGCGCCCGGCCCGCCTGCCTTCGCCGCCGCCGCCGCCGCCTCGGCCGCCAGCGCGCCCCCGCCTCCGCGCGCCCCGCCCCGGTGGGGGGCGGCCGGGGGCGCGGGGGCAGCACCCGGGCGGGACCTGCGAGGGCAGTGGCTCCCCGACCAGCCCTGGGGCAGGGGCCGCGGAGCGGCGCTGGGGAGGGGGTTGCAGAGGCTAAAAGAACAGTTCTAGAGGCAGGGTCCGAAGGGGTGGAACTGGAGGTCGGGGTCTGGGGGTAGCCCTGAGCAGGA	chr20:35226448-35226768
20	35227071	35227392	35227228	322	35226228	35228228	ENCFF669XCW.4	79864	35115357	35147364	-	EDEM2	10988	35172073	35216240	+	PROCR	MMP24	5	TTCAGCACCGCGGACAGGGGC,chr20,+,23,0.95263	TTCAGCACCGCGGACAGGGGC	chr20	+	23	0.95263	515	chr20:35227194-35227214	GGCACCGGGGACGGGCCTGGGCCGGGCCGCACCTACTGCCGAGGTCGCGGAGGCGGCGCGCCGGGGGTCCGCGCCTTGGGTCCGGGCTGGCGCGGCCCAGGGCGGGGGCTGGGGAGGGCCTCGCCGAGGGCCGCCGAGGCCGGGAGCTGCTTCAGCACCGCGGACAGGGGCAGCGGGCGGGGGCCGAGCACGAGGGTCGGGTTTGTTGTGTTGGCAGTGGGGTGTGTGGCCTGCATGACTATGTGCGAGGGAAACCGTACAACGCCTCGGAGTAAATAGTAAGCGCAGCCAGTCTGTTGTGGGTTGGGAGAAGAAACCGAG	chr20:35227044-35227364
20	35227071	35227392	35227228	322	35226228	35228228	ENCFF669XCW.4	79864	35115357	35147364	-	EDEM2	10988	35172073	35216240	+	PROCR	MMP24	5	GGCAGAACTAGGGCCAGCGGG,chr20,+,-266,0.78808	GGCAGAACTAGGGCCAGCGGG	chr20	+	-266	0.78808	804	chr20:35227483-35227503	CAGTCTGTTGTGGGTTGGGAGAAGAAACCGAGGATGTTCAAGCTGGAGAAGGGGGAGGGGGAGGGCGGAGGAAGGACTCGATCACTGTCTTCGTAGCTGAAGGGCTGTCAGGTGGAGGTAGGATAGACTTGTTCTAGCTTGGCCCCACAGGGCAGAACTAGGGCCAGCGGGAGTGGGGGTTGCAAGAAGACAAATTTGGGCTCGATATAGGAAGAAGTTTGTAACAATTGGAGCTGCTCAACCAGCTTAGGAGGCGGCGAGCTGCTCATCACTGGCATGTGCAAGTAAAAGCTCTCGGAGGGGATTGGATGGAGGCATGCA	chr20:35227333-35227653
20	35227071	35227392	35227228	322	35226228	35228228	ENCFF669XCW.4	79864	35115357	35147364	-	EDEM2	10988	35172073	35216240	+	PROCR	MMP24	5	GGCGGCACCGGGGACGGGCCT,chr20,+,176,0.75445	GGCGGCACCGGGGACGGGCCT	chr20	+	176	0.75445	362	chr20:35227041-35227061	GGCGGCGGCGGCGGCGGCGGGGGCAGGGAACCGGGCAGCGGTGGCGGTGGCGGTGGCGCGGGCGGACGAGGCGGAGGCGCCCTTCGCCGGGCAGGTGGGGCTGGCGCGCGGGGCCGGGGCGCGGGCTCGGGGCATCCGGGCAGGGCGGGGGGCGGCACCGGGGACGGGCCTGGGCCGGGCCGCACCTACTGCCGAGGTCGCGGAGGCGGCGCGCCGGGGGTCCGCGCCTTGGGTCCGGGCTGGCGCGGCCCAGGGCGGGGGCTGGGGAGGGCCTCGCCGAGGGCCGCCGAGGCCGGGAGCTGCTTCAGCACCGCGGACAGG	chr20:35226891-35227211
20	35227071	35227392	35227228	322	35226228	35228228	ENCFF669XCW.4	79864	35115357	35147364	-	EDEM2	10988	35172073	35216240	+	PROCR	MMP24	5	TCCGGAACCCTGGGGAGAGGG,chr20,-,867,0.74981	TCCGGAACCCTGGGGAGAGGG	chr20	-	867	0.74981	-329	chr20:35226350-35226370		chr20:35226200-35226520
20	35227071	35227392	35227228	322	35226228	35228228	ENCFF669XCW.4	79864	35115357	35147364	-	EDEM2	10988	35172073	35216240	+	PROCR	MMP24	5	GGCAGCACCCGGGCGGGACCT,chr20,-,619,0.72704	GGCAGCACCCGGGCGGGACCT	chr20	-	619	0.72704	-81	chr20:35226598-35226618	CGCGGCGCGGCCGCCCCGGCTCCTCGGCATCCCGGCGGCGGGGCCCGCGCCCGGCCCGCCTGCCTTCGCCGCCGCCGCCGCCGCCTCGGCCGCCAGCGCGCCCCCGCCTCCGCGCGCCCCGCCCCGGTGGGGGGCGGCCGGGGGCGCGGGGGCAGCACCCGGGCGGGACCTGCGAGGGCAGTGGCTCCCCGACCAGCCCTGGGGCAGGGGCCGCGGAGCGGCGCTGGGGAGGGGGTTGCAGAGGCTAAAAGAACAGTTCTAGAGGCAGGGTCCGAAGGGGTGGAACTGGAGGTCGGGGTCTGGGGGTAGCCCTGAGCAGGA	chr20:35226448-35226768
20	35227005	35227374	35227229	370	35226229	35228229	ENCFF986RRJ.1	79865	35115357	35147364	-	EDEM2	10989	35172073	35216240	+	PROCR	MMP24	5	TTCAGCACCGCGGACAGGGGC,chr20,+,24,0.95263	TTCAGCACCGCGGACAGGGGC	chr20	+	24	0.95263	515	chr20:35227194-35227214	GGCACCGGGGACGGGCCTGGGCCGGGCCGCACCTACTGCCGAGGTCGCGGAGGCGGCGCGCCGGGGGTCCGCGCCTTGGGTCCGGGCTGGCGCGGCCCAGGGCGGGGGCTGGGGAGGGCCTCGCCGAGGGCCGCCGAGGCCGGGAGCTGCTTCAGCACCGCGGACAGGGGCAGCGGGCGGGGGCCGAGCACGAGGGTCGGGTTTGTTGTGTTGGCAGTGGGGTGTGTGGCCTGCATGACTATGTGCGAGGGAAACCGTACAACGCCTCGGAGTAAATAGTAAGCGCAGCCAGTCTGTTGTGGGTTGGGAGAAGAAACCGAG	chr20:35227044-35227364
20	35227005	35227374	35227229	370	35226229	35228229	ENCFF986RRJ.1	79865	35115357	35147364	-	EDEM2	10989	35172073	35216240	+	PROCR	MMP24	5	GGCAGAACTAGGGCCAGCGGG,chr20,+,-265,0.78808	GGCAGAACTAGGGCCAGCGGG	chr20	+	-265	0.78808	804	chr20:35227483-35227503	CAGTCTGTTGTGGGTTGGGAGAAGAAACCGAGGATGTTCAAGCTGGAGAAGGGGGAGGGGGAGGGCGGAGGAAGGACTCGATCACTGTCTTCGTAGCTGAAGGGCTGTCAGGTGGAGGTAGGATAGACTTGTTCTAGCTTGGCCCCACAGGGCAGAACTAGGGCCAGCGGGAGTGGGGGTTGCAAGAAGACAAATTTGGGCTCGATATAGGAAGAAGTTTGTAACAATTGGAGCTGCTCAACCAGCTTAGGAGGCGGCGAGCTGCTCATCACTGGCATGTGCAAGTAAAAGCTCTCGGAGGGGATTGGATGGAGGCATGCA	chr20:35227333-35227653
20	35227005	35227374	35227229	370	35226229	35228229	ENCFF986RRJ.1	79865	35115357	35147364	-	EDEM2	10989	35172073	35216240	+	PROCR	MMP24	5	GGCGGCACCGGGGACGGGCCT,chr20,+,177,0.75445	GGCGGCACCGGGGACGGGCCT	chr20	+	177	0.75445	362	chr20:35227041-35227061	GGCGGCGGCGGCGGCGGCGGGGGCAGGGAACCGGGCAGCGGTGGCGGTGGCGGTGGCGCGGGCGGACGAGGCGGAGGCGCCCTTCGCCGGGCAGGTGGGGCTGGCGCGCGGGGCCGGGGCGCGGGCTCGGGGCATCCGGGCAGGGCGGGGGGCGGCACCGGGGACGGGCCTGGGCCGGGCCGCACCTACTGCCGAGGTCGCGGAGGCGGCGCGCCGGGGGTCCGCGCCTTGGGTCCGGGCTGGCGCGGCCCAGGGCGGGGGCTGGGGAGGGCCTCGCCGAGGGCCGCCGAGGCCGGGAGCTGCTTCAGCACCGCGGACAGG	chr20:35226891-35227211
20	35227005	35227374	35227229	370	35226229	35228229	ENCFF986RRJ.1	79865	35115357	35147364	-	EDEM2	10989	35172073	35216240	+	PROCR	MMP24	5	TCCGGAACCCTGGGGAGAGGG,chr20,-,868,0.74981	TCCGGAACCCTGGGGAGAGGG	chr20	-	868	0.74981	-329	chr20:35226350-35226370		chr20:35226200-35226520
20	35227005	35227374	35227229	370	35226229	35228229	ENCFF986RRJ.1	79865	35115357	35147364	-	EDEM2	10989	35172073	35216240	+	PROCR	MMP24	5	GGCAGCACCCGGGCGGGACCT,chr20,-,620,0.72704	GGCAGCACCCGGGCGGGACCT	chr20	-	620	0.72704	-81	chr20:35226598-35226618	CGCGGCGCGGCCGCCCCGGCTCCTCGGCATCCCGGCGGCGGGGCCCGCGCCCGGCCCGCCTGCCTTCGCCGCCGCCGCCGCCGCCTCGGCCGCCAGCGCGCCCCCGCCTCCGCGCGCCCCGCCCCGGTGGGGGGCGGCCGGGGGCGCGGGGGCAGCACCCGGGCGGGACCTGCGAGGGCAGTGGCTCCCCGACCAGCCCTGGGGCAGGGGCCGCGGAGCGGCGCTGGGGAGGGGGTTGCAGAGGCTAAAAGAACAGTTCTAGAGGCAGGGTCCGAAGGGGTGGAACTGGAGGTCGGGGTCTGGGGGTAGCCCTGAGCAGGA	chr20:35226448-35226768
20	35227077	35227368	35227229	292	35226229	35228229	ENCFF313CII.1	79865	35115357	35147364	-	EDEM2	10989	35172073	35216240	+	PROCR	MMP24	5	TTCAGCACCGCGGACAGGGGC,chr20,+,24,0.95263	TTCAGCACCGCGGACAGGGGC	chr20	+	24	0.95263	515	chr20:35227194-35227214	GGCACCGGGGACGGGCCTGGGCCGGGCCGCACCTACTGCCGAGGTCGCGGAGGCGGCGCGCCGGGGGTCCGCGCCTTGGGTCCGGGCTGGCGCGGCCCAGGGCGGGGGCTGGGGAGGGCCTCGCCGAGGGCCGCCGAGGCCGGGAGCTGCTTCAGCACCGCGGACAGGGGCAGCGGGCGGGGGCCGAGCACGAGGGTCGGGTTTGTTGTGTTGGCAGTGGGGTGTGTGGCCTGCATGACTATGTGCGAGGGAAACCGTACAACGCCTCGGAGTAAATAGTAAGCGCAGCCAGTCTGTTGTGGGTTGGGAGAAGAAACCGAG	chr20:35227044-35227364
20	35227077	35227368	35227229	292	35226229	35228229	ENCFF313CII.1	79865	35115357	35147364	-	EDEM2	10989	35172073	35216240	+	PROCR	MMP24	5	GGCAGAACTAGGGCCAGCGGG,chr20,+,-265,0.78808	GGCAGAACTAGGGCCAGCGGG	chr20	+	-265	0.78808	804	chr20:35227483-35227503	CAGTCTGTTGTGGGTTGGGAGAAGAAACCGAGGATGTTCAAGCTGGAGAAGGGGGAGGGGGAGGGCGGAGGAAGGACTCGATCACTGTCTTCGTAGCTGAAGGGCTGTCAGGTGGAGGTAGGATAGACTTGTTCTAGCTTGGCCCCACAGGGCAGAACTAGGGCCAGCGGGAGTGGGGGTTGCAAGAAGACAAATTTGGGCTCGATATAGGAAGAAGTTTGTAACAATTGGAGCTGCTCAACCAGCTTAGGAGGCGGCGAGCTGCTCATCACTGGCATGTGCAAGTAAAAGCTCTCGGAGGGGATTGGATGGAGGCATGCA	chr20:35227333-35227653
20	35227077	35227368	35227229	292	35226229	35228229	ENCFF313CII.1	79865	35115357	35147364	-	EDEM2	10989	35172073	35216240	+	PROCR	MMP24	5	GGCGGCACCGGGGACGGGCCT,chr20,+,177,0.75445	GGCGGCACCGGGGACGGGCCT	chr20	+	177	0.75445	362	chr20:35227041-35227061	GGCGGCGGCGGCGGCGGCGGGGGCAGGGAACCGGGCAGCGGTGGCGGTGGCGGTGGCGCGGGCGGACGAGGCGGAGGCGCCCTTCGCCGGGCAGGTGGGGCTGGCGCGCGGGGCCGGGGCGCGGGCTCGGGGCATCCGGGCAGGGCGGGGGGCGGCACCGGGGACGGGCCTGGGCCGGGCCGCACCTACTGCCGAGGTCGCGGAGGCGGCGCGCCGGGGGTCCGCGCCTTGGGTCCGGGCTGGCGCGGCCCAGGGCGGGGGCTGGGGAGGGCCTCGCCGAGGGCCGCCGAGGCCGGGAGCTGCTTCAGCACCGCGGACAGG	chr20:35226891-35227211
20	35227077	35227368	35227229	292	35226229	35228229	ENCFF313CII.1	79865	35115357	35147364	-	EDEM2	10989	35172073	35216240	+	PROCR	MMP24	5	TCCGGAACCCTGGGGAGAGGG,chr20,-,868,0.74981	TCCGGAACCCTGGGGAGAGGG	chr20	-	868	0.74981	-329	chr20:35226350-35226370		chr20:35226200-35226520
20	35227077	35227368	35227229	292	35226229	35228229	ENCFF313CII.1	79865	35115357	35147364	-	EDEM2	10989	35172073	35216240	+	PROCR	MMP24	5	GGCAGCACCCGGGCGGGACCT,chr20,-,620,0.72704	GGCAGCACCCGGGCGGGACCT	chr20	-	620	0.72704	-81	chr20:35226598-35226618	CGCGGCGCGGCCGCCCCGGCTCCTCGGCATCCCGGCGGCGGGGCCCGCGCCCGGCCCGCCTGCCTTCGCCGCCGCCGCCGCCGCCTCGGCCGCCAGCGCGCCCCCGCCTCCGCGCGCCCCGCCCCGGTGGGGGGCGGCCGGGGGCGCGGGGGCAGCACCCGGGCGGGACCTGCGAGGGCAGTGGCTCCCCGACCAGCCCTGGGGCAGGGGCCGCGGAGCGGCGCTGGGGAGGGGGTTGCAGAGGCTAAAAGAACAGTTCTAGAGGCAGGGTCCGAAGGGGTGGAACTGGAGGTCGGGGTCTGGGGGTAGCCCTGAGCAGGA	chr20:35226448-35226768
20	35227033	35227563	35227234	531	35226234	35228234	ENCFF107EWI.3	79870	35115357	35147364	-	EDEM2	10994	35172073	35216240	+	PROCR	MMP24	5	TTCAGCACCGCGGACAGGGGC,chr20,+,29,0.95263	TTCAGCACCGCGGACAGGGGC	chr20	+	29	0.95263	515	chr20:35227194-35227214	GGCACCGGGGACGGGCCTGGGCCGGGCCGCACCTACTGCCGAGGTCGCGGAGGCGGCGCGCCGGGGGTCCGCGCCTTGGGTCCGGGCTGGCGCGGCCCAGGGCGGGGGCTGGGGAGGGCCTCGCCGAGGGCCGCCGAGGCCGGGAGCTGCTTCAGCACCGCGGACAGGGGCAGCGGGCGGGGGCCGAGCACGAGGGTCGGGTTTGTTGTGTTGGCAGTGGGGTGTGTGGCCTGCATGACTATGTGCGAGGGAAACCGTACAACGCCTCGGAGTAAATAGTAAGCGCAGCCAGTCTGTTGTGGGTTGGGAGAAGAAACCGAG	chr20:35227044-35227364
20	35227033	35227563	35227234	531	35226234	35228234	ENCFF107EWI.3	79870	35115357	35147364	-	EDEM2	10994	35172073	35216240	+	PROCR	MMP24	5	GGCAGAACTAGGGCCAGCGGG,chr20,+,-260,0.78808	GGCAGAACTAGGGCCAGCGGG	chr20	+	-260	0.78808	804	chr20:35227483-35227503	CAGTCTGTTGTGGGTTGGGAGAAGAAACCGAGGATGTTCAAGCTGGAGAAGGGGGAGGGGGAGGGCGGAGGAAGGACTCGATCACTGTCTTCGTAGCTGAAGGGCTGTCAGGTGGAGGTAGGATAGACTTGTTCTAGCTTGGCCCCACAGGGCAGAACTAGGGCCAGCGGGAGTGGGGGTTGCAAGAAGACAAATTTGGGCTCGATATAGGAAGAAGTTTGTAACAATTGGAGCTGCTCAACCAGCTTAGGAGGCGGCGAGCTGCTCATCACTGGCATGTGCAAGTAAAAGCTCTCGGAGGGGATTGGATGGAGGCATGCA	chr20:35227333-35227653
20	35227033	35227563	35227234	531	35226234	35228234	ENCFF107EWI.3	79870	35115357	35147364	-	EDEM2	10994	35172073	35216240	+	PROCR	MMP24	5	GGCGGCACCGGGGACGGGCCT,chr20,+,182,0.75445	GGCGGCACCGGGGACGGGCCT	chr20	+	182	0.75445	362	chr20:35227041-35227061	GGCGGCGGCGGCGGCGGCGGGGGCAGGGAACCGGGCAGCGGTGGCGGTGGCGGTGGCGCGGGCGGACGAGGCGGAGGCGCCCTTCGCCGGGCAGGTGGGGCTGGCGCGCGGGGCCGGGGCGCGGGCTCGGGGCATCCGGGCAGGGCGGGGGGCGGCACCGGGGACGGGCCTGGGCCGGGCCGCACCTACTGCCGAGGTCGCGGAGGCGGCGCGCCGGGGGTCCGCGCCTTGGGTCCGGGCTGGCGCGGCCCAGGGCGGGGGCTGGGGAGGGCCTCGCCGAGGGCCGCCGAGGCCGGGAGCTGCTTCAGCACCGCGGACAGG	chr20:35226891-35227211
20	35227033	35227563	35227234	531	35226234	35228234	ENCFF107EWI.3	79870	35115357	35147364	-	EDEM2	10994	35172073	35216240	+	PROCR	MMP24	5	TCCGGAACCCTGGGGAGAGGG,chr20,-,873,0.74981	TCCGGAACCCTGGGGAGAGGG	chr20	-	873	0.74981	-329	chr20:35226350-35226370		chr20:35226200-35226520
20	35227033	35227563	35227234	531	35226234	35228234	ENCFF107EWI.3	79870	35115357	35147364	-	EDEM2	10994	35172073	35216240	+	PROCR	MMP24	5	GGCAGCACCCGGGCGGGACCT,chr20,-,625,0.72704	GGCAGCACCCGGGCGGGACCT	chr20	-	625	0.72704	-81	chr20:35226598-35226618	CGCGGCGCGGCCGCCCCGGCTCCTCGGCATCCCGGCGGCGGGGCCCGCGCCCGGCCCGCCTGCCTTCGCCGCCGCCGCCGCCGCCTCGGCCGCCAGCGCGCCCCCGCCTCCGCGCGCCCCGCCCCGGTGGGGGGCGGCCGGGGGCGCGGGGGCAGCACCCGGGCGGGACCTGCGAGGGCAGTGGCTCCCCGACCAGCCCTGGGGCAGGGGCCGCGGAGCGGCGCTGGGGAGGGGGTTGCAGAGGCTAAAAGAACAGTTCTAGAGGCAGGGTCCGAAGGGGTGGAACTGGAGGTCGGGGTCTGGGGGTAGCCCTGAGCAGGA	chr20:35226448-35226768
20	35227003	35227508	35227237	506	35226237	35228237	ENCFF290ESJ.5	79873	35115357	35147364	-	EDEM2	10997	35172073	35216240	+	PROCR	MMP24	5	TTCAGCACCGCGGACAGGGGC,chr20,+,32,0.95263	TTCAGCACCGCGGACAGGGGC	chr20	+	32	0.95263	515	chr20:35227194-35227214	GGCACCGGGGACGGGCCTGGGCCGGGCCGCACCTACTGCCGAGGTCGCGGAGGCGGCGCGCCGGGGGTCCGCGCCTTGGGTCCGGGCTGGCGCGGCCCAGGGCGGGGGCTGGGGAGGGCCTCGCCGAGGGCCGCCGAGGCCGGGAGCTGCTTCAGCACCGCGGACAGGGGCAGCGGGCGGGGGCCGAGCACGAGGGTCGGGTTTGTTGTGTTGGCAGTGGGGTGTGTGGCCTGCATGACTATGTGCGAGGGAAACCGTACAACGCCTCGGAGTAAATAGTAAGCGCAGCCAGTCTGTTGTGGGTTGGGAGAAGAAACCGAG	chr20:35227044-35227364
20	35227003	35227508	35227237	506	35226237	35228237	ENCFF290ESJ.5	79873	35115357	35147364	-	EDEM2	10997	35172073	35216240	+	PROCR	MMP24	5	GGCAGAACTAGGGCCAGCGGG,chr20,+,-257,0.78808	GGCAGAACTAGGGCCAGCGGG	chr20	+	-257	0.78808	804	chr20:35227483-35227503	CAGTCTGTTGTGGGTTGGGAGAAGAAACCGAGGATGTTCAAGCTGGAGAAGGGGGAGGGGGAGGGCGGAGGAAGGACTCGATCACTGTCTTCGTAGCTGAAGGGCTGTCAGGTGGAGGTAGGATAGACTTGTTCTAGCTTGGCCCCACAGGGCAGAACTAGGGCCAGCGGGAGTGGGGGTTGCAAGAAGACAAATTTGGGCTCGATATAGGAAGAAGTTTGTAACAATTGGAGCTGCTCAACCAGCTTAGGAGGCGGCGAGCTGCTCATCACTGGCATGTGCAAGTAAAAGCTCTCGGAGGGGATTGGATGGAGGCATGCA	chr20:35227333-35227653
20	35227003	35227508	35227237	506	35226237	35228237	ENCFF290ESJ.5	79873	35115357	35147364	-	EDEM2	10997	35172073	35216240	+	PROCR	MMP24	5	GGCGGCACCGGGGACGGGCCT,chr20,+,185,0.75445	GGCGGCACCGGGGACGGGCCT	chr20	+	185	0.75445	362	chr20:35227041-35227061	GGCGGCGGCGGCGGCGGCGGGGGCAGGGAACCGGGCAGCGGTGGCGGTGGCGGTGGCGCGGGCGGACGAGGCGGAGGCGCCCTTCGCCGGGCAGGTGGGGCTGGCGCGCGGGGCCGGGGCGCGGGCTCGGGGCATCCGGGCAGGGCGGGGGGCGGCACCGGGGACGGGCCTGGGCCGGGCCGCACCTACTGCCGAGGTCGCGGAGGCGGCGCGCCGGGGGTCCGCGCCTTGGGTCCGGGCTGGCGCGGCCCAGGGCGGGGGCTGGGGAGGGCCTCGCCGAGGGCCGCCGAGGCCGGGAGCTGCTTCAGCACCGCGGACAGG	chr20:35226891-35227211
20	35227003	35227508	35227237	506	35226237	35228237	ENCFF290ESJ.5	79873	35115357	35147364	-	EDEM2	10997	35172073	35216240	+	PROCR	MMP24	5	TCCGGAACCCTGGGGAGAGGG,chr20,-,876,0.74981	TCCGGAACCCTGGGGAGAGGG	chr20	-	876	0.74981	-329	chr20:35226350-35226370		chr20:35226200-35226520
20	35227003	35227508	35227237	506	35226237	35228237	ENCFF290ESJ.5	79873	35115357	35147364	-	EDEM2	10997	35172073	35216240	+	PROCR	MMP24	5	GGCAGCACCCGGGCGGGACCT,chr20,-,628,0.72704	GGCAGCACCCGGGCGGGACCT	chr20	-	628	0.72704	-81	chr20:35226598-35226618	CGCGGCGCGGCCGCCCCGGCTCCTCGGCATCCCGGCGGCGGGGCCCGCGCCCGGCCCGCCTGCCTTCGCCGCCGCCGCCGCCGCCTCGGCCGCCAGCGCGCCCCCGCCTCCGCGCGCCCCGCCCCGGTGGGGGGCGGCCGGGGGCGCGGGGGCAGCACCCGGGCGGGACCTGCGAGGGCAGTGGCTCCCCGACCAGCCCTGGGGCAGGGGCCGCGGAGCGGCGCTGGGGAGGGGGTTGCAGAGGCTAAAAGAACAGTTCTAGAGGCAGGGTCCGAAGGGGTGGAACTGGAGGTCGGGGTCTGGGGGTAGCCCTGAGCAGGA	chr20:35226448-35226768
20	35227080	35227467	35227238	388	35226238	35228238	ENCFF779CWH.2	79874	35115357	35147364	-	EDEM2	10998	35172073	35216240	+	PROCR	MMP24	5	TTCAGCACCGCGGACAGGGGC,chr20,+,33,0.95263	TTCAGCACCGCGGACAGGGGC	chr20	+	33	0.95263	515	chr20:35227194-35227214	GGCACCGGGGACGGGCCTGGGCCGGGCCGCACCTACTGCCGAGGTCGCGGAGGCGGCGCGCCGGGGGTCCGCGCCTTGGGTCCGGGCTGGCGCGGCCCAGGGCGGGGGCTGGGGAGGGCCTCGCCGAGGGCCGCCGAGGCCGGGAGCTGCTTCAGCACCGCGGACAGGGGCAGCGGGCGGGGGCCGAGCACGAGGGTCGGGTTTGTTGTGTTGGCAGTGGGGTGTGTGGCCTGCATGACTATGTGCGAGGGAAACCGTACAACGCCTCGGAGTAAATAGTAAGCGCAGCCAGTCTGTTGTGGGTTGGGAGAAGAAACCGAG	chr20:35227044-35227364
20	35227080	35227467	35227238	388	35226238	35228238	ENCFF779CWH.2	79874	35115357	35147364	-	EDEM2	10998	35172073	35216240	+	PROCR	MMP24	5	GGCAGAACTAGGGCCAGCGGG,chr20,+,-256,0.78808	GGCAGAACTAGGGCCAGCGGG	chr20	+	-256	0.78808	804	chr20:35227483-35227503	CAGTCTGTTGTGGGTTGGGAGAAGAAACCGAGGATGTTCAAGCTGGAGAAGGGGGAGGGGGAGGGCGGAGGAAGGACTCGATCACTGTCTTCGTAGCTGAAGGGCTGTCAGGTGGAGGTAGGATAGACTTGTTCTAGCTTGGCCCCACAGGGCAGAACTAGGGCCAGCGGGAGTGGGGGTTGCAAGAAGACAAATTTGGGCTCGATATAGGAAGAAGTTTGTAACAATTGGAGCTGCTCAACCAGCTTAGGAGGCGGCGAGCTGCTCATCACTGGCATGTGCAAGTAAAAGCTCTCGGAGGGGATTGGATGGAGGCATGCA	chr20:35227333-35227653
20	35227080	35227467	35227238	388	35226238	35228238	ENCFF779CWH.2	79874	35115357	35147364	-	EDEM2	10998	35172073	35216240	+	PROCR	MMP24	5	GGCGGCACCGGGGACGGGCCT,chr20,+,186,0.75445	GGCGGCACCGGGGACGGGCCT	chr20	+	186	0.75445	362	chr20:35227041-35227061	GGCGGCGGCGGCGGCGGCGGGGGCAGGGAACCGGGCAGCGGTGGCGGTGGCGGTGGCGCGGGCGGACGAGGCGGAGGCGCCCTTCGCCGGGCAGGTGGGGCTGGCGCGCGGGGCCGGGGCGCGGGCTCGGGGCATCCGGGCAGGGCGGGGGGCGGCACCGGGGACGGGCCTGGGCCGGGCCGCACCTACTGCCGAGGTCGCGGAGGCGGCGCGCCGGGGGTCCGCGCCTTGGGTCCGGGCTGGCGCGGCCCAGGGCGGGGGCTGGGGAGGGCCTCGCCGAGGGCCGCCGAGGCCGGGAGCTGCTTCAGCACCGCGGACAGG	chr20:35226891-35227211
20	35227080	35227467	35227238	388	35226238	35228238	ENCFF779CWH.2	79874	35115357	35147364	-	EDEM2	10998	35172073	35216240	+	PROCR	MMP24	5	TCCGGAACCCTGGGGAGAGGG,chr20,-,877,0.74981	TCCGGAACCCTGGGGAGAGGG	chr20	-	877	0.74981	-329	chr20:35226350-35226370		chr20:35226200-35226520
20	35227080	35227467	35227238	388	35226238	35228238	ENCFF779CWH.2	79874	35115357	35147364	-	EDEM2	10998	35172073	35216240	+	PROCR	MMP24	5	GGCAGCACCCGGGCGGGACCT,chr20,-,629,0.72704	GGCAGCACCCGGGCGGGACCT	chr20	-	629	0.72704	-81	chr20:35226598-35226618	CGCGGCGCGGCCGCCCCGGCTCCTCGGCATCCCGGCGGCGGGGCCCGCGCCCGGCCCGCCTGCCTTCGCCGCCGCCGCCGCCGCCTCGGCCGCCAGCGCGCCCCCGCCTCCGCGCGCCCCGCCCCGGTGGGGGGCGGCCGGGGGCGCGGGGGCAGCACCCGGGCGGGACCTGCGAGGGCAGTGGCTCCCCGACCAGCCCTGGGGCAGGGGCCGCGGAGCGGCGCTGGGGAGGGGGTTGCAGAGGCTAAAAGAACAGTTCTAGAGGCAGGGTCCGAAGGGGTGGAACTGGAGGTCGGGGTCTGGGGGTAGCCCTGAGCAGGA	chr20:35226448-35226768
20	35227011	35227580	35227265	570	35226265	35228265	ENCFF706DRE.2	79901	35115357	35147364	-	EDEM2	11025	35172073	35216240	+	PROCR	MMP24	5	TTCAGCACCGCGGACAGGGGC,chr20,+,60,0.95263	TTCAGCACCGCGGACAGGGGC	chr20	+	60	0.95263	515	chr20:35227194-35227214	GGCACCGGGGACGGGCCTGGGCCGGGCCGCACCTACTGCCGAGGTCGCGGAGGCGGCGCGCCGGGGGTCCGCGCCTTGGGTCCGGGCTGGCGCGGCCCAGGGCGGGGGCTGGGGAGGGCCTCGCCGAGGGCCGCCGAGGCCGGGAGCTGCTTCAGCACCGCGGACAGGGGCAGCGGGCGGGGGCCGAGCACGAGGGTCGGGTTTGTTGTGTTGGCAGTGGGGTGTGTGGCCTGCATGACTATGTGCGAGGGAAACCGTACAACGCCTCGGAGTAAATAGTAAGCGCAGCCAGTCTGTTGTGGGTTGGGAGAAGAAACCGAG	chr20:35227044-35227364
20	35227011	35227580	35227265	570	35226265	35228265	ENCFF706DRE.2	79901	35115357	35147364	-	EDEM2	11025	35172073	35216240	+	PROCR	MMP24	5	GGCAGAACTAGGGCCAGCGGG,chr20,+,-229,0.78808	GGCAGAACTAGGGCCAGCGGG	chr20	+	-229	0.78808	804	chr20:35227483-35227503	CAGTCTGTTGTGGGTTGGGAGAAGAAACCGAGGATGTTCAAGCTGGAGAAGGGGGAGGGGGAGGGCGGAGGAAGGACTCGATCACTGTCTTCGTAGCTGAAGGGCTGTCAGGTGGAGGTAGGATAGACTTGTTCTAGCTTGGCCCCACAGGGCAGAACTAGGGCCAGCGGGAGTGGGGGTTGCAAGAAGACAAATTTGGGCTCGATATAGGAAGAAGTTTGTAACAATTGGAGCTGCTCAACCAGCTTAGGAGGCGGCGAGCTGCTCATCACTGGCATGTGCAAGTAAAAGCTCTCGGAGGGGATTGGATGGAGGCATGCA	chr20:35227333-35227653
20	35227011	35227580	35227265	570	35226265	35228265	ENCFF706DRE.2	79901	35115357	35147364	-	EDEM2	11025	35172073	35216240	+	PROCR	MMP24	5	GGCGGCACCGGGGACGGGCCT,chr20,+,213,0.75445	GGCGGCACCGGGGACGGGCCT	chr20	+	213	0.75445	362	chr20:35227041-35227061	GGCGGCGGCGGCGGCGGCGGGGGCAGGGAACCGGGCAGCGGTGGCGGTGGCGGTGGCGCGGGCGGACGAGGCGGAGGCGCCCTTCGCCGGGCAGGTGGGGCTGGCGCGCGGGGCCGGGGCGCGGGCTCGGGGCATCCGGGCAGGGCGGGGGGCGGCACCGGGGACGGGCCTGGGCCGGGCCGCACCTACTGCCGAGGTCGCGGAGGCGGCGCGCCGGGGGTCCGCGCCTTGGGTCCGGGCTGGCGCGGCCCAGGGCGGGGGCTGGGGAGGGCCTCGCCGAGGGCCGCCGAGGCCGGGAGCTGCTTCAGCACCGCGGACAGG	chr20:35226891-35227211
20	35227011	35227580	35227265	570	35226265	35228265	ENCFF706DRE.2	79901	35115357	35147364	-	EDEM2	11025	35172073	35216240	+	PROCR	MMP24	5	TCCGGAACCCTGGGGAGAGGG,chr20,-,904,0.74981	TCCGGAACCCTGGGGAGAGGG	chr20	-	904	0.74981	-329	chr20:35226350-35226370		chr20:35226200-35226520
20	35227011	35227580	35227265	570	35226265	35228265	ENCFF706DRE.2	79901	35115357	35147364	-	EDEM2	11025	35172073	35216240	+	PROCR	MMP24	5	GGCAGCACCCGGGCGGGACCT,chr20,-,656,0.72704	GGCAGCACCCGGGCGGGACCT	chr20	-	656	0.72704	-81	chr20:35226598-35226618	CGCGGCGCGGCCGCCCCGGCTCCTCGGCATCCCGGCGGCGGGGCCCGCGCCCGGCCCGCCTGCCTTCGCCGCCGCCGCCGCCGCCTCGGCCGCCAGCGCGCCCCCGCCTCCGCGCGCCCCGCCCCGGTGGGGGGCGGCCGGGGGCGCGGGGGCAGCACCCGGGCGGGACCTGCGAGGGCAGTGGCTCCCCGACCAGCCCTGGGGCAGGGGCCGCGGAGCGGCGCTGGGGAGGGGGTTGCAGAGGCTAAAAGAACAGTTCTAGAGGCAGGGTCCGAAGGGGTGGAACTGGAGGTCGGGGTCTGGGGGTAGCCCTGAGCAGGA	chr20:35226448-35226768
20	35227080	35227467	35227438	388	35226438	35228438	ENCFF779CWH.1	80074	35115357	35147364	-	EDEM2	11198	35172073	35216240	+	PROCR	MMP24	4	TTCAGCACCGCGGACAGGGGC,chr20,+,233,0.95263	TTCAGCACCGCGGACAGGGGC	chr20	+	233	0.95263	515	chr20:35227194-35227214	GGCACCGGGGACGGGCCTGGGCCGGGCCGCACCTACTGCCGAGGTCGCGGAGGCGGCGCGCCGGGGGTCCGCGCCTTGGGTCCGGGCTGGCGCGGCCCAGGGCGGGGGCTGGGGAGGGCCTCGCCGAGGGCCGCCGAGGCCGGGAGCTGCTTCAGCACCGCGGACAGGGGCAGCGGGCGGGGGCCGAGCACGAGGGTCGGGTTTGTTGTGTTGGCAGTGGGGTGTGTGGCCTGCATGACTATGTGCGAGGGAAACCGTACAACGCCTCGGAGTAAATAGTAAGCGCAGCCAGTCTGTTGTGGGTTGGGAGAAGAAACCGAG	chr20:35227044-35227364
20	35227080	35227467	35227438	388	35226438	35228438	ENCFF779CWH.1	80074	35115357	35147364	-	EDEM2	11198	35172073	35216240	+	PROCR	MMP24	4	GGCAGAACTAGGGCCAGCGGG,chr20,+,-56,0.78808	GGCAGAACTAGGGCCAGCGGG	chr20	+	-56	0.78808	804	chr20:35227483-35227503	CAGTCTGTTGTGGGTTGGGAGAAGAAACCGAGGATGTTCAAGCTGGAGAAGGGGGAGGGGGAGGGCGGAGGAAGGACTCGATCACTGTCTTCGTAGCTGAAGGGCTGTCAGGTGGAGGTAGGATAGACTTGTTCTAGCTTGGCCCCACAGGGCAGAACTAGGGCCAGCGGGAGTGGGGGTTGCAAGAAGACAAATTTGGGCTCGATATAGGAAGAAGTTTGTAACAATTGGAGCTGCTCAACCAGCTTAGGAGGCGGCGAGCTGCTCATCACTGGCATGTGCAAGTAAAAGCTCTCGGAGGGGATTGGATGGAGGCATGCA	chr20:35227333-35227653
20	35227080	35227467	35227438	388	35226438	35228438	ENCFF779CWH.1	80074	35115357	35147364	-	EDEM2	11198	35172073	35216240	+	PROCR	MMP24	4	GGCGGCACCGGGGACGGGCCT,chr20,+,386,0.75445	GGCGGCACCGGGGACGGGCCT	chr20	+	386	0.75445	362	chr20:35227041-35227061	GGCGGCGGCGGCGGCGGCGGGGGCAGGGAACCGGGCAGCGGTGGCGGTGGCGGTGGCGCGGGCGGACGAGGCGGAGGCGCCCTTCGCCGGGCAGGTGGGGCTGGCGCGCGGGGCCGGGGCGCGGGCTCGGGGCATCCGGGCAGGGCGGGGGGCGGCACCGGGGACGGGCCTGGGCCGGGCCGCACCTACTGCCGAGGTCGCGGAGGCGGCGCGCCGGGGGTCCGCGCCTTGGGTCCGGGCTGGCGCGGCCCAGGGCGGGGGCTGGGGAGGGCCTCGCCGAGGGCCGCCGAGGCCGGGAGCTGCTTCAGCACCGCGGACAGG	chr20:35226891-35227211
20	35227080	35227467	35227438	388	35226438	35228438	ENCFF779CWH.1	80074	35115357	35147364	-	EDEM2	11198	35172073	35216240	+	PROCR	MMP24	4	GGCAGCACCCGGGCGGGACCT,chr20,-,829,0.72704	GGCAGCACCCGGGCGGGACCT	chr20	-	829	0.72704	-81	chr20:35226598-35226618	CGCGGCGCGGCCGCCCCGGCTCCTCGGCATCCCGGCGGCGGGGCCCGCGCCCGGCCCGCCTGCCTTCGCCGCCGCCGCCGCCGCCTCGGCCGCCAGCGCGCCCCCGCCTCCGCGCGCCCCGCCCCGGTGGGGGGCGGCCGGGGGCGCGGGGGCAGCACCCGGGCGGGACCTGCGAGGGCAGTGGCTCCCCGACCAGCCCTGGGGCAGGGGCCGCGGAGCGGCGCTGGGGAGGGGGTTGCAGAGGCTAAAAGAACAGTTCTAGAGGCAGGGTCCGAAGGGGTGGAACTGGAGGTCGGGGTCTGGGGGTAGCCCTGAGCAGGA	chr20:35226448-35226768
20	35227011	35227580	35227486	570	35226486	35228486	ENCFF706DRE.1	80122	35115357	35147364	-	EDEM2	11246	35172073	35216240	+	PROCR	MMP24	4	TTCAGCACCGCGGACAGGGGC,chr20,+,281,0.95263	TTCAGCACCGCGGACAGGGGC	chr20	+	281	0.95263	515	chr20:35227194-35227214	GGCACCGGGGACGGGCCTGGGCCGGGCCGCACCTACTGCCGAGGTCGCGGAGGCGGCGCGCCGGGGGTCCGCGCCTTGGGTCCGGGCTGGCGCGGCCCAGGGCGGGGGCTGGGGAGGGCCTCGCCGAGGGCCGCCGAGGCCGGGAGCTGCTTCAGCACCGCGGACAGGGGCAGCGGGCGGGGGCCGAGCACGAGGGTCGGGTTTGTTGTGTTGGCAGTGGGGTGTGTGGCCTGCATGACTATGTGCGAGGGAAACCGTACAACGCCTCGGAGTAAATAGTAAGCGCAGCCAGTCTGTTGTGGGTTGGGAGAAGAAACCGAG	chr20:35227044-35227364
20	35227011	35227580	35227486	570	35226486	35228486	ENCFF706DRE.1	80122	35115357	35147364	-	EDEM2	11246	35172073	35216240	+	PROCR	MMP24	4	GGCAGAACTAGGGCCAGCGGG,chr20,+,-8,0.78808	GGCAGAACTAGGGCCAGCGGG	chr20	+	-8	0.78808	804	chr20:35227483-35227503	CAGTCTGTTGTGGGTTGGGAGAAGAAACCGAGGATGTTCAAGCTGGAGAAGGGGGAGGGGGAGGGCGGAGGAAGGACTCGATCACTGTCTTCGTAGCTGAAGGGCTGTCAGGTGGAGGTAGGATAGACTTGTTCTAGCTTGGCCCCACAGGGCAGAACTAGGGCCAGCGGGAGTGGGGGTTGCAAGAAGACAAATTTGGGCTCGATATAGGAAGAAGTTTGTAACAATTGGAGCTGCTCAACCAGCTTAGGAGGCGGCGAGCTGCTCATCACTGGCATGTGCAAGTAAAAGCTCTCGGAGGGGATTGGATGGAGGCATGCA	chr20:35227333-35227653
20	35227011	35227580	35227486	570	35226486	35228486	ENCFF706DRE.1	80122	35115357	35147364	-	EDEM2	11246	35172073	35216240	+	PROCR	MMP24	4	GGCGGCACCGGGGACGGGCCT,chr20,+,434,0.75445	GGCGGCACCGGGGACGGGCCT	chr20	+	434	0.75445	362	chr20:35227041-35227061	GGCGGCGGCGGCGGCGGCGGGGGCAGGGAACCGGGCAGCGGTGGCGGTGGCGGTGGCGCGGGCGGACGAGGCGGAGGCGCCCTTCGCCGGGCAGGTGGGGCTGGCGCGCGGGGCCGGGGCGCGGGCTCGGGGCATCCGGGCAGGGCGGGGGGCGGCACCGGGGACGGGCCTGGGCCGGGCCGCACCTACTGCCGAGGTCGCGGAGGCGGCGCGCCGGGGGTCCGCGCCTTGGGTCCGGGCTGGCGCGGCCCAGGGCGGGGGCTGGGGAGGGCCTCGCCGAGGGCCGCCGAGGCCGGGAGCTGCTTCAGCACCGCGGACAGG	chr20:35226891-35227211
20	35227011	35227580	35227486	570	35226486	35228486	ENCFF706DRE.1	80122	35115357	35147364	-	EDEM2	11246	35172073	35216240	+	PROCR	MMP24	4	GGCAGCACCCGGGCGGGACCT,chr20,-,877,0.72704	GGCAGCACCCGGGCGGGACCT	chr20	-	877	0.72704	-81	chr20:35226598-35226618		chr20:35226448-35226768
20	35232510	35232766	35232638	257	35231638	35233638	ENCFF540FXB.1	85274	35115357	35147364	-	EDEM2	16398	35172073	35216240	+	PROCR	MMP24	2	CTCAGTACCTAGCACAGTGCA,chr20,+,295,0.8317	CTCAGTACCTAGCACAGTGCA	chr20	+	295	0.8317	5653	chr20:35232332-35232352	TCCTACTCTGGTCCTTGAAAGAGGTATTTTTAGAACTAATAAAAGTAAATTATAATTGTACCCAAAAGACTAATCTTAGGAAATGCCTAGCCCTATAGTATGGTATTGTTTGAACTCAAAACAGGAAGAACAAACCACAGCCAATATCTCCTCAGTACCTAGCACAGTGCATGATACATTCTGGACATGTGATAAATATTTTAAAATTAATTTTGTTATCTAATCCCCATCAACTTCTTTGAATAGTGCTTGGCACACAAAAGTCGCTACCTTTTGTGAAGAATAAATGAATGCATGCTAGAGGTATAACAAGGTGCCGGG	chr20:35232182-35232502
20	35232510	35232766	35232638	257	35231638	35233638	ENCFF540FXB.1	85274	35115357	35147364	-	EDEM2	16398	35172073	35216240	+	PROCR	MMP24	2	TGCACCACCAGGCTCAGCTAA,chr20,-,724,0.71727	TGCACCACCAGGCTCAGCTAA	chr20	-	724	0.71727	5224	chr20:35231903-35231923	TGTTATTTGCTTTAATTTCTTTTTTTCTTCTGAGACGGAGATTCACTCTTTTGCCCAGGCTGGAGTGAAGTGGCACAGTCTTGGCTCACTACAACCTCTGCCCCCGGGGTTCAAGCAATTCTCCTGCCTCAGCAGCTGGGATTACAGGCATGCACCACCAGGCTCAGCTAATTTTTGTATTTTTAGTAGAGATGGGGTTTCACCATGTTGGCCAGGCTAGTCTCAAACTCCTGACCTCAGGTGATCCACCTGCCTCGGCCTCCCAAAGTGCTGGGATTACAGGTGTGAGCCACCATGCCTGGCCTGCTTTAATGTTTATGA	chr20:35231753-35232073
20	35257544	35258034	35257789	491	35256789	35258789	ENCFF107EWI.2	110425	35115357	35147364	-	EDEM2	10096	35267885	35280043	-	AL121753.1	MMP24	3	CAAAGTACCTTGGAAATGTCT,chr20,+,-569,0.73311	CAAAGTACCTTGGAAATGTCT	chr20	+	-569	0.73311	31668	chr20:35258347-35258367	AGGCATTCTAACATTTCACCTTTAAATACTTTAGTATATACCTCTAACAGATAAAGGCTAATTTTTAACATAAGCACACAATCATTATCAAGCCCAACAAAATTAACAATAATTTTTTAAAATCTAATACCCAGTTCGAGTTCACTTTCCCAAAGTACCTTGGAAATGTCTTTTACAGTTGTTTGCTTGAATCAGGATCCAAACAAGATCCACACACACATGGCTGACATGTCTCTTAAAGCCCTTTTTATTTAAAACACCCCCGTCCTACACACACGTTTCCCTCCATATATTTGTTGAAGAAACTGGGTCAGGTGTCCC	chr20:35258197-35258517
20	35257544	35258034	35257789	491	35256789	35258789	ENCFF107EWI.2	110425	35115357	35147364	-	EDEM2	10096	35267885	35280043	-	AL121753.1	MMP24	3	CTCAGGACCACAGCAATCGAC,chr20,+,-84,0.71178	CTCAGGACCACAGCAATCGAC	chr20	+	-84	0.71178	31183	chr20:35257862-35257882	ATCCCAGCACCTCTCCCATCTGTCCAACCCTAACCTTCATGAAAGACTGCCAATTCTGATAGAAATTCCAAGATTGCTAATGTTTTCTTTGGATAAGAATCAGGACTTTGCTCTGCTCTGGAAAACCAAGCAGGAACTGTCCAGATGCAGCTCAGGACCACAGCAATCGACTCCTGAACTGGAATGCAGTGAAGGCAGGTTTTGGGTGAGAGGCAAGGAACCAAAATTTATTGAGCATCCATATATTATCTCGTTTAATTTCCACATAGACTCAGCAAAGGGGTGGAGTTTCCTGGGAACTTTTTGAACTTATTAGCTTAC	chr20:35257712-35258032
20	35257544	35258034	35257789	491	35256789	35258789	ENCFF107EWI.2	110425	35115357	35147364	-	EDEM2	10096	35267885	35280043	-	AL121753.1	MMP24	3	TGAAGAAACTGGGTCAGGTGT,chr20,+,-716,0.70025	TGAAGAAACTGGGTCAGGTGT	chr20	+	-716	0.70025	31815	chr20:35258494-35258514	TCCCAAAGTACCTTGGAAATGTCTTTTACAGTTGTTTGCTTGAATCAGGATCCAAACAAGATCCACACACACATGGCTGACATGTCTCTTAAAGCCCTTTTTATTTAAAACACCCCCGTCCTACACACACGTTTCCCTCCATATATTTGTTGAAGAAACTGGGTCAGGTGTCCCGAGTATAATCATTTGGCGTGACTAGAATCAAGTTTACTTTTAATACGTCTCTCTTGCCCATAATTCCTGAATGTTGTTCATTAGATTTACAGGCTGACTAGATTCAAGTTCAATTTTTTTGGCAAGAATACTTCCTAGGTGGTGCTG	chr20:35258344-35258664
20	35257717	35257961	35257839	245	35256839	35258839	ENCFF208NUB.1	110475	35115357	35147364	-	EDEM2	10046	35267885	35280043	-	AL121753.1	MMP24	3	CAAAGTACCTTGGAAATGTCT,chr20,+,-519,0.73311	CAAAGTACCTTGGAAATGTCT	chr20	+	-519	0.73311	31668	chr20:35258347-35258367	AGGCATTCTAACATTTCACCTTTAAATACTTTAGTATATACCTCTAACAGATAAAGGCTAATTTTTAACATAAGCACACAATCATTATCAAGCCCAACAAAATTAACAATAATTTTTTAAAATCTAATACCCAGTTCGAGTTCACTTTCCCAAAGTACCTTGGAAATGTCTTTTACAGTTGTTTGCTTGAATCAGGATCCAAACAAGATCCACACACACATGGCTGACATGTCTCTTAAAGCCCTTTTTATTTAAAACACCCCCGTCCTACACACACGTTTCCCTCCATATATTTGTTGAAGAAACTGGGTCAGGTGTCCC	chr20:35258197-35258517
20	35257717	35257961	35257839	245	35256839	35258839	ENCFF208NUB.1	110475	35115357	35147364	-	EDEM2	10046	35267885	35280043	-	AL121753.1	MMP24	3	CTCAGGACCACAGCAATCGAC,chr20,+,-34,0.71178	CTCAGGACCACAGCAATCGAC	chr20	+	-34	0.71178	31183	chr20:35257862-35257882	ATCCCAGCACCTCTCCCATCTGTCCAACCCTAACCTTCATGAAAGACTGCCAATTCTGATAGAAATTCCAAGATTGCTAATGTTTTCTTTGGATAAGAATCAGGACTTTGCTCTGCTCTGGAAAACCAAGCAGGAACTGTCCAGATGCAGCTCAGGACCACAGCAATCGACTCCTGAACTGGAATGCAGTGAAGGCAGGTTTTGGGTGAGAGGCAAGGAACCAAAATTTATTGAGCATCCATATATTATCTCGTTTAATTTCCACATAGACTCAGCAAAGGGGTGGAGTTTCCTGGGAACTTTTTGAACTTATTAGCTTAC	chr20:35257712-35258032
20	35257717	35257961	35257839	245	35256839	35258839	ENCFF208NUB.1	110475	35115357	35147364	-	EDEM2	10046	35267885	35280043	-	AL121753.1	MMP24	3	TGAAGAAACTGGGTCAGGTGT,chr20,+,-666,0.70025	TGAAGAAACTGGGTCAGGTGT	chr20	+	-666	0.70025	31815	chr20:35258494-35258514	TCCCAAAGTACCTTGGAAATGTCTTTTACAGTTGTTTGCTTGAATCAGGATCCAAACAAGATCCACACACACATGGCTGACATGTCTCTTAAAGCCCTTTTTATTTAAAACACCCCCGTCCTACACACACGTTTCCCTCCATATATTTGTTGAAGAAACTGGGTCAGGTGTCCCGAGTATAATCATTTGGCGTGACTAGAATCAAGTTTACTTTTAATACGTCTCTCTTGCCCATAATTCCTGAATGTTGTTCATTAGATTTACAGGCTGACTAGATTCAAGTTCAATTTTTTTGGCAAGAATACTTCCTAGGTGGTGCTG	chr20:35258344-35258664
20	35257703	35257979	35257841	277	35256841	35258841	ENCFF668YET.2	110477	35115357	35147364	-	EDEM2	10044	35267885	35280043	-	AL121753.1	MMP24	3	CAAAGTACCTTGGAAATGTCT,chr20,+,-517,0.73311	CAAAGTACCTTGGAAATGTCT	chr20	+	-517	0.73311	31668	chr20:35258347-35258367	AGGCATTCTAACATTTCACCTTTAAATACTTTAGTATATACCTCTAACAGATAAAGGCTAATTTTTAACATAAGCACACAATCATTATCAAGCCCAACAAAATTAACAATAATTTTTTAAAATCTAATACCCAGTTCGAGTTCACTTTCCCAAAGTACCTTGGAAATGTCTTTTACAGTTGTTTGCTTGAATCAGGATCCAAACAAGATCCACACACACATGGCTGACATGTCTCTTAAAGCCCTTTTTATTTAAAACACCCCCGTCCTACACACACGTTTCCCTCCATATATTTGTTGAAGAAACTGGGTCAGGTGTCCC	chr20:35258197-35258517
20	35257703	35257979	35257841	277	35256841	35258841	ENCFF668YET.2	110477	35115357	35147364	-	EDEM2	10044	35267885	35280043	-	AL121753.1	MMP24	3	CTCAGGACCACAGCAATCGAC,chr20,+,-32,0.71178	CTCAGGACCACAGCAATCGAC	chr20	+	-32	0.71178	31183	chr20:35257862-35257882	ATCCCAGCACCTCTCCCATCTGTCCAACCCTAACCTTCATGAAAGACTGCCAATTCTGATAGAAATTCCAAGATTGCTAATGTTTTCTTTGGATAAGAATCAGGACTTTGCTCTGCTCTGGAAAACCAAGCAGGAACTGTCCAGATGCAGCTCAGGACCACAGCAATCGACTCCTGAACTGGAATGCAGTGAAGGCAGGTTTTGGGTGAGAGGCAAGGAACCAAAATTTATTGAGCATCCATATATTATCTCGTTTAATTTCCACATAGACTCAGCAAAGGGGTGGAGTTTCCTGGGAACTTTTTGAACTTATTAGCTTAC	chr20:35257712-35258032
20	35257703	35257979	35257841	277	35256841	35258841	ENCFF668YET.2	110477	35115357	35147364	-	EDEM2	10044	35267885	35280043	-	AL121753.1	MMP24	3	TGAAGAAACTGGGTCAGGTGT,chr20,+,-664,0.70025	TGAAGAAACTGGGTCAGGTGT	chr20	+	-664	0.70025	31815	chr20:35258494-35258514	TCCCAAAGTACCTTGGAAATGTCTTTTACAGTTGTTTGCTTGAATCAGGATCCAAACAAGATCCACACACACATGGCTGACATGTCTCTTAAAGCCCTTTTTATTTAAAACACCCCCGTCCTACACACACGTTTCCCTCCATATATTTGTTGAAGAAACTGGGTCAGGTGTCCCGAGTATAATCATTTGGCGTGACTAGAATCAAGTTTACTTTTAATACGTCTCTCTTGCCCATAATTCCTGAATGTTGTTCATTAGATTTACAGGCTGACTAGATTCAAGTTCAATTTTTTTGGCAAGAATACTTCCTAGGTGGTGCTG	chr20:35258344-35258664
20	35257723	35257979	35257851	257	35256851	35258851	ENCFF540FXB.2	110487	35115357	35147364	-	EDEM2	10034	35267885	35280043	-	AL121753.1	MMP24	3	CAAAGTACCTTGGAAATGTCT,chr20,+,-507,0.73311	CAAAGTACCTTGGAAATGTCT	chr20	+	-507	0.73311	31668	chr20:35258347-35258367	AGGCATTCTAACATTTCACCTTTAAATACTTTAGTATATACCTCTAACAGATAAAGGCTAATTTTTAACATAAGCACACAATCATTATCAAGCCCAACAAAATTAACAATAATTTTTTAAAATCTAATACCCAGTTCGAGTTCACTTTCCCAAAGTACCTTGGAAATGTCTTTTACAGTTGTTTGCTTGAATCAGGATCCAAACAAGATCCACACACACATGGCTGACATGTCTCTTAAAGCCCTTTTTATTTAAAACACCCCCGTCCTACACACACGTTTCCCTCCATATATTTGTTGAAGAAACTGGGTCAGGTGTCCC	chr20:35258197-35258517
20	35257723	35257979	35257851	257	35256851	35258851	ENCFF540FXB.2	110487	35115357	35147364	-	EDEM2	10034	35267885	35280043	-	AL121753.1	MMP24	3	CTCAGGACCACAGCAATCGAC,chr20,+,-22,0.71178	CTCAGGACCACAGCAATCGAC	chr20	+	-22	0.71178	31183	chr20:35257862-35257882	ATCCCAGCACCTCTCCCATCTGTCCAACCCTAACCTTCATGAAAGACTGCCAATTCTGATAGAAATTCCAAGATTGCTAATGTTTTCTTTGGATAAGAATCAGGACTTTGCTCTGCTCTGGAAAACCAAGCAGGAACTGTCCAGATGCAGCTCAGGACCACAGCAATCGACTCCTGAACTGGAATGCAGTGAAGGCAGGTTTTGGGTGAGAGGCAAGGAACCAAAATTTATTGAGCATCCATATATTATCTCGTTTAATTTCCACATAGACTCAGCAAAGGGGTGGAGTTTCCTGGGAACTTTTTGAACTTATTAGCTTAC	chr20:35257712-35258032
20	35257723	35257979	35257851	257	35256851	35258851	ENCFF540FXB.2	110487	35115357	35147364	-	EDEM2	10034	35267885	35280043	-	AL121753.1	MMP24	3	TGAAGAAACTGGGTCAGGTGT,chr20,+,-654,0.70025	TGAAGAAACTGGGTCAGGTGT	chr20	+	-654	0.70025	31815	chr20:35258494-35258514	TCCCAAAGTACCTTGGAAATGTCTTTTACAGTTGTTTGCTTGAATCAGGATCCAAACAAGATCCACACACACATGGCTGACATGTCTCTTAAAGCCCTTTTTATTTAAAACACCCCCGTCCTACACACACGTTTCCCTCCATATATTTGTTGAAGAAACTGGGTCAGGTGTCCCGAGTATAATCATTTGGCGTGACTAGAATCAAGTTTACTTTTAATACGTCTCTCTTGCCCATAATTCCTGAATGTTGTTCATTAGATTTACAGGCTGACTAGATTCAAGTTCAATTTTTTTGGCAAGAATACTTCCTAGGTGGTGCTG	chr20:35258344-35258664
20	35257708	35257998	35257853	291	35256853	35258853	ENCFF669XCW.3	110489	35115357	35147364	-	EDEM2	10032	35267885	35280043	-	AL121753.1	MMP24	3	CAAAGTACCTTGGAAATGTCT,chr20,+,-505,0.73311	CAAAGTACCTTGGAAATGTCT	chr20	+	-505	0.73311	31668	chr20:35258347-35258367	AGGCATTCTAACATTTCACCTTTAAATACTTTAGTATATACCTCTAACAGATAAAGGCTAATTTTTAACATAAGCACACAATCATTATCAAGCCCAACAAAATTAACAATAATTTTTTAAAATCTAATACCCAGTTCGAGTTCACTTTCCCAAAGTACCTTGGAAATGTCTTTTACAGTTGTTTGCTTGAATCAGGATCCAAACAAGATCCACACACACATGGCTGACATGTCTCTTAAAGCCCTTTTTATTTAAAACACCCCCGTCCTACACACACGTTTCCCTCCATATATTTGTTGAAGAAACTGGGTCAGGTGTCCC	chr20:35258197-35258517
20	35257708	35257998	35257853	291	35256853	35258853	ENCFF669XCW.3	110489	35115357	35147364	-	EDEM2	10032	35267885	35280043	-	AL121753.1	MMP24	3	CTCAGGACCACAGCAATCGAC,chr20,+,-20,0.71178	CTCAGGACCACAGCAATCGAC	chr20	+	-20	0.71178	31183	chr20:35257862-35257882	ATCCCAGCACCTCTCCCATCTGTCCAACCCTAACCTTCATGAAAGACTGCCAATTCTGATAGAAATTCCAAGATTGCTAATGTTTTCTTTGGATAAGAATCAGGACTTTGCTCTGCTCTGGAAAACCAAGCAGGAACTGTCCAGATGCAGCTCAGGACCACAGCAATCGACTCCTGAACTGGAATGCAGTGAAGGCAGGTTTTGGGTGAGAGGCAAGGAACCAAAATTTATTGAGCATCCATATATTATCTCGTTTAATTTCCACATAGACTCAGCAAAGGGGTGGAGTTTCCTGGGAACTTTTTGAACTTATTAGCTTAC	chr20:35257712-35258032
20	35257708	35257998	35257853	291	35256853	35258853	ENCFF669XCW.3	110489	35115357	35147364	-	EDEM2	10032	35267885	35280043	-	AL121753.1	MMP24	3	TGAAGAAACTGGGTCAGGTGT,chr20,+,-652,0.70025	TGAAGAAACTGGGTCAGGTGT	chr20	+	-652	0.70025	31815	chr20:35258494-35258514	TCCCAAAGTACCTTGGAAATGTCTTTTACAGTTGTTTGCTTGAATCAGGATCCAAACAAGATCCACACACACATGGCTGACATGTCTCTTAAAGCCCTTTTTATTTAAAACACCCCCGTCCTACACACACGTTTCCCTCCATATATTTGTTGAAGAAACTGGGTCAGGTGTCCCGAGTATAATCATTTGGCGTGACTAGAATCAAGTTTACTTTTAATACGTCTCTCTTGCCCATAATTCCTGAATGTTGTTCATTAGATTTACAGGCTGACTAGATTCAAGTTCAATTTTTTTGGCAAGAATACTTCCTAGGTGGTGCTG	chr20:35258344-35258664
20	35257799	35257913	35257858	115	35256858	35258858	ENCFF896RCP.4	110494	35115357	35147364	-	EDEM2	10027	35267885	35280043	-	AL121753.1	MMP24	3	CAAAGTACCTTGGAAATGTCT,chr20,+,-500,0.73311	CAAAGTACCTTGGAAATGTCT	chr20	+	-500	0.73311	31668	chr20:35258347-35258367	AGGCATTCTAACATTTCACCTTTAAATACTTTAGTATATACCTCTAACAGATAAAGGCTAATTTTTAACATAAGCACACAATCATTATCAAGCCCAACAAAATTAACAATAATTTTTTAAAATCTAATACCCAGTTCGAGTTCACTTTCCCAAAGTACCTTGGAAATGTCTTTTACAGTTGTTTGCTTGAATCAGGATCCAAACAAGATCCACACACACATGGCTGACATGTCTCTTAAAGCCCTTTTTATTTAAAACACCCCCGTCCTACACACACGTTTCCCTCCATATATTTGTTGAAGAAACTGGGTCAGGTGTCCC	chr20:35258197-35258517
20	35257799	35257913	35257858	115	35256858	35258858	ENCFF896RCP.4	110494	35115357	35147364	-	EDEM2	10027	35267885	35280043	-	AL121753.1	MMP24	3	CTCAGGACCACAGCAATCGAC,chr20,+,-15,0.71178	CTCAGGACCACAGCAATCGAC	chr20	+	-15	0.71178	31183	chr20:35257862-35257882	ATCCCAGCACCTCTCCCATCTGTCCAACCCTAACCTTCATGAAAGACTGCCAATTCTGATAGAAATTCCAAGATTGCTAATGTTTTCTTTGGATAAGAATCAGGACTTTGCTCTGCTCTGGAAAACCAAGCAGGAACTGTCCAGATGCAGCTCAGGACCACAGCAATCGACTCCTGAACTGGAATGCAGTGAAGGCAGGTTTTGGGTGAGAGGCAAGGAACCAAAATTTATTGAGCATCCATATATTATCTCGTTTAATTTCCACATAGACTCAGCAAAGGGGTGGAGTTTCCTGGGAACTTTTTGAACTTATTAGCTTAC	chr20:35257712-35258032
20	35257799	35257913	35257858	115	35256858	35258858	ENCFF896RCP.4	110494	35115357	35147364	-	EDEM2	10027	35267885	35280043	-	AL121753.1	MMP24	3	TGAAGAAACTGGGTCAGGTGT,chr20,+,-647,0.70025	TGAAGAAACTGGGTCAGGTGT	chr20	+	-647	0.70025	31815	chr20:35258494-35258514	TCCCAAAGTACCTTGGAAATGTCTTTTACAGTTGTTTGCTTGAATCAGGATCCAAACAAGATCCACACACACATGGCTGACATGTCTCTTAAAGCCCTTTTTATTTAAAACACCCCCGTCCTACACACACGTTTCCCTCCATATATTTGTTGAAGAAACTGGGTCAGGTGTCCCGAGTATAATCATTTGGCGTGACTAGAATCAAGTTTACTTTTAATACGTCTCTCTTGCCCATAATTCCTGAATGTTGTTCATTAGATTTACAGGCTGACTAGATTCAAGTTCAATTTTTTTGGCAAGAATACTTCCTAGGTGGTGCTG	chr20:35258344-35258664
20	35263214	35263453	35263343	240	35262343	35264343	ENCFF107EWI.1	115979	35115357	35147364	-	EDEM2	4542	35267885	35280043	-	AL121753.1	MMP24	1	AACAAGACCTGGGGCAGGGGG,chr20,-,207,0.75145	AACAAGACCTGGGGCAGGGGG	chr20	-	207	0.75145	36446	chr20:35263125-35263145	GAGATGAGGTCAGCCAGGCTGGAAAGCAGGGCGCTTAATGCCATACAAAGGAATTTGGATCAGCTTCTTGGCTAGTGGGGGGTTTAAGTAGGAGTGGGGGTGGTGATACAATTAAATCACTCTGGCTGCAGTTGAGGGAGGATTAGAGGGAACAAGACCTGGGGCAGGGGGATCTGTTTGGATGCTGGGGTCCAGGCGAGAGATTGTGGGGAAAAGCAAGAGAGATCAGATTGTTACTGTGTCTGTGCAGAAAGAAGTAGACATAGGAGACTCCATTTTGTTATGTACTAAGAAAAATTCTTCTGCCTTGAGATTCTGTTA	chr20:35262975-35263295
20	35264868	35264993	35264940	126	35263940	35265940	ENCFF290ESJ.3	117576	35115357	35147364	-	EDEM2	2945	35267885	35280043	-	AL121753.1	MMP24	0	---	---					38034	chr20:35264722-35264742		chr20:35264572-35264892
20	35269042	35269362	35269202	321	35268202	35270202	ENCFF896RCP.2	121838	35115357	35147364	-	EDEM2	9709	35278911	35284985	-	EIF6	MMP24	2	CCCAAGACCTTGGGCAGGGAA,chr20,-,-734,0.77053	CCCAAGACCTTGGGCAGGGAA	chr20	-	-734	0.77053	43246	chr20:35269925-35269945	TCACCCCACCAATCTCGGCACATACAGATTCTCAGTCTCACTTTCTGACTTGATTTGTCAGAGGTCAGTGTCTCCGTTAGACTAGAGGGGCCCTCTGAGGACATCTGCCTCCCACCCCGCCTCTTCCAGTTTAGATGGGAAAAAGGAGGTCCCAAGACCTTGGGCAGGGAACTGTCCCACAGCACAGTCTACATTACCTTTGAAGAAGACAAATCTCCCATCGGCCCTTTCATAGGCTGCGTCGATGCGGGCAGGCAGGCCCTTCCAGAACTGCTCGATCTGCATGGGGTAGCCCTCCTGCACTCGGTTATTGCGCAGACG	chr20:35269775-35270095
20	35269042	35269362	35269202	321	35268202	35270202	ENCFF896RCP.2	121838	35115357	35147364	-	EDEM2	9709	35278911	35284985	-	EIF6	MMP24	2	GCCAGCAGTGTGGCCAGCAGG,chr20,-,900,0.71765	GCCAGCAGTGTGGCCAGCAGG	chr20	-	900	0.71765	41612	chr20:35268291-35268311		chr20:35268141-35268461
20	35269249	35269569	35269409	321	35268409	35270409	ENCFF896RCP.1	122045	35115357	35147364	-	EDEM2	9502	35278911	35284985	-	EIF6	MMP24	1	CCCAAGACCTTGGGCAGGGAA,chr20,-,-527,0.77053	CCCAAGACCTTGGGCAGGGAA	chr20	-	-527	0.77053	43246	chr20:35269925-35269945	TCACCCCACCAATCTCGGCACATACAGATTCTCAGTCTCACTTTCTGACTTGATTTGTCAGAGGTCAGTGTCTCCGTTAGACTAGAGGGGCCCTCTGAGGACATCTGCCTCCCACCCCGCCTCTTCCAGTTTAGATGGGAAAAAGGAGGTCCCAAGACCTTGGGCAGGGAACTGTCCCACAGCACAGTCTACATTACCTTTGAAGAAGACAAATCTCCCATCGGCCCTTTCATAGGCTGCGTCGATGCGGGCAGGCAGGCCCTTCCAGAACTGCTCGATCTGCATGGGGTAGCCCTCCTGCACTCGGTTATTGCGCAGACG	chr20:35269775-35270095
20	35269371	35269498	35269442	128	35268442	35270442	ENCFF290ESJ.4	122078	35115357	35147364	-	EDEM2	9469	35278911	35284985	-	EIF6	MMP24	1	CCCAAGACCTTGGGCAGGGAA,chr20,-,-494,0.77053	CCCAAGACCTTGGGCAGGGAA	chr20	-	-494	0.77053	43246	chr20:35269925-35269945	TCACCCCACCAATCTCGGCACATACAGATTCTCAGTCTCACTTTCTGACTTGATTTGTCAGAGGTCAGTGTCTCCGTTAGACTAGAGGGGCCCTCTGAGGACATCTGCCTCCCACCCCGCCTCTTCCAGTTTAGATGGGAAAAAGGAGGTCCCAAGACCTTGGGCAGGGAACTGTCCCACAGCACAGTCTACATTACCTTTGAAGAAGACAAATCTCCCATCGGCCCTTTCATAGGCTGCGTCGATGCGGGCAGGCAGGCCCTTCCAGAACTGCTCGATCTGCATGGGGTAGCCCTCCTGCACTCGGTTATTGCGCAGACG	chr20:35269775-35270095
20	35270407	35270817	35270612	411	35269612	35271612	ENCFF290ESJ.1	123248	35115357	35147364	-	EDEM2	8299	35278911	35284985	-	EIF6	MMP24	3	CCCAAGACCTTGGGCAGGGAA,chr20,-,676,0.77053	CCCAAGACCTTGGGCAGGGAA	chr20	-	676	0.77053	43246	chr20:35269925-35269945	TCACCCCACCAATCTCGGCACATACAGATTCTCAGTCTCACTTTCTGACTTGATTTGTCAGAGGTCAGTGTCTCCGTTAGACTAGAGGGGCCCTCTGAGGACATCTGCCTCCCACCCCGCCTCTTCCAGTTTAGATGGGAAAAAGGAGGTCCCAAGACCTTGGGCAGGGAACTGTCCCACAGCACAGTCTACATTACCTTTGAAGAAGACAAATCTCCCATCGGCCCTTTCATAGGCTGCGTCGATGCGGGCAGGCAGGCCCTTCCAGAACTGCTCGATCTGCATGGGGTAGCCCTCCTGCACTCGGTTATTGCGCAGACG	chr20:35269775-35270095
20	35270407	35270817	35270612	411	35269612	35271612	ENCFF290ESJ.1	123248	35115357	35147364	-	EDEM2	8299	35278911	35284985	-	EIF6	MMP24	3	TGAAGGGCAGGGGACAGCTGC,chr20,+,-98,0.7311	TGAAGGGCAGGGGACAGCTGC	chr20	+	-98	0.7311	44020	chr20:35270699-35270719	GGCCAAGGCTGGAAATTCATGGAATGTTTCCGAGCAGCAGAGAGCCAGAGGGCAGGAGGTGACAGACATGGCAGGGGCAGGGCAGCCATTTCTGAGGTGGTTCTGGAGCGCGCCACTCATGAGGCCCAAATGAGGGAGGAGCCGTGCAGCTGAAGGGCAGGGGACAGCTGCCAGGAGAGTCAGAGGGCCTCAGAAGTGGCTGAATACTCGGCCAGGCGCAGTGGCTCACGCCCGAAATCCCAGCACTTTGGGAGGCCAAGGCTGGCAGATCACCTGAGGTCAGGAGTTTGAGACCAGCCTGACCAACATGGTGAAACCACG	chr20:35270549-35270869
20	35270407	35270817	35270612	411	35269612	35271612	ENCFF290ESJ.1	123248	35115357	35147364	-	EDEM2	8299	35278911	35284985	-	EIF6	MMP24	3	CTCAGGTCCAGTGGGAGAGCC,chr20,+,-639,0.70058	CTCAGGTCCAGTGGGAGAGCC	chr20	+	-639	0.70058	44561	chr20:35271240-35271260	ACAGTGAGGCTAGGACTCCCTGTTGGGGACCTGGGAGGCAGAAGGTGATGAGGAGGGAGCCCCTCTGTGGTGCAGATGAGGAGCTCTGGGGAGCCAGCCAATGCAGAGCTGCCGGTAGGCCGAGGGAGGTCAGGGTTTCTGGCTCTGCTGCTCAGGTCCAGTGGGAGAGCCTCAGAGTCGGGTGTCACTGGTAGCAGGTTTGGGGAGTGGTAGTGCATATGCAAAGTCATGTAAGTGGCTGAGATCACCAGAGAGGAGAGAGGAGCAAGTCACATGAACAAAAGAGGGTGGGACTCGGAGCCCAGGCAGCAGAGGCAAGTT	chr20:35271090-35271410
20	35271088	35271498	35271293	411	35270293	35272293	ENCFF290ESJ.2	123929	35115357	35147364	-	EDEM2	7618	35278911	35284985	-	EIF6	MMP24	2	TGAAGGGCAGGGGACAGCTGC,chr20,+,583,0.7311	TGAAGGGCAGGGGACAGCTGC	chr20	+	583	0.7311	44020	chr20:35270699-35270719	GGCCAAGGCTGGAAATTCATGGAATGTTTCCGAGCAGCAGAGAGCCAGAGGGCAGGAGGTGACAGACATGGCAGGGGCAGGGCAGCCATTTCTGAGGTGGTTCTGGAGCGCGCCACTCATGAGGCCCAAATGAGGGAGGAGCCGTGCAGCTGAAGGGCAGGGGACAGCTGCCAGGAGAGTCAGAGGGCCTCAGAAGTGGCTGAATACTCGGCCAGGCGCAGTGGCTCACGCCCGAAATCCCAGCACTTTGGGAGGCCAAGGCTGGCAGATCACCTGAGGTCAGGAGTTTGAGACCAGCCTGACCAACATGGTGAAACCACG	chr20:35270549-35270869
20	35271088	35271498	35271293	411	35270293	35272293	ENCFF290ESJ.2	123929	35115357	35147364	-	EDEM2	7618	35278911	35284985	-	EIF6	MMP24	2	CTCAGGTCCAGTGGGAGAGCC,chr20,+,42,0.70058	CTCAGGTCCAGTGGGAGAGCC	chr20	+	42	0.70058	44561	chr20:35271240-35271260	ACAGTGAGGCTAGGACTCCCTGTTGGGGACCTGGGAGGCAGAAGGTGATGAGGAGGGAGCCCCTCTGTGGTGCAGATGAGGAGCTCTGGGGAGCCAGCCAATGCAGAGCTGCCGGTAGGCCGAGGGAGGTCAGGGTTTCTGGCTCTGCTGCTCAGGTCCAGTGGGAGAGCCTCAGAGTCGGGTGTCACTGGTAGCAGGTTTGGGGAGTGGTAGTGCATATGCAAAGTCATGTAAGTGGCTGAGATCACCAGAGAGGAGAGAGGAGCAAGTCACATGAACAAAAGAGGGTGGGACTCGGAGCCCAGGCAGCAGAGGCAAGTT	chr20:35271090-35271410
20	35275275	35275559	35275417	285	35274417	35276417	ENCFF713ZPE.1	128053	35115357	35147364	-	EDEM2	3494	35278911	35284985	-	EIF6	MMP24	5	GCCAGCACGCTGGAGACTGCC,chr20,-,-644,0.76941	GCCAGCACGCTGGAGACTGCC	chr20	-	-644	0.76941	49371	chr20:35276050-35276070	CTGGGACAAGAGATTTTGCTTGAGACAGCTCCCAGGGCAGCAGGAGTCCCTGTCTGTGCTACAGGGTAAGCCGACCCCAATCCCAGAGACCACAGGGTCGGGGGCAAGGCCCATGCAGGCTCAGTGAGCAGGGGTGGCATCCGAGACCCGGCCAGCACGCTGGAGACTGCCTGACACCTTTTTGGCTTTGGCAGAGAGCCAGTGGGCATTGATGAACCCATTGGCCTTGTCTAGGGCTCCTCAGTGACAAGCAGGGCTGCCTCCGCCGTACTGTGGAGCAAGGCAGGCCAAGCCCTAGGAACTCCTGCTGGAGACAGTGAA	chr20:35275900-35276220
20	35275275	35275559	35275417	285	35274417	35276417	ENCFF713ZPE.1	128053	35115357	35147364	-	EDEM2	3494	35278911	35284985	-	EIF6	MMP24	5	GACAGCTCCCAGGGCAGCAGG,chr20,-,-771,0.76401	GACAGCTCCCAGGGCAGCAGG	chr20	-	-771	0.76401	49498	chr20:35276177-35276197	GTACAAACCTATGAATCACTAATATCTCCGCAGTTGTTCCCTGCCTGTCCCAGGGAGCCTGCCCTTGGCCAAAATGAGAAAAAACAAGGATGATGACAGGGGACACAGCGGACCCACATGGGCACCTCTGGGACAAGAGATTTTGCTTGAGACAGCTCCCAGGGCAGCAGGAGTCCCTGTCTGTGCTACAGGGTAAGCCGACCCCAATCCCAGAGACCACAGGGTCGGGGGCAAGGCCCATGCAGGCTCAGTGAGCAGGGGTGGCATCCGAGACCCGGCCAGCACGCTGGAGACTGCCTGACACCTTTTTGGCTTTGGCAG	chr20:35276027-35276347
20	35275275	35275559	35275417	285	35274417	35276417	ENCFF713ZPE.1	128053	35115357	35147364	-	EDEM2	3494	35278911	35284985	-	EIF6	MMP24	5	TCCAGAAATGGGGTCAGCTTC,chr20,-,-84,0.71944	TCCAGAAATGGGGTCAGCTTC	chr20	-	-84	0.71944	48811	chr20:35275490-35275510	TCCCAGGCTCTGCCAGTGTTGGCCCTGCAGCCATCTCTGCCTCACCTAACTGGTGAGGCTGAGCTCCAGGCTGCAAGTGACAGACTGGAGCAAAGCTGGGGACAGTGACAATAGAGGGGAGTGGAGGACGGTCACAAACTCGGATCTTCCTCCAGAAATGGGGTCAGCTTCTGCCCCAGCTCTGTAGCCATAGGAGCAGAGCTCAGCTACTGGGGTGTCTGGGCGCTAGAGTGGCCTTAGCAGCACCTTGGTCCTTGTCGCCTGGGGGAGGGCCGCTATGCTGGCCTCATCACCAAGACAGTCACCTCTAGTTCACCTAAA	chr20:35275340-35275660
20	35275275	35275559	35275417	285	35274417	35276417	ENCFF713ZPE.1	128053	35115357	35147364	-	EDEM2	3494	35278911	35284985	-	EIF6	MMP24	5	AGCAGCACCTTGGTCCTTGTC,chr20,-,4,0.71598	AGCAGCACCTTGGTCCTTGTC	chr20	-	4	0.71598	48723	chr20:35275402-35275422	AGCAAAGCTGGGGACAGTGACAATAGAGGGGAGTGGAGGACGGTCACAAACTCGGATCTTCCTCCAGAAATGGGGTCAGCTTCTGCCCCAGCTCTGTAGCCATAGGAGCAGAGCTCAGCTACTGGGGTGTCTGGGCGCTAGAGTGGCCTTAGCAGCACCTTGGTCCTTGTCGCCTGGGGGAGGGCCGCTATGCTGGCCTCATCACCAAGACAGTCACCTCTAGTTCACCTAAAGCCTCAAGCAGCCTTTGCAAAATGGGACAGTAGTGACAGGACATTTAAATATTCACGATGTGACAGCTGGGTCCTTGTCAGACCCAGC	chr20:35275252-35275572
20	35275275	35275559	35275417	285	35274417	35276417	ENCFF713ZPE.1	128053	35115357	35147364	-	EDEM2	3494	35278911	35284985	-	EIF6	MMP24	5	GTGCTCACCAGGGCCAGCAGG,chr20,+,716,0.70663	GTGCTCACCAGGGCCAGCAGG	chr20	+	716	0.70663	48011	chr20:35274690-35274710	CCAGTTCAAGAACAAGACAGGCCCTCAGCCTGTCACCTACTATAAGCGGCCAGTCCAGGAATGGGTGTGAGCAGCCCAGAGCCCTCTCTATCCACTTGGTCTGGCCAGCCAGGCCCTTCCTCACCAGGGTCTGAGGGGCAGCTCTGGCCAGTGCTCACCAGGGCCAGCAGGGCCCTAGGCTGGGGTCGTACAGCTGAAGTGGTGGGTGCATTGGCCTAGGCTGAGCGTGGGGCAGGGAATTATGGGGGCTGTGCCCCAGGGTGGGTGTCTGGCACCCAGCTGCCAGCCTTCTGTCCTGGGCAAACTACTCCCTACTTAAGG	chr20:35274540-35274860
20	35275894	35276178	35276036	285	35275036	35277036	ENCFF713ZPE.2	128672	35115357	35147364	-	EDEM2	2875	35278911	35284985	-	EIF6	MMP24	4	GCCAGCACGCTGGAGACTGCC,chr20,-,-25,0.76941	GCCAGCACGCTGGAGACTGCC	chr20	-	-25	0.76941	49371	chr20:35276050-35276070	CTGGGACAAGAGATTTTGCTTGAGACAGCTCCCAGGGCAGCAGGAGTCCCTGTCTGTGCTACAGGGTAAGCCGACCCCAATCCCAGAGACCACAGGGTCGGGGGCAAGGCCCATGCAGGCTCAGTGAGCAGGGGTGGCATCCGAGACCCGGCCAGCACGCTGGAGACTGCCTGACACCTTTTTGGCTTTGGCAGAGAGCCAGTGGGCATTGATGAACCCATTGGCCTTGTCTAGGGCTCCTCAGTGACAAGCAGGGCTGCCTCCGCCGTACTGTGGAGCAAGGCAGGCCAAGCCCTAGGAACTCCTGCTGGAGACAGTGAA	chr20:35275900-35276220
20	35275894	35276178	35276036	285	35275036	35277036	ENCFF713ZPE.2	128672	35115357	35147364	-	EDEM2	2875	35278911	35284985	-	EIF6	MMP24	4	GACAGCTCCCAGGGCAGCAGG,chr20,-,-152,0.76401	GACAGCTCCCAGGGCAGCAGG	chr20	-	-152	0.76401	49498	chr20:35276177-35276197	GTACAAACCTATGAATCACTAATATCTCCGCAGTTGTTCCCTGCCTGTCCCAGGGAGCCTGCCCTTGGCCAAAATGAGAAAAAACAAGGATGATGACAGGGGACACAGCGGACCCACATGGGCACCTCTGGGACAAGAGATTTTGCTTGAGACAGCTCCCAGGGCAGCAGGAGTCCCTGTCTGTGCTACAGGGTAAGCCGACCCCAATCCCAGAGACCACAGGGTCGGGGGCAAGGCCCATGCAGGCTCAGTGAGCAGGGGTGGCATCCGAGACCCGGCCAGCACGCTGGAGACTGCCTGACACCTTTTTGGCTTTGGCAG	chr20:35276027-35276347
20	35275894	35276178	35276036	285	35275036	35277036	ENCFF713ZPE.2	128672	35115357	35147364	-	EDEM2	2875	35278911	35284985	-	EIF6	MMP24	4	TCCAGAAATGGGGTCAGCTTC,chr20,-,535,0.71944	TCCAGAAATGGGGTCAGCTTC	chr20	-	535	0.71944	48811	chr20:35275490-35275510	TCCCAGGCTCTGCCAGTGTTGGCCCTGCAGCCATCTCTGCCTCACCTAACTGGTGAGGCTGAGCTCCAGGCTGCAAGTGACAGACTGGAGCAAAGCTGGGGACAGTGACAATAGAGGGGAGTGGAGGACGGTCACAAACTCGGATCTTCCTCCAGAAATGGGGTCAGCTTCTGCCCCAGCTCTGTAGCCATAGGAGCAGAGCTCAGCTACTGGGGTGTCTGGGCGCTAGAGTGGCCTTAGCAGCACCTTGGTCCTTGTCGCCTGGGGGAGGGCCGCTATGCTGGCCTCATCACCAAGACAGTCACCTCTAGTTCACCTAAA	chr20:35275340-35275660
20	35275894	35276178	35276036	285	35275036	35277036	ENCFF713ZPE.2	128672	35115357	35147364	-	EDEM2	2875	35278911	35284985	-	EIF6	MMP24	4	AGCAGCACCTTGGTCCTTGTC,chr20,-,623,0.71598	AGCAGCACCTTGGTCCTTGTC	chr20	-	623	0.71598	48723	chr20:35275402-35275422	AGCAAAGCTGGGGACAGTGACAATAGAGGGGAGTGGAGGACGGTCACAAACTCGGATCTTCCTCCAGAAATGGGGTCAGCTTCTGCCCCAGCTCTGTAGCCATAGGAGCAGAGCTCAGCTACTGGGGTGTCTGGGCGCTAGAGTGGCCTTAGCAGCACCTTGGTCCTTGTCGCCTGGGGGAGGGCCGCTATGCTGGCCTCATCACCAAGACAGTCACCTCTAGTTCACCTAAAGCCTCAAGCAGCCTTTGCAAAATGGGACAGTAGTGACAGGACATTTAAATATTCACGATGTGACAGCTGGGTCCTTGTCAGACCCAGC	chr20:35275252-35275572
20	35227069	35227349	35227209	281	35226209	35228209	ENCFF023ZUW.1	79845	35115357	35147364	-	EDEM2	10969	35172073	35216240	+	PROCR	MMP24OS	5	TTCAGCACCGCGGACAGGGGC,chr20,+,4,0.95263	TTCAGCACCGCGGACAGGGGC	chr20	+	4	0.95263	515	chr20:35227194-35227214	GGCACCGGGGACGGGCCTGGGCCGGGCCGCACCTACTGCCGAGGTCGCGGAGGCGGCGCGCCGGGGGTCCGCGCCTTGGGTCCGGGCTGGCGCGGCCCAGGGCGGGGGCTGGGGAGGGCCTCGCCGAGGGCCGCCGAGGCCGGGAGCTGCTTCAGCACCGCGGACAGGGGCAGCGGGCGGGGGCCGAGCACGAGGGTCGGGTTTGTTGTGTTGGCAGTGGGGTGTGTGGCCTGCATGACTATGTGCGAGGGAAACCGTACAACGCCTCGGAGTAAATAGTAAGCGCAGCCAGTCTGTTGTGGGTTGGGAGAAGAAACCGAG	chr20:35227044-35227364
20	35227069	35227349	35227209	281	35226209	35228209	ENCFF023ZUW.1	79845	35115357	35147364	-	EDEM2	10969	35172073	35216240	+	PROCR	MMP24OS	5	GGCAGAACTAGGGCCAGCGGG,chr20,+,-285,0.78808	GGCAGAACTAGGGCCAGCGGG	chr20	+	-285	0.78808	804	chr20:35227483-35227503	CAGTCTGTTGTGGGTTGGGAGAAGAAACCGAGGATGTTCAAGCTGGAGAAGGGGGAGGGGGAGGGCGGAGGAAGGACTCGATCACTGTCTTCGTAGCTGAAGGGCTGTCAGGTGGAGGTAGGATAGACTTGTTCTAGCTTGGCCCCACAGGGCAGAACTAGGGCCAGCGGGAGTGGGGGTTGCAAGAAGACAAATTTGGGCTCGATATAGGAAGAAGTTTGTAACAATTGGAGCTGCTCAACCAGCTTAGGAGGCGGCGAGCTGCTCATCACTGGCATGTGCAAGTAAAAGCTCTCGGAGGGGATTGGATGGAGGCATGCA	chr20:35227333-35227653
20	35227069	35227349	35227209	281	35226209	35228209	ENCFF023ZUW.1	79845	35115357	35147364	-	EDEM2	10969	35172073	35216240	+	PROCR	MMP24OS	5	GGCGGCACCGGGGACGGGCCT,chr20,+,157,0.75445	GGCGGCACCGGGGACGGGCCT	chr20	+	157	0.75445	362	chr20:35227041-35227061	GGCGGCGGCGGCGGCGGCGGGGGCAGGGAACCGGGCAGCGGTGGCGGTGGCGGTGGCGCGGGCGGACGAGGCGGAGGCGCCCTTCGCCGGGCAGGTGGGGCTGGCGCGCGGGGCCGGGGCGCGGGCTCGGGGCATCCGGGCAGGGCGGGGGGCGGCACCGGGGACGGGCCTGGGCCGGGCCGCACCTACTGCCGAGGTCGCGGAGGCGGCGCGCCGGGGGTCCGCGCCTTGGGTCCGGGCTGGCGCGGCCCAGGGCGGGGGCTGGGGAGGGCCTCGCCGAGGGCCGCCGAGGCCGGGAGCTGCTTCAGCACCGCGGACAGG	chr20:35226891-35227211
20	35227069	35227349	35227209	281	35226209	35228209	ENCFF023ZUW.1	79845	35115357	35147364	-	EDEM2	10969	35172073	35216240	+	PROCR	MMP24OS	5	TCCGGAACCCTGGGGAGAGGG,chr20,-,848,0.74981	TCCGGAACCCTGGGGAGAGGG	chr20	-	848	0.74981	-329	chr20:35226350-35226370		chr20:35226200-35226520
20	35227069	35227349	35227209	281	35226209	35228209	ENCFF023ZUW.1	79845	35115357	35147364	-	EDEM2	10969	35172073	35216240	+	PROCR	MMP24OS	5	GGCAGCACCCGGGCGGGACCT,chr20,-,600,0.72704	GGCAGCACCCGGGCGGGACCT	chr20	-	600	0.72704	-81	chr20:35226598-35226618	CGCGGCGCGGCCGCCCCGGCTCCTCGGCATCCCGGCGGCGGGGCCCGCGCCCGGCCCGCCTGCCTTCGCCGCCGCCGCCGCCGCCTCGGCCGCCAGCGCGCCCCCGCCTCCGCGCGCCCCGCCCCGGTGGGGGGCGGCCGGGGGCGCGGGGGCAGCACCCGGGCGGGACCTGCGAGGGCAGTGGCTCCCCGACCAGCCCTGGGGCAGGGGCCGCGGAGCGGCGCTGGGGAGGGGGTTGCAGAGGCTAAAAGAACAGTTCTAGAGGCAGGGTCCGAAGGGGTGGAACTGGAGGTCGGGGTCTGGGGGTAGCCCTGAGCAGGA	chr20:35226448-35226768
20	35227074	35227375	35227213	302	35226213	35228213	ENCFF274BBE.1	79849	35115357	35147364	-	EDEM2	10973	35172073	35216240	+	PROCR	MMP24OS	5	TTCAGCACCGCGGACAGGGGC,chr20,+,8,0.95263	TTCAGCACCGCGGACAGGGGC	chr20	+	8	0.95263	515	chr20:35227194-35227214	GGCACCGGGGACGGGCCTGGGCCGGGCCGCACCTACTGCCGAGGTCGCGGAGGCGGCGCGCCGGGGGTCCGCGCCTTGGGTCCGGGCTGGCGCGGCCCAGGGCGGGGGCTGGGGAGGGCCTCGCCGAGGGCCGCCGAGGCCGGGAGCTGCTTCAGCACCGCGGACAGGGGCAGCGGGCGGGGGCCGAGCACGAGGGTCGGGTTTGTTGTGTTGGCAGTGGGGTGTGTGGCCTGCATGACTATGTGCGAGGGAAACCGTACAACGCCTCGGAGTAAATAGTAAGCGCAGCCAGTCTGTTGTGGGTTGGGAGAAGAAACCGAG	chr20:35227044-35227364
20	35227074	35227375	35227213	302	35226213	35228213	ENCFF274BBE.1	79849	35115357	35147364	-	EDEM2	10973	35172073	35216240	+	PROCR	MMP24OS	5	GGCAGAACTAGGGCCAGCGGG,chr20,+,-281,0.78808	GGCAGAACTAGGGCCAGCGGG	chr20	+	-281	0.78808	804	chr20:35227483-35227503	CAGTCTGTTGTGGGTTGGGAGAAGAAACCGAGGATGTTCAAGCTGGAGAAGGGGGAGGGGGAGGGCGGAGGAAGGACTCGATCACTGTCTTCGTAGCTGAAGGGCTGTCAGGTGGAGGTAGGATAGACTTGTTCTAGCTTGGCCCCACAGGGCAGAACTAGGGCCAGCGGGAGTGGGGGTTGCAAGAAGACAAATTTGGGCTCGATATAGGAAGAAGTTTGTAACAATTGGAGCTGCTCAACCAGCTTAGGAGGCGGCGAGCTGCTCATCACTGGCATGTGCAAGTAAAAGCTCTCGGAGGGGATTGGATGGAGGCATGCA	chr20:35227333-35227653
20	35227074	35227375	35227213	302	35226213	35228213	ENCFF274BBE.1	79849	35115357	35147364	-	EDEM2	10973	35172073	35216240	+	PROCR	MMP24OS	5	GGCGGCACCGGGGACGGGCCT,chr20,+,161,0.75445	GGCGGCACCGGGGACGGGCCT	chr20	+	161	0.75445	362	chr20:35227041-35227061	GGCGGCGGCGGCGGCGGCGGGGGCAGGGAACCGGGCAGCGGTGGCGGTGGCGGTGGCGCGGGCGGACGAGGCGGAGGCGCCCTTCGCCGGGCAGGTGGGGCTGGCGCGCGGGGCCGGGGCGCGGGCTCGGGGCATCCGGGCAGGGCGGGGGGCGGCACCGGGGACGGGCCTGGGCCGGGCCGCACCTACTGCCGAGGTCGCGGAGGCGGCGCGCCGGGGGTCCGCGCCTTGGGTCCGGGCTGGCGCGGCCCAGGGCGGGGGCTGGGGAGGGCCTCGCCGAGGGCCGCCGAGGCCGGGAGCTGCTTCAGCACCGCGGACAGG	chr20:35226891-35227211
20	35227074	35227375	35227213	302	35226213	35228213	ENCFF274BBE.1	79849	35115357	35147364	-	EDEM2	10973	35172073	35216240	+	PROCR	MMP24OS	5	TCCGGAACCCTGGGGAGAGGG,chr20,-,852,0.74981	TCCGGAACCCTGGGGAGAGGG	chr20	-	852	0.74981	-329	chr20:35226350-35226370		chr20:35226200-35226520
20	35227074	35227375	35227213	302	35226213	35228213	ENCFF274BBE.1	79849	35115357	35147364	-	EDEM2	10973	35172073	35216240	+	PROCR	MMP24OS	5	GGCAGCACCCGGGCGGGACCT,chr20,-,604,0.72704	GGCAGCACCCGGGCGGGACCT	chr20	-	604	0.72704	-81	chr20:35226598-35226618	CGCGGCGCGGCCGCCCCGGCTCCTCGGCATCCCGGCGGCGGGGCCCGCGCCCGGCCCGCCTGCCTTCGCCGCCGCCGCCGCCGCCTCGGCCGCCAGCGCGCCCCCGCCTCCGCGCGCCCCGCCCCGGTGGGGGGCGGCCGGGGGCGCGGGGGCAGCACCCGGGCGGGACCTGCGAGGGCAGTGGCTCCCCGACCAGCCCTGGGGCAGGGGCCGCGGAGCGGCGCTGGGGAGGGGGTTGCAGAGGCTAAAAGAACAGTTCTAGAGGCAGGGTCCGAAGGGGTGGAACTGGAGGTCGGGGTCTGGGGGTAGCCCTGAGCAGGA	chr20:35226448-35226768
20	35227147	35227271	35227218	125	35226218	35228218	ENCFF796YFZ.1	79854	35115357	35147364	-	EDEM2	10978	35172073	35216240	+	PROCR	MMP24OS	5	TTCAGCACCGCGGACAGGGGC,chr20,+,13,0.95263	TTCAGCACCGCGGACAGGGGC	chr20	+	13	0.95263	515	chr20:35227194-35227214	GGCACCGGGGACGGGCCTGGGCCGGGCCGCACCTACTGCCGAGGTCGCGGAGGCGGCGCGCCGGGGGTCCGCGCCTTGGGTCCGGGCTGGCGCGGCCCAGGGCGGGGGCTGGGGAGGGCCTCGCCGAGGGCCGCCGAGGCCGGGAGCTGCTTCAGCACCGCGGACAGGGGCAGCGGGCGGGGGCCGAGCACGAGGGTCGGGTTTGTTGTGTTGGCAGTGGGGTGTGTGGCCTGCATGACTATGTGCGAGGGAAACCGTACAACGCCTCGGAGTAAATAGTAAGCGCAGCCAGTCTGTTGTGGGTTGGGAGAAGAAACCGAG	chr20:35227044-35227364
20	35227147	35227271	35227218	125	35226218	35228218	ENCFF796YFZ.1	79854	35115357	35147364	-	EDEM2	10978	35172073	35216240	+	PROCR	MMP24OS	5	GGCAGAACTAGGGCCAGCGGG,chr20,+,-276,0.78808	GGCAGAACTAGGGCCAGCGGG	chr20	+	-276	0.78808	804	chr20:35227483-35227503	CAGTCTGTTGTGGGTTGGGAGAAGAAACCGAGGATGTTCAAGCTGGAGAAGGGGGAGGGGGAGGGCGGAGGAAGGACTCGATCACTGTCTTCGTAGCTGAAGGGCTGTCAGGTGGAGGTAGGATAGACTTGTTCTAGCTTGGCCCCACAGGGCAGAACTAGGGCCAGCGGGAGTGGGGGTTGCAAGAAGACAAATTTGGGCTCGATATAGGAAGAAGTTTGTAACAATTGGAGCTGCTCAACCAGCTTAGGAGGCGGCGAGCTGCTCATCACTGGCATGTGCAAGTAAAAGCTCTCGGAGGGGATTGGATGGAGGCATGCA	chr20:35227333-35227653
20	35227147	35227271	35227218	125	35226218	35228218	ENCFF796YFZ.1	79854	35115357	35147364	-	EDEM2	10978	35172073	35216240	+	PROCR	MMP24OS	5	GGCGGCACCGGGGACGGGCCT,chr20,+,166,0.75445	GGCGGCACCGGGGACGGGCCT	chr20	+	166	0.75445	362	chr20:35227041-35227061	GGCGGCGGCGGCGGCGGCGGGGGCAGGGAACCGGGCAGCGGTGGCGGTGGCGGTGGCGCGGGCGGACGAGGCGGAGGCGCCCTTCGCCGGGCAGGTGGGGCTGGCGCGCGGGGCCGGGGCGCGGGCTCGGGGCATCCGGGCAGGGCGGGGGGCGGCACCGGGGACGGGCCTGGGCCGGGCCGCACCTACTGCCGAGGTCGCGGAGGCGGCGCGCCGGGGGTCCGCGCCTTGGGTCCGGGCTGGCGCGGCCCAGGGCGGGGGCTGGGGAGGGCCTCGCCGAGGGCCGCCGAGGCCGGGAGCTGCTTCAGCACCGCGGACAGG	chr20:35226891-35227211
20	35227147	35227271	35227218	125	35226218	35228218	ENCFF796YFZ.1	79854	35115357	35147364	-	EDEM2	10978	35172073	35216240	+	PROCR	MMP24OS	5	TCCGGAACCCTGGGGAGAGGG,chr20,-,857,0.74981	TCCGGAACCCTGGGGAGAGGG	chr20	-	857	0.74981	-329	chr20:35226350-35226370		chr20:35226200-35226520
20	35227147	35227271	35227218	125	35226218	35228218	ENCFF796YFZ.1	79854	35115357	35147364	-	EDEM2	10978	35172073	35216240	+	PROCR	MMP24OS	5	GGCAGCACCCGGGCGGGACCT,chr20,-,609,0.72704	GGCAGCACCCGGGCGGGACCT	chr20	-	609	0.72704	-81	chr20:35226598-35226618	CGCGGCGCGGCCGCCCCGGCTCCTCGGCATCCCGGCGGCGGGGCCCGCGCCCGGCCCGCCTGCCTTCGCCGCCGCCGCCGCCGCCTCGGCCGCCAGCGCGCCCCCGCCTCCGCGCGCCCCGCCCCGGTGGGGGGCGGCCGGGGGCGCGGGGGCAGCACCCGGGCGGGACCTGCGAGGGCAGTGGCTCCCCGACCAGCCCTGGGGCAGGGGCCGCGGAGCGGCGCTGGGGAGGGGGTTGCAGAGGCTAAAAGAACAGTTCTAGAGGCAGGGTCCGAAGGGGTGGAACTGGAGGTCGGGGTCTGGGGGTAGCCCTGAGCAGGA	chr20:35226448-35226768
20	35227118	35227320	35227218	203	35226218	35228218	ENCFF208NUB.2	79854	35115357	35147364	-	EDEM2	10978	35172073	35216240	+	PROCR	MMP24OS	5	TTCAGCACCGCGGACAGGGGC,chr20,+,13,0.95263	TTCAGCACCGCGGACAGGGGC	chr20	+	13	0.95263	515	chr20:35227194-35227214	GGCACCGGGGACGGGCCTGGGCCGGGCCGCACCTACTGCCGAGGTCGCGGAGGCGGCGCGCCGGGGGTCCGCGCCTTGGGTCCGGGCTGGCGCGGCCCAGGGCGGGGGCTGGGGAGGGCCTCGCCGAGGGCCGCCGAGGCCGGGAGCTGCTTCAGCACCGCGGACAGGGGCAGCGGGCGGGGGCCGAGCACGAGGGTCGGGTTTGTTGTGTTGGCAGTGGGGTGTGTGGCCTGCATGACTATGTGCGAGGGAAACCGTACAACGCCTCGGAGTAAATAGTAAGCGCAGCCAGTCTGTTGTGGGTTGGGAGAAGAAACCGAG	chr20:35227044-35227364
20	35227118	35227320	35227218	203	35226218	35228218	ENCFF208NUB.2	79854	35115357	35147364	-	EDEM2	10978	35172073	35216240	+	PROCR	MMP24OS	5	GGCAGAACTAGGGCCAGCGGG,chr20,+,-276,0.78808	GGCAGAACTAGGGCCAGCGGG	chr20	+	-276	0.78808	804	chr20:35227483-35227503	CAGTCTGTTGTGGGTTGGGAGAAGAAACCGAGGATGTTCAAGCTGGAGAAGGGGGAGGGGGAGGGCGGAGGAAGGACTCGATCACTGTCTTCGTAGCTGAAGGGCTGTCAGGTGGAGGTAGGATAGACTTGTTCTAGCTTGGCCCCACAGGGCAGAACTAGGGCCAGCGGGAGTGGGGGTTGCAAGAAGACAAATTTGGGCTCGATATAGGAAGAAGTTTGTAACAATTGGAGCTGCTCAACCAGCTTAGGAGGCGGCGAGCTGCTCATCACTGGCATGTGCAAGTAAAAGCTCTCGGAGGGGATTGGATGGAGGCATGCA	chr20:35227333-35227653
20	35227118	35227320	35227218	203	35226218	35228218	ENCFF208NUB.2	79854	35115357	35147364	-	EDEM2	10978	35172073	35216240	+	PROCR	MMP24OS	5	GGCGGCACCGGGGACGGGCCT,chr20,+,166,0.75445	GGCGGCACCGGGGACGGGCCT	chr20	+	166	0.75445	362	chr20:35227041-35227061	GGCGGCGGCGGCGGCGGCGGGGGCAGGGAACCGGGCAGCGGTGGCGGTGGCGGTGGCGCGGGCGGACGAGGCGGAGGCGCCCTTCGCCGGGCAGGTGGGGCTGGCGCGCGGGGCCGGGGCGCGGGCTCGGGGCATCCGGGCAGGGCGGGGGGCGGCACCGGGGACGGGCCTGGGCCGGGCCGCACCTACTGCCGAGGTCGCGGAGGCGGCGCGCCGGGGGTCCGCGCCTTGGGTCCGGGCTGGCGCGGCCCAGGGCGGGGGCTGGGGAGGGCCTCGCCGAGGGCCGCCGAGGCCGGGAGCTGCTTCAGCACCGCGGACAGG	chr20:35226891-35227211
20	35227118	35227320	35227218	203	35226218	35228218	ENCFF208NUB.2	79854	35115357	35147364	-	EDEM2	10978	35172073	35216240	+	PROCR	MMP24OS	5	TCCGGAACCCTGGGGAGAGGG,chr20,-,857,0.74981	TCCGGAACCCTGGGGAGAGGG	chr20	-	857	0.74981	-329	chr20:35226350-35226370		chr20:35226200-35226520
20	35227118	35227320	35227218	203	35226218	35228218	ENCFF208NUB.2	79854	35115357	35147364	-	EDEM2	10978	35172073	35216240	+	PROCR	MMP24OS	5	GGCAGCACCCGGGCGGGACCT,chr20,-,609,0.72704	GGCAGCACCCGGGCGGGACCT	chr20	-	609	0.72704	-81	chr20:35226598-35226618	CGCGGCGCGGCCGCCCCGGCTCCTCGGCATCCCGGCGGCGGGGCCCGCGCCCGGCCCGCCTGCCTTCGCCGCCGCCGCCGCCGCCTCGGCCGCCAGCGCGCCCCCGCCTCCGCGCGCCCCGCCCCGGTGGGGGGCGGCCGGGGGCGCGGGGGCAGCACCCGGGCGGGACCTGCGAGGGCAGTGGCTCCCCGACCAGCCCTGGGGCAGGGGCCGCGGAGCGGCGCTGGGGAGGGGGTTGCAGAGGCTAAAAGAACAGTTCTAGAGGCAGGGTCCGAAGGGGTGGAACTGGAGGTCGGGGTCTGGGGGTAGCCCTGAGCAGGA	chr20:35226448-35226768
20	35227064	35227375	35227219	312	35226219	35228219	ENCFF713ZPE.3	79855	35115357	35147364	-	EDEM2	10979	35172073	35216240	+	PROCR	MMP24OS	5	TTCAGCACCGCGGACAGGGGC,chr20,+,14,0.95263	TTCAGCACCGCGGACAGGGGC	chr20	+	14	0.95263	515	chr20:35227194-35227214	GGCACCGGGGACGGGCCTGGGCCGGGCCGCACCTACTGCCGAGGTCGCGGAGGCGGCGCGCCGGGGGTCCGCGCCTTGGGTCCGGGCTGGCGCGGCCCAGGGCGGGGGCTGGGGAGGGCCTCGCCGAGGGCCGCCGAGGCCGGGAGCTGCTTCAGCACCGCGGACAGGGGCAGCGGGCGGGGGCCGAGCACGAGGGTCGGGTTTGTTGTGTTGGCAGTGGGGTGTGTGGCCTGCATGACTATGTGCGAGGGAAACCGTACAACGCCTCGGAGTAAATAGTAAGCGCAGCCAGTCTGTTGTGGGTTGGGAGAAGAAACCGAG	chr20:35227044-35227364
20	35227064	35227375	35227219	312	35226219	35228219	ENCFF713ZPE.3	79855	35115357	35147364	-	EDEM2	10979	35172073	35216240	+	PROCR	MMP24OS	5	GGCAGAACTAGGGCCAGCGGG,chr20,+,-275,0.78808	GGCAGAACTAGGGCCAGCGGG	chr20	+	-275	0.78808	804	chr20:35227483-35227503	CAGTCTGTTGTGGGTTGGGAGAAGAAACCGAGGATGTTCAAGCTGGAGAAGGGGGAGGGGGAGGGCGGAGGAAGGACTCGATCACTGTCTTCGTAGCTGAAGGGCTGTCAGGTGGAGGTAGGATAGACTTGTTCTAGCTTGGCCCCACAGGGCAGAACTAGGGCCAGCGGGAGTGGGGGTTGCAAGAAGACAAATTTGGGCTCGATATAGGAAGAAGTTTGTAACAATTGGAGCTGCTCAACCAGCTTAGGAGGCGGCGAGCTGCTCATCACTGGCATGTGCAAGTAAAAGCTCTCGGAGGGGATTGGATGGAGGCATGCA	chr20:35227333-35227653
20	35227064	35227375	35227219	312	35226219	35228219	ENCFF713ZPE.3	79855	35115357	35147364	-	EDEM2	10979	35172073	35216240	+	PROCR	MMP24OS	5	GGCGGCACCGGGGACGGGCCT,chr20,+,167,0.75445	GGCGGCACCGGGGACGGGCCT	chr20	+	167	0.75445	362	chr20:35227041-35227061	GGCGGCGGCGGCGGCGGCGGGGGCAGGGAACCGGGCAGCGGTGGCGGTGGCGGTGGCGCGGGCGGACGAGGCGGAGGCGCCCTTCGCCGGGCAGGTGGGGCTGGCGCGCGGGGCCGGGGCGCGGGCTCGGGGCATCCGGGCAGGGCGGGGGGCGGCACCGGGGACGGGCCTGGGCCGGGCCGCACCTACTGCCGAGGTCGCGGAGGCGGCGCGCCGGGGGTCCGCGCCTTGGGTCCGGGCTGGCGCGGCCCAGGGCGGGGGCTGGGGAGGGCCTCGCCGAGGGCCGCCGAGGCCGGGAGCTGCTTCAGCACCGCGGACAGG	chr20:35226891-35227211
20	35227064	35227375	35227219	312	35226219	35228219	ENCFF713ZPE.3	79855	35115357	35147364	-	EDEM2	10979	35172073	35216240	+	PROCR	MMP24OS	5	TCCGGAACCCTGGGGAGAGGG,chr20,-,858,0.74981	TCCGGAACCCTGGGGAGAGGG	chr20	-	858	0.74981	-329	chr20:35226350-35226370		chr20:35226200-35226520
20	35227064	35227375	35227219	312	35226219	35228219	ENCFF713ZPE.3	79855	35115357	35147364	-	EDEM2	10979	35172073	35216240	+	PROCR	MMP24OS	5	GGCAGCACCCGGGCGGGACCT,chr20,-,610,0.72704	GGCAGCACCCGGGCGGGACCT	chr20	-	610	0.72704	-81	chr20:35226598-35226618	CGCGGCGCGGCCGCCCCGGCTCCTCGGCATCCCGGCGGCGGGGCCCGCGCCCGGCCCGCCTGCCTTCGCCGCCGCCGCCGCCGCCTCGGCCGCCAGCGCGCCCCCGCCTCCGCGCGCCCCGCCCCGGTGGGGGGCGGCCGGGGGCGCGGGGGCAGCACCCGGGCGGGACCTGCGAGGGCAGTGGCTCCCCGACCAGCCCTGGGGCAGGGGCCGCGGAGCGGCGCTGGGGAGGGGGTTGCAGAGGCTAAAAGAACAGTTCTAGAGGCAGGGTCCGAAGGGGTGGAACTGGAGGTCGGGGTCTGGGGGTAGCCCTGAGCAGGA	chr20:35226448-35226768
20	35227078	35227388	35227219	311	35226219	35228219	ENCFF403CAJ.2	79855	35115357	35147364	-	EDEM2	10979	35172073	35216240	+	PROCR	MMP24OS	5	TTCAGCACCGCGGACAGGGGC,chr20,+,14,0.95263	TTCAGCACCGCGGACAGGGGC	chr20	+	14	0.95263	515	chr20:35227194-35227214	GGCACCGGGGACGGGCCTGGGCCGGGCCGCACCTACTGCCGAGGTCGCGGAGGCGGCGCGCCGGGGGTCCGCGCCTTGGGTCCGGGCTGGCGCGGCCCAGGGCGGGGGCTGGGGAGGGCCTCGCCGAGGGCCGCCGAGGCCGGGAGCTGCTTCAGCACCGCGGACAGGGGCAGCGGGCGGGGGCCGAGCACGAGGGTCGGGTTTGTTGTGTTGGCAGTGGGGTGTGTGGCCTGCATGACTATGTGCGAGGGAAACCGTACAACGCCTCGGAGTAAATAGTAAGCGCAGCCAGTCTGTTGTGGGTTGGGAGAAGAAACCGAG	chr20:35227044-35227364
20	35227078	35227388	35227219	311	35226219	35228219	ENCFF403CAJ.2	79855	35115357	35147364	-	EDEM2	10979	35172073	35216240	+	PROCR	MMP24OS	5	GGCAGAACTAGGGCCAGCGGG,chr20,+,-275,0.78808	GGCAGAACTAGGGCCAGCGGG	chr20	+	-275	0.78808	804	chr20:35227483-35227503	CAGTCTGTTGTGGGTTGGGAGAAGAAACCGAGGATGTTCAAGCTGGAGAAGGGGGAGGGGGAGGGCGGAGGAAGGACTCGATCACTGTCTTCGTAGCTGAAGGGCTGTCAGGTGGAGGTAGGATAGACTTGTTCTAGCTTGGCCCCACAGGGCAGAACTAGGGCCAGCGGGAGTGGGGGTTGCAAGAAGACAAATTTGGGCTCGATATAGGAAGAAGTTTGTAACAATTGGAGCTGCTCAACCAGCTTAGGAGGCGGCGAGCTGCTCATCACTGGCATGTGCAAGTAAAAGCTCTCGGAGGGGATTGGATGGAGGCATGCA	chr20:35227333-35227653
20	35227078	35227388	35227219	311	35226219	35228219	ENCFF403CAJ.2	79855	35115357	35147364	-	EDEM2	10979	35172073	35216240	+	PROCR	MMP24OS	5	GGCGGCACCGGGGACGGGCCT,chr20,+,167,0.75445	GGCGGCACCGGGGACGGGCCT	chr20	+	167	0.75445	362	chr20:35227041-35227061	GGCGGCGGCGGCGGCGGCGGGGGCAGGGAACCGGGCAGCGGTGGCGGTGGCGGTGGCGCGGGCGGACGAGGCGGAGGCGCCCTTCGCCGGGCAGGTGGGGCTGGCGCGCGGGGCCGGGGCGCGGGCTCGGGGCATCCGGGCAGGGCGGGGGGCGGCACCGGGGACGGGCCTGGGCCGGGCCGCACCTACTGCCGAGGTCGCGGAGGCGGCGCGCCGGGGGTCCGCGCCTTGGGTCCGGGCTGGCGCGGCCCAGGGCGGGGGCTGGGGAGGGCCTCGCCGAGGGCCGCCGAGGCCGGGAGCTGCTTCAGCACCGCGGACAGG	chr20:35226891-35227211
20	35227078	35227388	35227219	311	35226219	35228219	ENCFF403CAJ.2	79855	35115357	35147364	-	EDEM2	10979	35172073	35216240	+	PROCR	MMP24OS	5	TCCGGAACCCTGGGGAGAGGG,chr20,-,858,0.74981	TCCGGAACCCTGGGGAGAGGG	chr20	-	858	0.74981	-329	chr20:35226350-35226370		chr20:35226200-35226520
20	35227078	35227388	35227219	311	35226219	35228219	ENCFF403CAJ.2	79855	35115357	35147364	-	EDEM2	10979	35172073	35216240	+	PROCR	MMP24OS	5	GGCAGCACCCGGGCGGGACCT,chr20,-,610,0.72704	GGCAGCACCCGGGCGGGACCT	chr20	-	610	0.72704	-81	chr20:35226598-35226618	CGCGGCGCGGCCGCCCCGGCTCCTCGGCATCCCGGCGGCGGGGCCCGCGCCCGGCCCGCCTGCCTTCGCCGCCGCCGCCGCCGCCTCGGCCGCCAGCGCGCCCCCGCCTCCGCGCGCCCCGCCCCGGTGGGGGGCGGCCGGGGGCGCGGGGGCAGCACCCGGGCGGGACCTGCGAGGGCAGTGGCTCCCCGACCAGCCCTGGGGCAGGGGCCGCGGAGCGGCGCTGGGGAGGGGGTTGCAGAGGCTAAAAGAACAGTTCTAGAGGCAGGGTCCGAAGGGGTGGAACTGGAGGTCGGGGTCTGGGGGTAGCCCTGAGCAGGA	chr20:35226448-35226768
20	35227041	35227392	35227224	352	35226224	35228224	ENCFF896RCP.5	79860	35115357	35147364	-	EDEM2	10984	35172073	35216240	+	PROCR	MMP24OS	5	TTCAGCACCGCGGACAGGGGC,chr20,+,19,0.95263	TTCAGCACCGCGGACAGGGGC	chr20	+	19	0.95263	515	chr20:35227194-35227214	GGCACCGGGGACGGGCCTGGGCCGGGCCGCACCTACTGCCGAGGTCGCGGAGGCGGCGCGCCGGGGGTCCGCGCCTTGGGTCCGGGCTGGCGCGGCCCAGGGCGGGGGCTGGGGAGGGCCTCGCCGAGGGCCGCCGAGGCCGGGAGCTGCTTCAGCACCGCGGACAGGGGCAGCGGGCGGGGGCCGAGCACGAGGGTCGGGTTTGTTGTGTTGGCAGTGGGGTGTGTGGCCTGCATGACTATGTGCGAGGGAAACCGTACAACGCCTCGGAGTAAATAGTAAGCGCAGCCAGTCTGTTGTGGGTTGGGAGAAGAAACCGAG	chr20:35227044-35227364
20	35227041	35227392	35227224	352	35226224	35228224	ENCFF896RCP.5	79860	35115357	35147364	-	EDEM2	10984	35172073	35216240	+	PROCR	MMP24OS	5	GGCAGAACTAGGGCCAGCGGG,chr20,+,-270,0.78808	GGCAGAACTAGGGCCAGCGGG	chr20	+	-270	0.78808	804	chr20:35227483-35227503	CAGTCTGTTGTGGGTTGGGAGAAGAAACCGAGGATGTTCAAGCTGGAGAAGGGGGAGGGGGAGGGCGGAGGAAGGACTCGATCACTGTCTTCGTAGCTGAAGGGCTGTCAGGTGGAGGTAGGATAGACTTGTTCTAGCTTGGCCCCACAGGGCAGAACTAGGGCCAGCGGGAGTGGGGGTTGCAAGAAGACAAATTTGGGCTCGATATAGGAAGAAGTTTGTAACAATTGGAGCTGCTCAACCAGCTTAGGAGGCGGCGAGCTGCTCATCACTGGCATGTGCAAGTAAAAGCTCTCGGAGGGGATTGGATGGAGGCATGCA	chr20:35227333-35227653
20	35227041	35227392	35227224	352	35226224	35228224	ENCFF896RCP.5	79860	35115357	35147364	-	EDEM2	10984	35172073	35216240	+	PROCR	MMP24OS	5	GGCGGCACCGGGGACGGGCCT,chr20,+,172,0.75445	GGCGGCACCGGGGACGGGCCT	chr20	+	172	0.75445	362	chr20:35227041-35227061	GGCGGCGGCGGCGGCGGCGGGGGCAGGGAACCGGGCAGCGGTGGCGGTGGCGGTGGCGCGGGCGGACGAGGCGGAGGCGCCCTTCGCCGGGCAGGTGGGGCTGGCGCGCGGGGCCGGGGCGCGGGCTCGGGGCATCCGGGCAGGGCGGGGGGCGGCACCGGGGACGGGCCTGGGCCGGGCCGCACCTACTGCCGAGGTCGCGGAGGCGGCGCGCCGGGGGTCCGCGCCTTGGGTCCGGGCTGGCGCGGCCCAGGGCGGGGGCTGGGGAGGGCCTCGCCGAGGGCCGCCGAGGCCGGGAGCTGCTTCAGCACCGCGGACAGG	chr20:35226891-35227211
20	35227041	35227392	35227224	352	35226224	35228224	ENCFF896RCP.5	79860	35115357	35147364	-	EDEM2	10984	35172073	35216240	+	PROCR	MMP24OS	5	TCCGGAACCCTGGGGAGAGGG,chr20,-,863,0.74981	TCCGGAACCCTGGGGAGAGGG	chr20	-	863	0.74981	-329	chr20:35226350-35226370		chr20:35226200-35226520
20	35227041	35227392	35227224	352	35226224	35228224	ENCFF896RCP.5	79860	35115357	35147364	-	EDEM2	10984	35172073	35216240	+	PROCR	MMP24OS	5	GGCAGCACCCGGGCGGGACCT,chr20,-,615,0.72704	GGCAGCACCCGGGCGGGACCT	chr20	-	615	0.72704	-81	chr20:35226598-35226618	CGCGGCGCGGCCGCCCCGGCTCCTCGGCATCCCGGCGGCGGGGCCCGCGCCCGGCCCGCCTGCCTTCGCCGCCGCCGCCGCCGCCTCGGCCGCCAGCGCGCCCCCGCCTCCGCGCGCCCCGCCCCGGTGGGGGGCGGCCGGGGGCGCGGGGGCAGCACCCGGGCGGGACCTGCGAGGGCAGTGGCTCCCCGACCAGCCCTGGGGCAGGGGCCGCGGAGCGGCGCTGGGGAGGGGGTTGCAGAGGCTAAAAGAACAGTTCTAGAGGCAGGGTCCGAAGGGGTGGAACTGGAGGTCGGGGTCTGGGGGTAGCCCTGAGCAGGA	chr20:35226448-35226768
20	35227081	35227370	35227224	290	35226224	35228224	ENCFF668YET.3	79860	35115357	35147364	-	EDEM2	10984	35172073	35216240	+	PROCR	MMP24OS	5	TTCAGCACCGCGGACAGGGGC,chr20,+,19,0.95263	TTCAGCACCGCGGACAGGGGC	chr20	+	19	0.95263	515	chr20:35227194-35227214	GGCACCGGGGACGGGCCTGGGCCGGGCCGCACCTACTGCCGAGGTCGCGGAGGCGGCGCGCCGGGGGTCCGCGCCTTGGGTCCGGGCTGGCGCGGCCCAGGGCGGGGGCTGGGGAGGGCCTCGCCGAGGGCCGCCGAGGCCGGGAGCTGCTTCAGCACCGCGGACAGGGGCAGCGGGCGGGGGCCGAGCACGAGGGTCGGGTTTGTTGTGTTGGCAGTGGGGTGTGTGGCCTGCATGACTATGTGCGAGGGAAACCGTACAACGCCTCGGAGTAAATAGTAAGCGCAGCCAGTCTGTTGTGGGTTGGGAGAAGAAACCGAG	chr20:35227044-35227364
20	35227081	35227370	35227224	290	35226224	35228224	ENCFF668YET.3	79860	35115357	35147364	-	EDEM2	10984	35172073	35216240	+	PROCR	MMP24OS	5	GGCAGAACTAGGGCCAGCGGG,chr20,+,-270,0.78808	GGCAGAACTAGGGCCAGCGGG	chr20	+	-270	0.78808	804	chr20:35227483-35227503	CAGTCTGTTGTGGGTTGGGAGAAGAAACCGAGGATGTTCAAGCTGGAGAAGGGGGAGGGGGAGGGCGGAGGAAGGACTCGATCACTGTCTTCGTAGCTGAAGGGCTGTCAGGTGGAGGTAGGATAGACTTGTTCTAGCTTGGCCCCACAGGGCAGAACTAGGGCCAGCGGGAGTGGGGGTTGCAAGAAGACAAATTTGGGCTCGATATAGGAAGAAGTTTGTAACAATTGGAGCTGCTCAACCAGCTTAGGAGGCGGCGAGCTGCTCATCACTGGCATGTGCAAGTAAAAGCTCTCGGAGGGGATTGGATGGAGGCATGCA	chr20:35227333-35227653
20	35227081	35227370	35227224	290	35226224	35228224	ENCFF668YET.3	79860	35115357	35147364	-	EDEM2	10984	35172073	35216240	+	PROCR	MMP24OS	5	GGCGGCACCGGGGACGGGCCT,chr20,+,172,0.75445	GGCGGCACCGGGGACGGGCCT	chr20	+	172	0.75445	362	chr20:35227041-35227061	GGCGGCGGCGGCGGCGGCGGGGGCAGGGAACCGGGCAGCGGTGGCGGTGGCGGTGGCGCGGGCGGACGAGGCGGAGGCGCCCTTCGCCGGGCAGGTGGGGCTGGCGCGCGGGGCCGGGGCGCGGGCTCGGGGCATCCGGGCAGGGCGGGGGGCGGCACCGGGGACGGGCCTGGGCCGGGCCGCACCTACTGCCGAGGTCGCGGAGGCGGCGCGCCGGGGGTCCGCGCCTTGGGTCCGGGCTGGCGCGGCCCAGGGCGGGGGCTGGGGAGGGCCTCGCCGAGGGCCGCCGAGGCCGGGAGCTGCTTCAGCACCGCGGACAGG	chr20:35226891-35227211
20	35227081	35227370	35227224	290	35226224	35228224	ENCFF668YET.3	79860	35115357	35147364	-	EDEM2	10984	35172073	35216240	+	PROCR	MMP24OS	5	TCCGGAACCCTGGGGAGAGGG,chr20,-,863,0.74981	TCCGGAACCCTGGGGAGAGGG	chr20	-	863	0.74981	-329	chr20:35226350-35226370		chr20:35226200-35226520
20	35227081	35227370	35227224	290	35226224	35228224	ENCFF668YET.3	79860	35115357	35147364	-	EDEM2	10984	35172073	35216240	+	PROCR	MMP24OS	5	GGCAGCACCCGGGCGGGACCT,chr20,-,615,0.72704	GGCAGCACCCGGGCGGGACCT	chr20	-	615	0.72704	-81	chr20:35226598-35226618	CGCGGCGCGGCCGCCCCGGCTCCTCGGCATCCCGGCGGCGGGGCCCGCGCCCGGCCCGCCTGCCTTCGCCGCCGCCGCCGCCGCCTCGGCCGCCAGCGCGCCCCCGCCTCCGCGCGCCCCGCCCCGGTGGGGGGCGGCCGGGGGCGCGGGGGCAGCACCCGGGCGGGACCTGCGAGGGCAGTGGCTCCCCGACCAGCCCTGGGGCAGGGGCCGCGGAGCGGCGCTGGGGAGGGGGTTGCAGAGGCTAAAAGAACAGTTCTAGAGGCAGGGTCCGAAGGGGTGGAACTGGAGGTCGGGGTCTGGGGGTAGCCCTGAGCAGGA	chr20:35226448-35226768
20	35227074	35227377	35227224	304	35226224	35228224	ENCFF540FXB.3	79860	35115357	35147364	-	EDEM2	10984	35172073	35216240	+	PROCR	MMP24OS	5	TTCAGCACCGCGGACAGGGGC,chr20,+,19,0.95263	TTCAGCACCGCGGACAGGGGC	chr20	+	19	0.95263	515	chr20:35227194-35227214	GGCACCGGGGACGGGCCTGGGCCGGGCCGCACCTACTGCCGAGGTCGCGGAGGCGGCGCGCCGGGGGTCCGCGCCTTGGGTCCGGGCTGGCGCGGCCCAGGGCGGGGGCTGGGGAGGGCCTCGCCGAGGGCCGCCGAGGCCGGGAGCTGCTTCAGCACCGCGGACAGGGGCAGCGGGCGGGGGCCGAGCACGAGGGTCGGGTTTGTTGTGTTGGCAGTGGGGTGTGTGGCCTGCATGACTATGTGCGAGGGAAACCGTACAACGCCTCGGAGTAAATAGTAAGCGCAGCCAGTCTGTTGTGGGTTGGGAGAAGAAACCGAG	chr20:35227044-35227364
20	35227074	35227377	35227224	304	35226224	35228224	ENCFF540FXB.3	79860	35115357	35147364	-	EDEM2	10984	35172073	35216240	+	PROCR	MMP24OS	5	GGCAGAACTAGGGCCAGCGGG,chr20,+,-270,0.78808	GGCAGAACTAGGGCCAGCGGG	chr20	+	-270	0.78808	804	chr20:35227483-35227503	CAGTCTGTTGTGGGTTGGGAGAAGAAACCGAGGATGTTCAAGCTGGAGAAGGGGGAGGGGGAGGGCGGAGGAAGGACTCGATCACTGTCTTCGTAGCTGAAGGGCTGTCAGGTGGAGGTAGGATAGACTTGTTCTAGCTTGGCCCCACAGGGCAGAACTAGGGCCAGCGGGAGTGGGGGTTGCAAGAAGACAAATTTGGGCTCGATATAGGAAGAAGTTTGTAACAATTGGAGCTGCTCAACCAGCTTAGGAGGCGGCGAGCTGCTCATCACTGGCATGTGCAAGTAAAAGCTCTCGGAGGGGATTGGATGGAGGCATGCA	chr20:35227333-35227653
20	35227074	35227377	35227224	304	35226224	35228224	ENCFF540FXB.3	79860	35115357	35147364	-	EDEM2	10984	35172073	35216240	+	PROCR	MMP24OS	5	GGCGGCACCGGGGACGGGCCT,chr20,+,172,0.75445	GGCGGCACCGGGGACGGGCCT	chr20	+	172	0.75445	362	chr20:35227041-35227061	GGCGGCGGCGGCGGCGGCGGGGGCAGGGAACCGGGCAGCGGTGGCGGTGGCGGTGGCGCGGGCGGACGAGGCGGAGGCGCCCTTCGCCGGGCAGGTGGGGCTGGCGCGCGGGGCCGGGGCGCGGGCTCGGGGCATCCGGGCAGGGCGGGGGGCGGCACCGGGGACGGGCCTGGGCCGGGCCGCACCTACTGCCGAGGTCGCGGAGGCGGCGCGCCGGGGGTCCGCGCCTTGGGTCCGGGCTGGCGCGGCCCAGGGCGGGGGCTGGGGAGGGCCTCGCCGAGGGCCGCCGAGGCCGGGAGCTGCTTCAGCACCGCGGACAGG	chr20:35226891-35227211
20	35227074	35227377	35227224	304	35226224	35228224	ENCFF540FXB.3	79860	35115357	35147364	-	EDEM2	10984	35172073	35216240	+	PROCR	MMP24OS	5	TCCGGAACCCTGGGGAGAGGG,chr20,-,863,0.74981	TCCGGAACCCTGGGGAGAGGG	chr20	-	863	0.74981	-329	chr20:35226350-35226370		chr20:35226200-35226520
20	35227074	35227377	35227224	304	35226224	35228224	ENCFF540FXB.3	79860	35115357	35147364	-	EDEM2	10984	35172073	35216240	+	PROCR	MMP24OS	5	GGCAGCACCCGGGCGGGACCT,chr20,-,615,0.72704	GGCAGCACCCGGGCGGGACCT	chr20	-	615	0.72704	-81	chr20:35226598-35226618	CGCGGCGCGGCCGCCCCGGCTCCTCGGCATCCCGGCGGCGGGGCCCGCGCCCGGCCCGCCTGCCTTCGCCGCCGCCGCCGCCGCCTCGGCCGCCAGCGCGCCCCCGCCTCCGCGCGCCCCGCCCCGGTGGGGGGCGGCCGGGGGCGCGGGGGCAGCACCCGGGCGGGACCTGCGAGGGCAGTGGCTCCCCGACCAGCCCTGGGGCAGGGGCCGCGGAGCGGCGCTGGGGAGGGGGTTGCAGAGGCTAAAAGAACAGTTCTAGAGGCAGGGTCCGAAGGGGTGGAACTGGAGGTCGGGGTCTGGGGGTAGCCCTGAGCAGGA	chr20:35226448-35226768
20	35227071	35227392	35227228	322	35226228	35228228	ENCFF669XCW.4	79864	35115357	35147364	-	EDEM2	10988	35172073	35216240	+	PROCR	MMP24OS	5	TTCAGCACCGCGGACAGGGGC,chr20,+,23,0.95263	TTCAGCACCGCGGACAGGGGC	chr20	+	23	0.95263	515	chr20:35227194-35227214	GGCACCGGGGACGGGCCTGGGCCGGGCCGCACCTACTGCCGAGGTCGCGGAGGCGGCGCGCCGGGGGTCCGCGCCTTGGGTCCGGGCTGGCGCGGCCCAGGGCGGGGGCTGGGGAGGGCCTCGCCGAGGGCCGCCGAGGCCGGGAGCTGCTTCAGCACCGCGGACAGGGGCAGCGGGCGGGGGCCGAGCACGAGGGTCGGGTTTGTTGTGTTGGCAGTGGGGTGTGTGGCCTGCATGACTATGTGCGAGGGAAACCGTACAACGCCTCGGAGTAAATAGTAAGCGCAGCCAGTCTGTTGTGGGTTGGGAGAAGAAACCGAG	chr20:35227044-35227364
20	35227071	35227392	35227228	322	35226228	35228228	ENCFF669XCW.4	79864	35115357	35147364	-	EDEM2	10988	35172073	35216240	+	PROCR	MMP24OS	5	GGCAGAACTAGGGCCAGCGGG,chr20,+,-266,0.78808	GGCAGAACTAGGGCCAGCGGG	chr20	+	-266	0.78808	804	chr20:35227483-35227503	CAGTCTGTTGTGGGTTGGGAGAAGAAACCGAGGATGTTCAAGCTGGAGAAGGGGGAGGGGGAGGGCGGAGGAAGGACTCGATCACTGTCTTCGTAGCTGAAGGGCTGTCAGGTGGAGGTAGGATAGACTTGTTCTAGCTTGGCCCCACAGGGCAGAACTAGGGCCAGCGGGAGTGGGGGTTGCAAGAAGACAAATTTGGGCTCGATATAGGAAGAAGTTTGTAACAATTGGAGCTGCTCAACCAGCTTAGGAGGCGGCGAGCTGCTCATCACTGGCATGTGCAAGTAAAAGCTCTCGGAGGGGATTGGATGGAGGCATGCA	chr20:35227333-35227653
20	35227071	35227392	35227228	322	35226228	35228228	ENCFF669XCW.4	79864	35115357	35147364	-	EDEM2	10988	35172073	35216240	+	PROCR	MMP24OS	5	GGCGGCACCGGGGACGGGCCT,chr20,+,176,0.75445	GGCGGCACCGGGGACGGGCCT	chr20	+	176	0.75445	362	chr20:35227041-35227061	GGCGGCGGCGGCGGCGGCGGGGGCAGGGAACCGGGCAGCGGTGGCGGTGGCGGTGGCGCGGGCGGACGAGGCGGAGGCGCCCTTCGCCGGGCAGGTGGGGCTGGCGCGCGGGGCCGGGGCGCGGGCTCGGGGCATCCGGGCAGGGCGGGGGGCGGCACCGGGGACGGGCCTGGGCCGGGCCGCACCTACTGCCGAGGTCGCGGAGGCGGCGCGCCGGGGGTCCGCGCCTTGGGTCCGGGCTGGCGCGGCCCAGGGCGGGGGCTGGGGAGGGCCTCGCCGAGGGCCGCCGAGGCCGGGAGCTGCTTCAGCACCGCGGACAGG	chr20:35226891-35227211
20	35227071	35227392	35227228	322	35226228	35228228	ENCFF669XCW.4	79864	35115357	35147364	-	EDEM2	10988	35172073	35216240	+	PROCR	MMP24OS	5	TCCGGAACCCTGGGGAGAGGG,chr20,-,867,0.74981	TCCGGAACCCTGGGGAGAGGG	chr20	-	867	0.74981	-329	chr20:35226350-35226370		chr20:35226200-35226520
20	35227071	35227392	35227228	322	35226228	35228228	ENCFF669XCW.4	79864	35115357	35147364	-	EDEM2	10988	35172073	35216240	+	PROCR	MMP24OS	5	GGCAGCACCCGGGCGGGACCT,chr20,-,619,0.72704	GGCAGCACCCGGGCGGGACCT	chr20	-	619	0.72704	-81	chr20:35226598-35226618	CGCGGCGCGGCCGCCCCGGCTCCTCGGCATCCCGGCGGCGGGGCCCGCGCCCGGCCCGCCTGCCTTCGCCGCCGCCGCCGCCGCCTCGGCCGCCAGCGCGCCCCCGCCTCCGCGCGCCCCGCCCCGGTGGGGGGCGGCCGGGGGCGCGGGGGCAGCACCCGGGCGGGACCTGCGAGGGCAGTGGCTCCCCGACCAGCCCTGGGGCAGGGGCCGCGGAGCGGCGCTGGGGAGGGGGTTGCAGAGGCTAAAAGAACAGTTCTAGAGGCAGGGTCCGAAGGGGTGGAACTGGAGGTCGGGGTCTGGGGGTAGCCCTGAGCAGGA	chr20:35226448-35226768
20	35227005	35227374	35227229	370	35226229	35228229	ENCFF986RRJ.1	79865	35115357	35147364	-	EDEM2	10989	35172073	35216240	+	PROCR	MMP24OS	5	TTCAGCACCGCGGACAGGGGC,chr20,+,24,0.95263	TTCAGCACCGCGGACAGGGGC	chr20	+	24	0.95263	515	chr20:35227194-35227214	GGCACCGGGGACGGGCCTGGGCCGGGCCGCACCTACTGCCGAGGTCGCGGAGGCGGCGCGCCGGGGGTCCGCGCCTTGGGTCCGGGCTGGCGCGGCCCAGGGCGGGGGCTGGGGAGGGCCTCGCCGAGGGCCGCCGAGGCCGGGAGCTGCTTCAGCACCGCGGACAGGGGCAGCGGGCGGGGGCCGAGCACGAGGGTCGGGTTTGTTGTGTTGGCAGTGGGGTGTGTGGCCTGCATGACTATGTGCGAGGGAAACCGTACAACGCCTCGGAGTAAATAGTAAGCGCAGCCAGTCTGTTGTGGGTTGGGAGAAGAAACCGAG	chr20:35227044-35227364
20	35227005	35227374	35227229	370	35226229	35228229	ENCFF986RRJ.1	79865	35115357	35147364	-	EDEM2	10989	35172073	35216240	+	PROCR	MMP24OS	5	GGCAGAACTAGGGCCAGCGGG,chr20,+,-265,0.78808	GGCAGAACTAGGGCCAGCGGG	chr20	+	-265	0.78808	804	chr20:35227483-35227503	CAGTCTGTTGTGGGTTGGGAGAAGAAACCGAGGATGTTCAAGCTGGAGAAGGGGGAGGGGGAGGGCGGAGGAAGGACTCGATCACTGTCTTCGTAGCTGAAGGGCTGTCAGGTGGAGGTAGGATAGACTTGTTCTAGCTTGGCCCCACAGGGCAGAACTAGGGCCAGCGGGAGTGGGGGTTGCAAGAAGACAAATTTGGGCTCGATATAGGAAGAAGTTTGTAACAATTGGAGCTGCTCAACCAGCTTAGGAGGCGGCGAGCTGCTCATCACTGGCATGTGCAAGTAAAAGCTCTCGGAGGGGATTGGATGGAGGCATGCA	chr20:35227333-35227653
20	35227005	35227374	35227229	370	35226229	35228229	ENCFF986RRJ.1	79865	35115357	35147364	-	EDEM2	10989	35172073	35216240	+	PROCR	MMP24OS	5	GGCGGCACCGGGGACGGGCCT,chr20,+,177,0.75445	GGCGGCACCGGGGACGGGCCT	chr20	+	177	0.75445	362	chr20:35227041-35227061	GGCGGCGGCGGCGGCGGCGGGGGCAGGGAACCGGGCAGCGGTGGCGGTGGCGGTGGCGCGGGCGGACGAGGCGGAGGCGCCCTTCGCCGGGCAGGTGGGGCTGGCGCGCGGGGCCGGGGCGCGGGCTCGGGGCATCCGGGCAGGGCGGGGGGCGGCACCGGGGACGGGCCTGGGCCGGGCCGCACCTACTGCCGAGGTCGCGGAGGCGGCGCGCCGGGGGTCCGCGCCTTGGGTCCGGGCTGGCGCGGCCCAGGGCGGGGGCTGGGGAGGGCCTCGCCGAGGGCCGCCGAGGCCGGGAGCTGCTTCAGCACCGCGGACAGG	chr20:35226891-35227211
20	35227005	35227374	35227229	370	35226229	35228229	ENCFF986RRJ.1	79865	35115357	35147364	-	EDEM2	10989	35172073	35216240	+	PROCR	MMP24OS	5	TCCGGAACCCTGGGGAGAGGG,chr20,-,868,0.74981	TCCGGAACCCTGGGGAGAGGG	chr20	-	868	0.74981	-329	chr20:35226350-35226370		chr20:35226200-35226520
20	35227005	35227374	35227229	370	35226229	35228229	ENCFF986RRJ.1	79865	35115357	35147364	-	EDEM2	10989	35172073	35216240	+	PROCR	MMP24OS	5	GGCAGCACCCGGGCGGGACCT,chr20,-,620,0.72704	GGCAGCACCCGGGCGGGACCT	chr20	-	620	0.72704	-81	chr20:35226598-35226618	CGCGGCGCGGCCGCCCCGGCTCCTCGGCATCCCGGCGGCGGGGCCCGCGCCCGGCCCGCCTGCCTTCGCCGCCGCCGCCGCCGCCTCGGCCGCCAGCGCGCCCCCGCCTCCGCGCGCCCCGCCCCGGTGGGGGGCGGCCGGGGGCGCGGGGGCAGCACCCGGGCGGGACCTGCGAGGGCAGTGGCTCCCCGACCAGCCCTGGGGCAGGGGCCGCGGAGCGGCGCTGGGGAGGGGGTTGCAGAGGCTAAAAGAACAGTTCTAGAGGCAGGGTCCGAAGGGGTGGAACTGGAGGTCGGGGTCTGGGGGTAGCCCTGAGCAGGA	chr20:35226448-35226768
20	35227077	35227368	35227229	292	35226229	35228229	ENCFF313CII.1	79865	35115357	35147364	-	EDEM2	10989	35172073	35216240	+	PROCR	MMP24OS	5	TTCAGCACCGCGGACAGGGGC,chr20,+,24,0.95263	TTCAGCACCGCGGACAGGGGC	chr20	+	24	0.95263	515	chr20:35227194-35227214	GGCACCGGGGACGGGCCTGGGCCGGGCCGCACCTACTGCCGAGGTCGCGGAGGCGGCGCGCCGGGGGTCCGCGCCTTGGGTCCGGGCTGGCGCGGCCCAGGGCGGGGGCTGGGGAGGGCCTCGCCGAGGGCCGCCGAGGCCGGGAGCTGCTTCAGCACCGCGGACAGGGGCAGCGGGCGGGGGCCGAGCACGAGGGTCGGGTTTGTTGTGTTGGCAGTGGGGTGTGTGGCCTGCATGACTATGTGCGAGGGAAACCGTACAACGCCTCGGAGTAAATAGTAAGCGCAGCCAGTCTGTTGTGGGTTGGGAGAAGAAACCGAG	chr20:35227044-35227364
20	35227077	35227368	35227229	292	35226229	35228229	ENCFF313CII.1	79865	35115357	35147364	-	EDEM2	10989	35172073	35216240	+	PROCR	MMP24OS	5	GGCAGAACTAGGGCCAGCGGG,chr20,+,-265,0.78808	GGCAGAACTAGGGCCAGCGGG	chr20	+	-265	0.78808	804	chr20:35227483-35227503	CAGTCTGTTGTGGGTTGGGAGAAGAAACCGAGGATGTTCAAGCTGGAGAAGGGGGAGGGGGAGGGCGGAGGAAGGACTCGATCACTGTCTTCGTAGCTGAAGGGCTGTCAGGTGGAGGTAGGATAGACTTGTTCTAGCTTGGCCCCACAGGGCAGAACTAGGGCCAGCGGGAGTGGGGGTTGCAAGAAGACAAATTTGGGCTCGATATAGGAAGAAGTTTGTAACAATTGGAGCTGCTCAACCAGCTTAGGAGGCGGCGAGCTGCTCATCACTGGCATGTGCAAGTAAAAGCTCTCGGAGGGGATTGGATGGAGGCATGCA	chr20:35227333-35227653
20	35227077	35227368	35227229	292	35226229	35228229	ENCFF313CII.1	79865	35115357	35147364	-	EDEM2	10989	35172073	35216240	+	PROCR	MMP24OS	5	GGCGGCACCGGGGACGGGCCT,chr20,+,177,0.75445	GGCGGCACCGGGGACGGGCCT	chr20	+	177	0.75445	362	chr20:35227041-35227061	GGCGGCGGCGGCGGCGGCGGGGGCAGGGAACCGGGCAGCGGTGGCGGTGGCGGTGGCGCGGGCGGACGAGGCGGAGGCGCCCTTCGCCGGGCAGGTGGGGCTGGCGCGCGGGGCCGGGGCGCGGGCTCGGGGCATCCGGGCAGGGCGGGGGGCGGCACCGGGGACGGGCCTGGGCCGGGCCGCACCTACTGCCGAGGTCGCGGAGGCGGCGCGCCGGGGGTCCGCGCCTTGGGTCCGGGCTGGCGCGGCCCAGGGCGGGGGCTGGGGAGGGCCTCGCCGAGGGCCGCCGAGGCCGGGAGCTGCTTCAGCACCGCGGACAGG	chr20:35226891-35227211
20	35227077	35227368	35227229	292	35226229	35228229	ENCFF313CII.1	79865	35115357	35147364	-	EDEM2	10989	35172073	35216240	+	PROCR	MMP24OS	5	TCCGGAACCCTGGGGAGAGGG,chr20,-,868,0.74981	TCCGGAACCCTGGGGAGAGGG	chr20	-	868	0.74981	-329	chr20:35226350-35226370		chr20:35226200-35226520
20	35227077	35227368	35227229	292	35226229	35228229	ENCFF313CII.1	79865	35115357	35147364	-	EDEM2	10989	35172073	35216240	+	PROCR	MMP24OS	5	GGCAGCACCCGGGCGGGACCT,chr20,-,620,0.72704	GGCAGCACCCGGGCGGGACCT	chr20	-	620	0.72704	-81	chr20:35226598-35226618	CGCGGCGCGGCCGCCCCGGCTCCTCGGCATCCCGGCGGCGGGGCCCGCGCCCGGCCCGCCTGCCTTCGCCGCCGCCGCCGCCGCCTCGGCCGCCAGCGCGCCCCCGCCTCCGCGCGCCCCGCCCCGGTGGGGGGCGGCCGGGGGCGCGGGGGCAGCACCCGGGCGGGACCTGCGAGGGCAGTGGCTCCCCGACCAGCCCTGGGGCAGGGGCCGCGGAGCGGCGCTGGGGAGGGGGTTGCAGAGGCTAAAAGAACAGTTCTAGAGGCAGGGTCCGAAGGGGTGGAACTGGAGGTCGGGGTCTGGGGGTAGCCCTGAGCAGGA	chr20:35226448-35226768
20	35227033	35227563	35227234	531	35226234	35228234	ENCFF107EWI.3	79870	35115357	35147364	-	EDEM2	10994	35172073	35216240	+	PROCR	MMP24OS	5	TTCAGCACCGCGGACAGGGGC,chr20,+,29,0.95263	TTCAGCACCGCGGACAGGGGC	chr20	+	29	0.95263	515	chr20:35227194-35227214	GGCACCGGGGACGGGCCTGGGCCGGGCCGCACCTACTGCCGAGGTCGCGGAGGCGGCGCGCCGGGGGTCCGCGCCTTGGGTCCGGGCTGGCGCGGCCCAGGGCGGGGGCTGGGGAGGGCCTCGCCGAGGGCCGCCGAGGCCGGGAGCTGCTTCAGCACCGCGGACAGGGGCAGCGGGCGGGGGCCGAGCACGAGGGTCGGGTTTGTTGTGTTGGCAGTGGGGTGTGTGGCCTGCATGACTATGTGCGAGGGAAACCGTACAACGCCTCGGAGTAAATAGTAAGCGCAGCCAGTCTGTTGTGGGTTGGGAGAAGAAACCGAG	chr20:35227044-35227364
20	35227033	35227563	35227234	531	35226234	35228234	ENCFF107EWI.3	79870	35115357	35147364	-	EDEM2	10994	35172073	35216240	+	PROCR	MMP24OS	5	GGCAGAACTAGGGCCAGCGGG,chr20,+,-260,0.78808	GGCAGAACTAGGGCCAGCGGG	chr20	+	-260	0.78808	804	chr20:35227483-35227503	CAGTCTGTTGTGGGTTGGGAGAAGAAACCGAGGATGTTCAAGCTGGAGAAGGGGGAGGGGGAGGGCGGAGGAAGGACTCGATCACTGTCTTCGTAGCTGAAGGGCTGTCAGGTGGAGGTAGGATAGACTTGTTCTAGCTTGGCCCCACAGGGCAGAACTAGGGCCAGCGGGAGTGGGGGTTGCAAGAAGACAAATTTGGGCTCGATATAGGAAGAAGTTTGTAACAATTGGAGCTGCTCAACCAGCTTAGGAGGCGGCGAGCTGCTCATCACTGGCATGTGCAAGTAAAAGCTCTCGGAGGGGATTGGATGGAGGCATGCA	chr20:35227333-35227653
20	35227033	35227563	35227234	531	35226234	35228234	ENCFF107EWI.3	79870	35115357	35147364	-	EDEM2	10994	35172073	35216240	+	PROCR	MMP24OS	5	GGCGGCACCGGGGACGGGCCT,chr20,+,182,0.75445	GGCGGCACCGGGGACGGGCCT	chr20	+	182	0.75445	362	chr20:35227041-35227061	GGCGGCGGCGGCGGCGGCGGGGGCAGGGAACCGGGCAGCGGTGGCGGTGGCGGTGGCGCGGGCGGACGAGGCGGAGGCGCCCTTCGCCGGGCAGGTGGGGCTGGCGCGCGGGGCCGGGGCGCGGGCTCGGGGCATCCGGGCAGGGCGGGGGGCGGCACCGGGGACGGGCCTGGGCCGGGCCGCACCTACTGCCGAGGTCGCGGAGGCGGCGCGCCGGGGGTCCGCGCCTTGGGTCCGGGCTGGCGCGGCCCAGGGCGGGGGCTGGGGAGGGCCTCGCCGAGGGCCGCCGAGGCCGGGAGCTGCTTCAGCACCGCGGACAGG	chr20:35226891-35227211
20	35227033	35227563	35227234	531	35226234	35228234	ENCFF107EWI.3	79870	35115357	35147364	-	EDEM2	10994	35172073	35216240	+	PROCR	MMP24OS	5	TCCGGAACCCTGGGGAGAGGG,chr20,-,873,0.74981	TCCGGAACCCTGGGGAGAGGG	chr20	-	873	0.74981	-329	chr20:35226350-35226370		chr20:35226200-35226520
20	35227033	35227563	35227234	531	35226234	35228234	ENCFF107EWI.3	79870	35115357	35147364	-	EDEM2	10994	35172073	35216240	+	PROCR	MMP24OS	5	GGCAGCACCCGGGCGGGACCT,chr20,-,625,0.72704	GGCAGCACCCGGGCGGGACCT	chr20	-	625	0.72704	-81	chr20:35226598-35226618	CGCGGCGCGGCCGCCCCGGCTCCTCGGCATCCCGGCGGCGGGGCCCGCGCCCGGCCCGCCTGCCTTCGCCGCCGCCGCCGCCGCCTCGGCCGCCAGCGCGCCCCCGCCTCCGCGCGCCCCGCCCCGGTGGGGGGCGGCCGGGGGCGCGGGGGCAGCACCCGGGCGGGACCTGCGAGGGCAGTGGCTCCCCGACCAGCCCTGGGGCAGGGGCCGCGGAGCGGCGCTGGGGAGGGGGTTGCAGAGGCTAAAAGAACAGTTCTAGAGGCAGGGTCCGAAGGGGTGGAACTGGAGGTCGGGGTCTGGGGGTAGCCCTGAGCAGGA	chr20:35226448-35226768
20	35227003	35227508	35227237	506	35226237	35228237	ENCFF290ESJ.5	79873	35115357	35147364	-	EDEM2	10997	35172073	35216240	+	PROCR	MMP24OS	5	TTCAGCACCGCGGACAGGGGC,chr20,+,32,0.95263	TTCAGCACCGCGGACAGGGGC	chr20	+	32	0.95263	515	chr20:35227194-35227214	GGCACCGGGGACGGGCCTGGGCCGGGCCGCACCTACTGCCGAGGTCGCGGAGGCGGCGCGCCGGGGGTCCGCGCCTTGGGTCCGGGCTGGCGCGGCCCAGGGCGGGGGCTGGGGAGGGCCTCGCCGAGGGCCGCCGAGGCCGGGAGCTGCTTCAGCACCGCGGACAGGGGCAGCGGGCGGGGGCCGAGCACGAGGGTCGGGTTTGTTGTGTTGGCAGTGGGGTGTGTGGCCTGCATGACTATGTGCGAGGGAAACCGTACAACGCCTCGGAGTAAATAGTAAGCGCAGCCAGTCTGTTGTGGGTTGGGAGAAGAAACCGAG	chr20:35227044-35227364
20	35227003	35227508	35227237	506	35226237	35228237	ENCFF290ESJ.5	79873	35115357	35147364	-	EDEM2	10997	35172073	35216240	+	PROCR	MMP24OS	5	GGCAGAACTAGGGCCAGCGGG,chr20,+,-257,0.78808	GGCAGAACTAGGGCCAGCGGG	chr20	+	-257	0.78808	804	chr20:35227483-35227503	CAGTCTGTTGTGGGTTGGGAGAAGAAACCGAGGATGTTCAAGCTGGAGAAGGGGGAGGGGGAGGGCGGAGGAAGGACTCGATCACTGTCTTCGTAGCTGAAGGGCTGTCAGGTGGAGGTAGGATAGACTTGTTCTAGCTTGGCCCCACAGGGCAGAACTAGGGCCAGCGGGAGTGGGGGTTGCAAGAAGACAAATTTGGGCTCGATATAGGAAGAAGTTTGTAACAATTGGAGCTGCTCAACCAGCTTAGGAGGCGGCGAGCTGCTCATCACTGGCATGTGCAAGTAAAAGCTCTCGGAGGGGATTGGATGGAGGCATGCA	chr20:35227333-35227653
20	35227003	35227508	35227237	506	35226237	35228237	ENCFF290ESJ.5	79873	35115357	35147364	-	EDEM2	10997	35172073	35216240	+	PROCR	MMP24OS	5	GGCGGCACCGGGGACGGGCCT,chr20,+,185,0.75445	GGCGGCACCGGGGACGGGCCT	chr20	+	185	0.75445	362	chr20:35227041-35227061	GGCGGCGGCGGCGGCGGCGGGGGCAGGGAACCGGGCAGCGGTGGCGGTGGCGGTGGCGCGGGCGGACGAGGCGGAGGCGCCCTTCGCCGGGCAGGTGGGGCTGGCGCGCGGGGCCGGGGCGCGGGCTCGGGGCATCCGGGCAGGGCGGGGGGCGGCACCGGGGACGGGCCTGGGCCGGGCCGCACCTACTGCCGAGGTCGCGGAGGCGGCGCGCCGGGGGTCCGCGCCTTGGGTCCGGGCTGGCGCGGCCCAGGGCGGGGGCTGGGGAGGGCCTCGCCGAGGGCCGCCGAGGCCGGGAGCTGCTTCAGCACCGCGGACAGG	chr20:35226891-35227211
20	35227003	35227508	35227237	506	35226237	35228237	ENCFF290ESJ.5	79873	35115357	35147364	-	EDEM2	10997	35172073	35216240	+	PROCR	MMP24OS	5	TCCGGAACCCTGGGGAGAGGG,chr20,-,876,0.74981	TCCGGAACCCTGGGGAGAGGG	chr20	-	876	0.74981	-329	chr20:35226350-35226370		chr20:35226200-35226520
20	35227003	35227508	35227237	506	35226237	35228237	ENCFF290ESJ.5	79873	35115357	35147364	-	EDEM2	10997	35172073	35216240	+	PROCR	MMP24OS	5	GGCAGCACCCGGGCGGGACCT,chr20,-,628,0.72704	GGCAGCACCCGGGCGGGACCT	chr20	-	628	0.72704	-81	chr20:35226598-35226618	CGCGGCGCGGCCGCCCCGGCTCCTCGGCATCCCGGCGGCGGGGCCCGCGCCCGGCCCGCCTGCCTTCGCCGCCGCCGCCGCCGCCTCGGCCGCCAGCGCGCCCCCGCCTCCGCGCGCCCCGCCCCGGTGGGGGGCGGCCGGGGGCGCGGGGGCAGCACCCGGGCGGGACCTGCGAGGGCAGTGGCTCCCCGACCAGCCCTGGGGCAGGGGCCGCGGAGCGGCGCTGGGGAGGGGGTTGCAGAGGCTAAAAGAACAGTTCTAGAGGCAGGGTCCGAAGGGGTGGAACTGGAGGTCGGGGTCTGGGGGTAGCCCTGAGCAGGA	chr20:35226448-35226768
20	35227080	35227467	35227238	388	35226238	35228238	ENCFF779CWH.2	79874	35115357	35147364	-	EDEM2	10998	35172073	35216240	+	PROCR	MMP24OS	5	TTCAGCACCGCGGACAGGGGC,chr20,+,33,0.95263	TTCAGCACCGCGGACAGGGGC	chr20	+	33	0.95263	515	chr20:35227194-35227214	GGCACCGGGGACGGGCCTGGGCCGGGCCGCACCTACTGCCGAGGTCGCGGAGGCGGCGCGCCGGGGGTCCGCGCCTTGGGTCCGGGCTGGCGCGGCCCAGGGCGGGGGCTGGGGAGGGCCTCGCCGAGGGCCGCCGAGGCCGGGAGCTGCTTCAGCACCGCGGACAGGGGCAGCGGGCGGGGGCCGAGCACGAGGGTCGGGTTTGTTGTGTTGGCAGTGGGGTGTGTGGCCTGCATGACTATGTGCGAGGGAAACCGTACAACGCCTCGGAGTAAATAGTAAGCGCAGCCAGTCTGTTGTGGGTTGGGAGAAGAAACCGAG	chr20:35227044-35227364
20	35227080	35227467	35227238	388	35226238	35228238	ENCFF779CWH.2	79874	35115357	35147364	-	EDEM2	10998	35172073	35216240	+	PROCR	MMP24OS	5	GGCAGAACTAGGGCCAGCGGG,chr20,+,-256,0.78808	GGCAGAACTAGGGCCAGCGGG	chr20	+	-256	0.78808	804	chr20:35227483-35227503	CAGTCTGTTGTGGGTTGGGAGAAGAAACCGAGGATGTTCAAGCTGGAGAAGGGGGAGGGGGAGGGCGGAGGAAGGACTCGATCACTGTCTTCGTAGCTGAAGGGCTGTCAGGTGGAGGTAGGATAGACTTGTTCTAGCTTGGCCCCACAGGGCAGAACTAGGGCCAGCGGGAGTGGGGGTTGCAAGAAGACAAATTTGGGCTCGATATAGGAAGAAGTTTGTAACAATTGGAGCTGCTCAACCAGCTTAGGAGGCGGCGAGCTGCTCATCACTGGCATGTGCAAGTAAAAGCTCTCGGAGGGGATTGGATGGAGGCATGCA	chr20:35227333-35227653
20	35227080	35227467	35227238	388	35226238	35228238	ENCFF779CWH.2	79874	35115357	35147364	-	EDEM2	10998	35172073	35216240	+	PROCR	MMP24OS	5	GGCGGCACCGGGGACGGGCCT,chr20,+,186,0.75445	GGCGGCACCGGGGACGGGCCT	chr20	+	186	0.75445	362	chr20:35227041-35227061	GGCGGCGGCGGCGGCGGCGGGGGCAGGGAACCGGGCAGCGGTGGCGGTGGCGGTGGCGCGGGCGGACGAGGCGGAGGCGCCCTTCGCCGGGCAGGTGGGGCTGGCGCGCGGGGCCGGGGCGCGGGCTCGGGGCATCCGGGCAGGGCGGGGGGCGGCACCGGGGACGGGCCTGGGCCGGGCCGCACCTACTGCCGAGGTCGCGGAGGCGGCGCGCCGGGGGTCCGCGCCTTGGGTCCGGGCTGGCGCGGCCCAGGGCGGGGGCTGGGGAGGGCCTCGCCGAGGGCCGCCGAGGCCGGGAGCTGCTTCAGCACCGCGGACAGG	chr20:35226891-35227211
20	35227080	35227467	35227238	388	35226238	35228238	ENCFF779CWH.2	79874	35115357	35147364	-	EDEM2	10998	35172073	35216240	+	PROCR	MMP24OS	5	TCCGGAACCCTGGGGAGAGGG,chr20,-,877,0.74981	TCCGGAACCCTGGGGAGAGGG	chr20	-	877	0.74981	-329	chr20:35226350-35226370		chr20:35226200-35226520
20	35227080	35227467	35227238	388	35226238	35228238	ENCFF779CWH.2	79874	35115357	35147364	-	EDEM2	10998	35172073	35216240	+	PROCR	MMP24OS	5	GGCAGCACCCGGGCGGGACCT,chr20,-,629,0.72704	GGCAGCACCCGGGCGGGACCT	chr20	-	629	0.72704	-81	chr20:35226598-35226618	CGCGGCGCGGCCGCCCCGGCTCCTCGGCATCCCGGCGGCGGGGCCCGCGCCCGGCCCGCCTGCCTTCGCCGCCGCCGCCGCCGCCTCGGCCGCCAGCGCGCCCCCGCCTCCGCGCGCCCCGCCCCGGTGGGGGGCGGCCGGGGGCGCGGGGGCAGCACCCGGGCGGGACCTGCGAGGGCAGTGGCTCCCCGACCAGCCCTGGGGCAGGGGCCGCGGAGCGGCGCTGGGGAGGGGGTTGCAGAGGCTAAAAGAACAGTTCTAGAGGCAGGGTCCGAAGGGGTGGAACTGGAGGTCGGGGTCTGGGGGTAGCCCTGAGCAGGA	chr20:35226448-35226768
20	35227011	35227580	35227265	570	35226265	35228265	ENCFF706DRE.2	79901	35115357	35147364	-	EDEM2	11025	35172073	35216240	+	PROCR	MMP24OS	5	TTCAGCACCGCGGACAGGGGC,chr20,+,60,0.95263	TTCAGCACCGCGGACAGGGGC	chr20	+	60	0.95263	515	chr20:35227194-35227214	GGCACCGGGGACGGGCCTGGGCCGGGCCGCACCTACTGCCGAGGTCGCGGAGGCGGCGCGCCGGGGGTCCGCGCCTTGGGTCCGGGCTGGCGCGGCCCAGGGCGGGGGCTGGGGAGGGCCTCGCCGAGGGCCGCCGAGGCCGGGAGCTGCTTCAGCACCGCGGACAGGGGCAGCGGGCGGGGGCCGAGCACGAGGGTCGGGTTTGTTGTGTTGGCAGTGGGGTGTGTGGCCTGCATGACTATGTGCGAGGGAAACCGTACAACGCCTCGGAGTAAATAGTAAGCGCAGCCAGTCTGTTGTGGGTTGGGAGAAGAAACCGAG	chr20:35227044-35227364
20	35227011	35227580	35227265	570	35226265	35228265	ENCFF706DRE.2	79901	35115357	35147364	-	EDEM2	11025	35172073	35216240	+	PROCR	MMP24OS	5	GGCAGAACTAGGGCCAGCGGG,chr20,+,-229,0.78808	GGCAGAACTAGGGCCAGCGGG	chr20	+	-229	0.78808	804	chr20:35227483-35227503	CAGTCTGTTGTGGGTTGGGAGAAGAAACCGAGGATGTTCAAGCTGGAGAAGGGGGAGGGGGAGGGCGGAGGAAGGACTCGATCACTGTCTTCGTAGCTGAAGGGCTGTCAGGTGGAGGTAGGATAGACTTGTTCTAGCTTGGCCCCACAGGGCAGAACTAGGGCCAGCGGGAGTGGGGGTTGCAAGAAGACAAATTTGGGCTCGATATAGGAAGAAGTTTGTAACAATTGGAGCTGCTCAACCAGCTTAGGAGGCGGCGAGCTGCTCATCACTGGCATGTGCAAGTAAAAGCTCTCGGAGGGGATTGGATGGAGGCATGCA	chr20:35227333-35227653
20	35227011	35227580	35227265	570	35226265	35228265	ENCFF706DRE.2	79901	35115357	35147364	-	EDEM2	11025	35172073	35216240	+	PROCR	MMP24OS	5	GGCGGCACCGGGGACGGGCCT,chr20,+,213,0.75445	GGCGGCACCGGGGACGGGCCT	chr20	+	213	0.75445	362	chr20:35227041-35227061	GGCGGCGGCGGCGGCGGCGGGGGCAGGGAACCGGGCAGCGGTGGCGGTGGCGGTGGCGCGGGCGGACGAGGCGGAGGCGCCCTTCGCCGGGCAGGTGGGGCTGGCGCGCGGGGCCGGGGCGCGGGCTCGGGGCATCCGGGCAGGGCGGGGGGCGGCACCGGGGACGGGCCTGGGCCGGGCCGCACCTACTGCCGAGGTCGCGGAGGCGGCGCGCCGGGGGTCCGCGCCTTGGGTCCGGGCTGGCGCGGCCCAGGGCGGGGGCTGGGGAGGGCCTCGCCGAGGGCCGCCGAGGCCGGGAGCTGCTTCAGCACCGCGGACAGG	chr20:35226891-35227211
20	35227011	35227580	35227265	570	35226265	35228265	ENCFF706DRE.2	79901	35115357	35147364	-	EDEM2	11025	35172073	35216240	+	PROCR	MMP24OS	5	TCCGGAACCCTGGGGAGAGGG,chr20,-,904,0.74981	TCCGGAACCCTGGGGAGAGGG	chr20	-	904	0.74981	-329	chr20:35226350-35226370		chr20:35226200-35226520
20	35227011	35227580	35227265	570	35226265	35228265	ENCFF706DRE.2	79901	35115357	35147364	-	EDEM2	11025	35172073	35216240	+	PROCR	MMP24OS	5	GGCAGCACCCGGGCGGGACCT,chr20,-,656,0.72704	GGCAGCACCCGGGCGGGACCT	chr20	-	656	0.72704	-81	chr20:35226598-35226618	CGCGGCGCGGCCGCCCCGGCTCCTCGGCATCCCGGCGGCGGGGCCCGCGCCCGGCCCGCCTGCCTTCGCCGCCGCCGCCGCCGCCTCGGCCGCCAGCGCGCCCCCGCCTCCGCGCGCCCCGCCCCGGTGGGGGGCGGCCGGGGGCGCGGGGGCAGCACCCGGGCGGGACCTGCGAGGGCAGTGGCTCCCCGACCAGCCCTGGGGCAGGGGCCGCGGAGCGGCGCTGGGGAGGGGGTTGCAGAGGCTAAAAGAACAGTTCTAGAGGCAGGGTCCGAAGGGGTGGAACTGGAGGTCGGGGTCTGGGGGTAGCCCTGAGCAGGA	chr20:35226448-35226768
20	35227080	35227467	35227438	388	35226438	35228438	ENCFF779CWH.1	80074	35115357	35147364	-	EDEM2	11198	35172073	35216240	+	PROCR	MMP24OS	4	TTCAGCACCGCGGACAGGGGC,chr20,+,233,0.95263	TTCAGCACCGCGGACAGGGGC	chr20	+	233	0.95263	515	chr20:35227194-35227214	GGCACCGGGGACGGGCCTGGGCCGGGCCGCACCTACTGCCGAGGTCGCGGAGGCGGCGCGCCGGGGGTCCGCGCCTTGGGTCCGGGCTGGCGCGGCCCAGGGCGGGGGCTGGGGAGGGCCTCGCCGAGGGCCGCCGAGGCCGGGAGCTGCTTCAGCACCGCGGACAGGGGCAGCGGGCGGGGGCCGAGCACGAGGGTCGGGTTTGTTGTGTTGGCAGTGGGGTGTGTGGCCTGCATGACTATGTGCGAGGGAAACCGTACAACGCCTCGGAGTAAATAGTAAGCGCAGCCAGTCTGTTGTGGGTTGGGAGAAGAAACCGAG	chr20:35227044-35227364
20	35227080	35227467	35227438	388	35226438	35228438	ENCFF779CWH.1	80074	35115357	35147364	-	EDEM2	11198	35172073	35216240	+	PROCR	MMP24OS	4	GGCAGAACTAGGGCCAGCGGG,chr20,+,-56,0.78808	GGCAGAACTAGGGCCAGCGGG	chr20	+	-56	0.78808	804	chr20:35227483-35227503	CAGTCTGTTGTGGGTTGGGAGAAGAAACCGAGGATGTTCAAGCTGGAGAAGGGGGAGGGGGAGGGCGGAGGAAGGACTCGATCACTGTCTTCGTAGCTGAAGGGCTGTCAGGTGGAGGTAGGATAGACTTGTTCTAGCTTGGCCCCACAGGGCAGAACTAGGGCCAGCGGGAGTGGGGGTTGCAAGAAGACAAATTTGGGCTCGATATAGGAAGAAGTTTGTAACAATTGGAGCTGCTCAACCAGCTTAGGAGGCGGCGAGCTGCTCATCACTGGCATGTGCAAGTAAAAGCTCTCGGAGGGGATTGGATGGAGGCATGCA	chr20:35227333-35227653
20	35227080	35227467	35227438	388	35226438	35228438	ENCFF779CWH.1	80074	35115357	35147364	-	EDEM2	11198	35172073	35216240	+	PROCR	MMP24OS	4	GGCGGCACCGGGGACGGGCCT,chr20,+,386,0.75445	GGCGGCACCGGGGACGGGCCT	chr20	+	386	0.75445	362	chr20:35227041-35227061	GGCGGCGGCGGCGGCGGCGGGGGCAGGGAACCGGGCAGCGGTGGCGGTGGCGGTGGCGCGGGCGGACGAGGCGGAGGCGCCCTTCGCCGGGCAGGTGGGGCTGGCGCGCGGGGCCGGGGCGCGGGCTCGGGGCATCCGGGCAGGGCGGGGGGCGGCACCGGGGACGGGCCTGGGCCGGGCCGCACCTACTGCCGAGGTCGCGGAGGCGGCGCGCCGGGGGTCCGCGCCTTGGGTCCGGGCTGGCGCGGCCCAGGGCGGGGGCTGGGGAGGGCCTCGCCGAGGGCCGCCGAGGCCGGGAGCTGCTTCAGCACCGCGGACAGG	chr20:35226891-35227211
20	35227080	35227467	35227438	388	35226438	35228438	ENCFF779CWH.1	80074	35115357	35147364	-	EDEM2	11198	35172073	35216240	+	PROCR	MMP24OS	4	GGCAGCACCCGGGCGGGACCT,chr20,-,829,0.72704	GGCAGCACCCGGGCGGGACCT	chr20	-	829	0.72704	-81	chr20:35226598-35226618	CGCGGCGCGGCCGCCCCGGCTCCTCGGCATCCCGGCGGCGGGGCCCGCGCCCGGCCCGCCTGCCTTCGCCGCCGCCGCCGCCGCCTCGGCCGCCAGCGCGCCCCCGCCTCCGCGCGCCCCGCCCCGGTGGGGGGCGGCCGGGGGCGCGGGGGCAGCACCCGGGCGGGACCTGCGAGGGCAGTGGCTCCCCGACCAGCCCTGGGGCAGGGGCCGCGGAGCGGCGCTGGGGAGGGGGTTGCAGAGGCTAAAAGAACAGTTCTAGAGGCAGGGTCCGAAGGGGTGGAACTGGAGGTCGGGGTCTGGGGGTAGCCCTGAGCAGGA	chr20:35226448-35226768
20	35227011	35227580	35227486	570	35226486	35228486	ENCFF706DRE.1	80122	35115357	35147364	-	EDEM2	11246	35172073	35216240	+	PROCR	MMP24OS	4	TTCAGCACCGCGGACAGGGGC,chr20,+,281,0.95263	TTCAGCACCGCGGACAGGGGC	chr20	+	281	0.95263	515	chr20:35227194-35227214	GGCACCGGGGACGGGCCTGGGCCGGGCCGCACCTACTGCCGAGGTCGCGGAGGCGGCGCGCCGGGGGTCCGCGCCTTGGGTCCGGGCTGGCGCGGCCCAGGGCGGGGGCTGGGGAGGGCCTCGCCGAGGGCCGCCGAGGCCGGGAGCTGCTTCAGCACCGCGGACAGGGGCAGCGGGCGGGGGCCGAGCACGAGGGTCGGGTTTGTTGTGTTGGCAGTGGGGTGTGTGGCCTGCATGACTATGTGCGAGGGAAACCGTACAACGCCTCGGAGTAAATAGTAAGCGCAGCCAGTCTGTTGTGGGTTGGGAGAAGAAACCGAG	chr20:35227044-35227364
20	35227011	35227580	35227486	570	35226486	35228486	ENCFF706DRE.1	80122	35115357	35147364	-	EDEM2	11246	35172073	35216240	+	PROCR	MMP24OS	4	GGCAGAACTAGGGCCAGCGGG,chr20,+,-8,0.78808	GGCAGAACTAGGGCCAGCGGG	chr20	+	-8	0.78808	804	chr20:35227483-35227503	CAGTCTGTTGTGGGTTGGGAGAAGAAACCGAGGATGTTCAAGCTGGAGAAGGGGGAGGGGGAGGGCGGAGGAAGGACTCGATCACTGTCTTCGTAGCTGAAGGGCTGTCAGGTGGAGGTAGGATAGACTTGTTCTAGCTTGGCCCCACAGGGCAGAACTAGGGCCAGCGGGAGTGGGGGTTGCAAGAAGACAAATTTGGGCTCGATATAGGAAGAAGTTTGTAACAATTGGAGCTGCTCAACCAGCTTAGGAGGCGGCGAGCTGCTCATCACTGGCATGTGCAAGTAAAAGCTCTCGGAGGGGATTGGATGGAGGCATGCA	chr20:35227333-35227653
20	35227011	35227580	35227486	570	35226486	35228486	ENCFF706DRE.1	80122	35115357	35147364	-	EDEM2	11246	35172073	35216240	+	PROCR	MMP24OS	4	GGCGGCACCGGGGACGGGCCT,chr20,+,434,0.75445	GGCGGCACCGGGGACGGGCCT	chr20	+	434	0.75445	362	chr20:35227041-35227061	GGCGGCGGCGGCGGCGGCGGGGGCAGGGAACCGGGCAGCGGTGGCGGTGGCGGTGGCGCGGGCGGACGAGGCGGAGGCGCCCTTCGCCGGGCAGGTGGGGCTGGCGCGCGGGGCCGGGGCGCGGGCTCGGGGCATCCGGGCAGGGCGGGGGGCGGCACCGGGGACGGGCCTGGGCCGGGCCGCACCTACTGCCGAGGTCGCGGAGGCGGCGCGCCGGGGGTCCGCGCCTTGGGTCCGGGCTGGCGCGGCCCAGGGCGGGGGCTGGGGAGGGCCTCGCCGAGGGCCGCCGAGGCCGGGAGCTGCTTCAGCACCGCGGACAGG	chr20:35226891-35227211
20	35227011	35227580	35227486	570	35226486	35228486	ENCFF706DRE.1	80122	35115357	35147364	-	EDEM2	11246	35172073	35216240	+	PROCR	MMP24OS	4	GGCAGCACCCGGGCGGGACCT,chr20,-,877,0.72704	GGCAGCACCCGGGCGGGACCT	chr20	-	877	0.72704	-81	chr20:35226598-35226618		chr20:35226448-35226768
20	35232510	35232766	35232638	257	35231638	35233638	ENCFF540FXB.1	85274	35115357	35147364	-	EDEM2	16398	35172073	35216240	+	PROCR	MMP24OS	2	CTCAGTACCTAGCACAGTGCA,chr20,+,295,0.8317	CTCAGTACCTAGCACAGTGCA	chr20	+	295	0.8317	5653	chr20:35232332-35232352	TCCTACTCTGGTCCTTGAAAGAGGTATTTTTAGAACTAATAAAAGTAAATTATAATTGTACCCAAAAGACTAATCTTAGGAAATGCCTAGCCCTATAGTATGGTATTGTTTGAACTCAAAACAGGAAGAACAAACCACAGCCAATATCTCCTCAGTACCTAGCACAGTGCATGATACATTCTGGACATGTGATAAATATTTTAAAATTAATTTTGTTATCTAATCCCCATCAACTTCTTTGAATAGTGCTTGGCACACAAAAGTCGCTACCTTTTGTGAAGAATAAATGAATGCATGCTAGAGGTATAACAAGGTGCCGGG	chr20:35232182-35232502
20	35232510	35232766	35232638	257	35231638	35233638	ENCFF540FXB.1	85274	35115357	35147364	-	EDEM2	16398	35172073	35216240	+	PROCR	MMP24OS	2	TGCACCACCAGGCTCAGCTAA,chr20,-,724,0.71727	TGCACCACCAGGCTCAGCTAA	chr20	-	724	0.71727	5224	chr20:35231903-35231923	TGTTATTTGCTTTAATTTCTTTTTTTCTTCTGAGACGGAGATTCACTCTTTTGCCCAGGCTGGAGTGAAGTGGCACAGTCTTGGCTCACTACAACCTCTGCCCCCGGGGTTCAAGCAATTCTCCTGCCTCAGCAGCTGGGATTACAGGCATGCACCACCAGGCTCAGCTAATTTTTGTATTTTTAGTAGAGATGGGGTTTCACCATGTTGGCCAGGCTAGTCTCAAACTCCTGACCTCAGGTGATCCACCTGCCTCGGCCTCCCAAAGTGCTGGGATTACAGGTGTGAGCCACCATGCCTGGCCTGCTTTAATGTTTATGA	chr20:35231753-35232073
20	35257544	35258034	35257789	491	35256789	35258789	ENCFF107EWI.2	110425	35115357	35147364	-	EDEM2	10096	35267885	35280043	-	AL121753.1	MMP24OS	3	CAAAGTACCTTGGAAATGTCT,chr20,+,-569,0.73311	CAAAGTACCTTGGAAATGTCT	chr20	+	-569	0.73311	31668	chr20:35258347-35258367	AGGCATTCTAACATTTCACCTTTAAATACTTTAGTATATACCTCTAACAGATAAAGGCTAATTTTTAACATAAGCACACAATCATTATCAAGCCCAACAAAATTAACAATAATTTTTTAAAATCTAATACCCAGTTCGAGTTCACTTTCCCAAAGTACCTTGGAAATGTCTTTTACAGTTGTTTGCTTGAATCAGGATCCAAACAAGATCCACACACACATGGCTGACATGTCTCTTAAAGCCCTTTTTATTTAAAACACCCCCGTCCTACACACACGTTTCCCTCCATATATTTGTTGAAGAAACTGGGTCAGGTGTCCC	chr20:35258197-35258517
20	35257544	35258034	35257789	491	35256789	35258789	ENCFF107EWI.2	110425	35115357	35147364	-	EDEM2	10096	35267885	35280043	-	AL121753.1	MMP24OS	3	CTCAGGACCACAGCAATCGAC,chr20,+,-84,0.71178	CTCAGGACCACAGCAATCGAC	chr20	+	-84	0.71178	31183	chr20:35257862-35257882	ATCCCAGCACCTCTCCCATCTGTCCAACCCTAACCTTCATGAAAGACTGCCAATTCTGATAGAAATTCCAAGATTGCTAATGTTTTCTTTGGATAAGAATCAGGACTTTGCTCTGCTCTGGAAAACCAAGCAGGAACTGTCCAGATGCAGCTCAGGACCACAGCAATCGACTCCTGAACTGGAATGCAGTGAAGGCAGGTTTTGGGTGAGAGGCAAGGAACCAAAATTTATTGAGCATCCATATATTATCTCGTTTAATTTCCACATAGACTCAGCAAAGGGGTGGAGTTTCCTGGGAACTTTTTGAACTTATTAGCTTAC	chr20:35257712-35258032
20	35257544	35258034	35257789	491	35256789	35258789	ENCFF107EWI.2	110425	35115357	35147364	-	EDEM2	10096	35267885	35280043	-	AL121753.1	MMP24OS	3	TGAAGAAACTGGGTCAGGTGT,chr20,+,-716,0.70025	TGAAGAAACTGGGTCAGGTGT	chr20	+	-716	0.70025	31815	chr20:35258494-35258514	TCCCAAAGTACCTTGGAAATGTCTTTTACAGTTGTTTGCTTGAATCAGGATCCAAACAAGATCCACACACACATGGCTGACATGTCTCTTAAAGCCCTTTTTATTTAAAACACCCCCGTCCTACACACACGTTTCCCTCCATATATTTGTTGAAGAAACTGGGTCAGGTGTCCCGAGTATAATCATTTGGCGTGACTAGAATCAAGTTTACTTTTAATACGTCTCTCTTGCCCATAATTCCTGAATGTTGTTCATTAGATTTACAGGCTGACTAGATTCAAGTTCAATTTTTTTGGCAAGAATACTTCCTAGGTGGTGCTG	chr20:35258344-35258664
20	35257717	35257961	35257839	245	35256839	35258839	ENCFF208NUB.1	110475	35115357	35147364	-	EDEM2	10046	35267885	35280043	-	AL121753.1	MMP24OS	3	CAAAGTACCTTGGAAATGTCT,chr20,+,-519,0.73311	CAAAGTACCTTGGAAATGTCT	chr20	+	-519	0.73311	31668	chr20:35258347-35258367	AGGCATTCTAACATTTCACCTTTAAATACTTTAGTATATACCTCTAACAGATAAAGGCTAATTTTTAACATAAGCACACAATCATTATCAAGCCCAACAAAATTAACAATAATTTTTTAAAATCTAATACCCAGTTCGAGTTCACTTTCCCAAAGTACCTTGGAAATGTCTTTTACAGTTGTTTGCTTGAATCAGGATCCAAACAAGATCCACACACACATGGCTGACATGTCTCTTAAAGCCCTTTTTATTTAAAACACCCCCGTCCTACACACACGTTTCCCTCCATATATTTGTTGAAGAAACTGGGTCAGGTGTCCC	chr20:35258197-35258517
20	35257717	35257961	35257839	245	35256839	35258839	ENCFF208NUB.1	110475	35115357	35147364	-	EDEM2	10046	35267885	35280043	-	AL121753.1	MMP24OS	3	CTCAGGACCACAGCAATCGAC,chr20,+,-34,0.71178	CTCAGGACCACAGCAATCGAC	chr20	+	-34	0.71178	31183	chr20:35257862-35257882	ATCCCAGCACCTCTCCCATCTGTCCAACCCTAACCTTCATGAAAGACTGCCAATTCTGATAGAAATTCCAAGATTGCTAATGTTTTCTTTGGATAAGAATCAGGACTTTGCTCTGCTCTGGAAAACCAAGCAGGAACTGTCCAGATGCAGCTCAGGACCACAGCAATCGACTCCTGAACTGGAATGCAGTGAAGGCAGGTTTTGGGTGAGAGGCAAGGAACCAAAATTTATTGAGCATCCATATATTATCTCGTTTAATTTCCACATAGACTCAGCAAAGGGGTGGAGTTTCCTGGGAACTTTTTGAACTTATTAGCTTAC	chr20:35257712-35258032
20	35257717	35257961	35257839	245	35256839	35258839	ENCFF208NUB.1	110475	35115357	35147364	-	EDEM2	10046	35267885	35280043	-	AL121753.1	MMP24OS	3	TGAAGAAACTGGGTCAGGTGT,chr20,+,-666,0.70025	TGAAGAAACTGGGTCAGGTGT	chr20	+	-666	0.70025	31815	chr20:35258494-35258514	TCCCAAAGTACCTTGGAAATGTCTTTTACAGTTGTTTGCTTGAATCAGGATCCAAACAAGATCCACACACACATGGCTGACATGTCTCTTAAAGCCCTTTTTATTTAAAACACCCCCGTCCTACACACACGTTTCCCTCCATATATTTGTTGAAGAAACTGGGTCAGGTGTCCCGAGTATAATCATTTGGCGTGACTAGAATCAAGTTTACTTTTAATACGTCTCTCTTGCCCATAATTCCTGAATGTTGTTCATTAGATTTACAGGCTGACTAGATTCAAGTTCAATTTTTTTGGCAAGAATACTTCCTAGGTGGTGCTG	chr20:35258344-35258664
20	35257703	35257979	35257841	277	35256841	35258841	ENCFF668YET.2	110477	35115357	35147364	-	EDEM2	10044	35267885	35280043	-	AL121753.1	MMP24OS	3	CAAAGTACCTTGGAAATGTCT,chr20,+,-517,0.73311	CAAAGTACCTTGGAAATGTCT	chr20	+	-517	0.73311	31668	chr20:35258347-35258367	AGGCATTCTAACATTTCACCTTTAAATACTTTAGTATATACCTCTAACAGATAAAGGCTAATTTTTAACATAAGCACACAATCATTATCAAGCCCAACAAAATTAACAATAATTTTTTAAAATCTAATACCCAGTTCGAGTTCACTTTCCCAAAGTACCTTGGAAATGTCTTTTACAGTTGTTTGCTTGAATCAGGATCCAAACAAGATCCACACACACATGGCTGACATGTCTCTTAAAGCCCTTTTTATTTAAAACACCCCCGTCCTACACACACGTTTCCCTCCATATATTTGTTGAAGAAACTGGGTCAGGTGTCCC	chr20:35258197-35258517
20	35257703	35257979	35257841	277	35256841	35258841	ENCFF668YET.2	110477	35115357	35147364	-	EDEM2	10044	35267885	35280043	-	AL121753.1	MMP24OS	3	CTCAGGACCACAGCAATCGAC,chr20,+,-32,0.71178	CTCAGGACCACAGCAATCGAC	chr20	+	-32	0.71178	31183	chr20:35257862-35257882	ATCCCAGCACCTCTCCCATCTGTCCAACCCTAACCTTCATGAAAGACTGCCAATTCTGATAGAAATTCCAAGATTGCTAATGTTTTCTTTGGATAAGAATCAGGACTTTGCTCTGCTCTGGAAAACCAAGCAGGAACTGTCCAGATGCAGCTCAGGACCACAGCAATCGACTCCTGAACTGGAATGCAGTGAAGGCAGGTTTTGGGTGAGAGGCAAGGAACCAAAATTTATTGAGCATCCATATATTATCTCGTTTAATTTCCACATAGACTCAGCAAAGGGGTGGAGTTTCCTGGGAACTTTTTGAACTTATTAGCTTAC	chr20:35257712-35258032
20	35257703	35257979	35257841	277	35256841	35258841	ENCFF668YET.2	110477	35115357	35147364	-	EDEM2	10044	35267885	35280043	-	AL121753.1	MMP24OS	3	TGAAGAAACTGGGTCAGGTGT,chr20,+,-664,0.70025	TGAAGAAACTGGGTCAGGTGT	chr20	+	-664	0.70025	31815	chr20:35258494-35258514	TCCCAAAGTACCTTGGAAATGTCTTTTACAGTTGTTTGCTTGAATCAGGATCCAAACAAGATCCACACACACATGGCTGACATGTCTCTTAAAGCCCTTTTTATTTAAAACACCCCCGTCCTACACACACGTTTCCCTCCATATATTTGTTGAAGAAACTGGGTCAGGTGTCCCGAGTATAATCATTTGGCGTGACTAGAATCAAGTTTACTTTTAATACGTCTCTCTTGCCCATAATTCCTGAATGTTGTTCATTAGATTTACAGGCTGACTAGATTCAAGTTCAATTTTTTTGGCAAGAATACTTCCTAGGTGGTGCTG	chr20:35258344-35258664
20	35257723	35257979	35257851	257	35256851	35258851	ENCFF540FXB.2	110487	35115357	35147364	-	EDEM2	10034	35267885	35280043	-	AL121753.1	MMP24OS	3	CAAAGTACCTTGGAAATGTCT,chr20,+,-507,0.73311	CAAAGTACCTTGGAAATGTCT	chr20	+	-507	0.73311	31668	chr20:35258347-35258367	AGGCATTCTAACATTTCACCTTTAAATACTTTAGTATATACCTCTAACAGATAAAGGCTAATTTTTAACATAAGCACACAATCATTATCAAGCCCAACAAAATTAACAATAATTTTTTAAAATCTAATACCCAGTTCGAGTTCACTTTCCCAAAGTACCTTGGAAATGTCTTTTACAGTTGTTTGCTTGAATCAGGATCCAAACAAGATCCACACACACATGGCTGACATGTCTCTTAAAGCCCTTTTTATTTAAAACACCCCCGTCCTACACACACGTTTCCCTCCATATATTTGTTGAAGAAACTGGGTCAGGTGTCCC	chr20:35258197-35258517
20	35257723	35257979	35257851	257	35256851	35258851	ENCFF540FXB.2	110487	35115357	35147364	-	EDEM2	10034	35267885	35280043	-	AL121753.1	MMP24OS	3	CTCAGGACCACAGCAATCGAC,chr20,+,-22,0.71178	CTCAGGACCACAGCAATCGAC	chr20	+	-22	0.71178	31183	chr20:35257862-35257882	ATCCCAGCACCTCTCCCATCTGTCCAACCCTAACCTTCATGAAAGACTGCCAATTCTGATAGAAATTCCAAGATTGCTAATGTTTTCTTTGGATAAGAATCAGGACTTTGCTCTGCTCTGGAAAACCAAGCAGGAACTGTCCAGATGCAGCTCAGGACCACAGCAATCGACTCCTGAACTGGAATGCAGTGAAGGCAGGTTTTGGGTGAGAGGCAAGGAACCAAAATTTATTGAGCATCCATATATTATCTCGTTTAATTTCCACATAGACTCAGCAAAGGGGTGGAGTTTCCTGGGAACTTTTTGAACTTATTAGCTTAC	chr20:35257712-35258032
20	35257723	35257979	35257851	257	35256851	35258851	ENCFF540FXB.2	110487	35115357	35147364	-	EDEM2	10034	35267885	35280043	-	AL121753.1	MMP24OS	3	TGAAGAAACTGGGTCAGGTGT,chr20,+,-654,0.70025	TGAAGAAACTGGGTCAGGTGT	chr20	+	-654	0.70025	31815	chr20:35258494-35258514	TCCCAAAGTACCTTGGAAATGTCTTTTACAGTTGTTTGCTTGAATCAGGATCCAAACAAGATCCACACACACATGGCTGACATGTCTCTTAAAGCCCTTTTTATTTAAAACACCCCCGTCCTACACACACGTTTCCCTCCATATATTTGTTGAAGAAACTGGGTCAGGTGTCCCGAGTATAATCATTTGGCGTGACTAGAATCAAGTTTACTTTTAATACGTCTCTCTTGCCCATAATTCCTGAATGTTGTTCATTAGATTTACAGGCTGACTAGATTCAAGTTCAATTTTTTTGGCAAGAATACTTCCTAGGTGGTGCTG	chr20:35258344-35258664
20	35257708	35257998	35257853	291	35256853	35258853	ENCFF669XCW.3	110489	35115357	35147364	-	EDEM2	10032	35267885	35280043	-	AL121753.1	MMP24OS	3	CAAAGTACCTTGGAAATGTCT,chr20,+,-505,0.73311	CAAAGTACCTTGGAAATGTCT	chr20	+	-505	0.73311	31668	chr20:35258347-35258367	AGGCATTCTAACATTTCACCTTTAAATACTTTAGTATATACCTCTAACAGATAAAGGCTAATTTTTAACATAAGCACACAATCATTATCAAGCCCAACAAAATTAACAATAATTTTTTAAAATCTAATACCCAGTTCGAGTTCACTTTCCCAAAGTACCTTGGAAATGTCTTTTACAGTTGTTTGCTTGAATCAGGATCCAAACAAGATCCACACACACATGGCTGACATGTCTCTTAAAGCCCTTTTTATTTAAAACACCCCCGTCCTACACACACGTTTCCCTCCATATATTTGTTGAAGAAACTGGGTCAGGTGTCCC	chr20:35258197-35258517
20	35257708	35257998	35257853	291	35256853	35258853	ENCFF669XCW.3	110489	35115357	35147364	-	EDEM2	10032	35267885	35280043	-	AL121753.1	MMP24OS	3	CTCAGGACCACAGCAATCGAC,chr20,+,-20,0.71178	CTCAGGACCACAGCAATCGAC	chr20	+	-20	0.71178	31183	chr20:35257862-35257882	ATCCCAGCACCTCTCCCATCTGTCCAACCCTAACCTTCATGAAAGACTGCCAATTCTGATAGAAATTCCAAGATTGCTAATGTTTTCTTTGGATAAGAATCAGGACTTTGCTCTGCTCTGGAAAACCAAGCAGGAACTGTCCAGATGCAGCTCAGGACCACAGCAATCGACTCCTGAACTGGAATGCAGTGAAGGCAGGTTTTGGGTGAGAGGCAAGGAACCAAAATTTATTGAGCATCCATATATTATCTCGTTTAATTTCCACATAGACTCAGCAAAGGGGTGGAGTTTCCTGGGAACTTTTTGAACTTATTAGCTTAC	chr20:35257712-35258032
20	35257708	35257998	35257853	291	35256853	35258853	ENCFF669XCW.3	110489	35115357	35147364	-	EDEM2	10032	35267885	35280043	-	AL121753.1	MMP24OS	3	TGAAGAAACTGGGTCAGGTGT,chr20,+,-652,0.70025	TGAAGAAACTGGGTCAGGTGT	chr20	+	-652	0.70025	31815	chr20:35258494-35258514	TCCCAAAGTACCTTGGAAATGTCTTTTACAGTTGTTTGCTTGAATCAGGATCCAAACAAGATCCACACACACATGGCTGACATGTCTCTTAAAGCCCTTTTTATTTAAAACACCCCCGTCCTACACACACGTTTCCCTCCATATATTTGTTGAAGAAACTGGGTCAGGTGTCCCGAGTATAATCATTTGGCGTGACTAGAATCAAGTTTACTTTTAATACGTCTCTCTTGCCCATAATTCCTGAATGTTGTTCATTAGATTTACAGGCTGACTAGATTCAAGTTCAATTTTTTTGGCAAGAATACTTCCTAGGTGGTGCTG	chr20:35258344-35258664
20	35257799	35257913	35257858	115	35256858	35258858	ENCFF896RCP.4	110494	35115357	35147364	-	EDEM2	10027	35267885	35280043	-	AL121753.1	MMP24OS	3	CAAAGTACCTTGGAAATGTCT,chr20,+,-500,0.73311	CAAAGTACCTTGGAAATGTCT	chr20	+	-500	0.73311	31668	chr20:35258347-35258367	AGGCATTCTAACATTTCACCTTTAAATACTTTAGTATATACCTCTAACAGATAAAGGCTAATTTTTAACATAAGCACACAATCATTATCAAGCCCAACAAAATTAACAATAATTTTTTAAAATCTAATACCCAGTTCGAGTTCACTTTCCCAAAGTACCTTGGAAATGTCTTTTACAGTTGTTTGCTTGAATCAGGATCCAAACAAGATCCACACACACATGGCTGACATGTCTCTTAAAGCCCTTTTTATTTAAAACACCCCCGTCCTACACACACGTTTCCCTCCATATATTTGTTGAAGAAACTGGGTCAGGTGTCCC	chr20:35258197-35258517
20	35257799	35257913	35257858	115	35256858	35258858	ENCFF896RCP.4	110494	35115357	35147364	-	EDEM2	10027	35267885	35280043	-	AL121753.1	MMP24OS	3	CTCAGGACCACAGCAATCGAC,chr20,+,-15,0.71178	CTCAGGACCACAGCAATCGAC	chr20	+	-15	0.71178	31183	chr20:35257862-35257882	ATCCCAGCACCTCTCCCATCTGTCCAACCCTAACCTTCATGAAAGACTGCCAATTCTGATAGAAATTCCAAGATTGCTAATGTTTTCTTTGGATAAGAATCAGGACTTTGCTCTGCTCTGGAAAACCAAGCAGGAACTGTCCAGATGCAGCTCAGGACCACAGCAATCGACTCCTGAACTGGAATGCAGTGAAGGCAGGTTTTGGGTGAGAGGCAAGGAACCAAAATTTATTGAGCATCCATATATTATCTCGTTTAATTTCCACATAGACTCAGCAAAGGGGTGGAGTTTCCTGGGAACTTTTTGAACTTATTAGCTTAC	chr20:35257712-35258032
20	35257799	35257913	35257858	115	35256858	35258858	ENCFF896RCP.4	110494	35115357	35147364	-	EDEM2	10027	35267885	35280043	-	AL121753.1	MMP24OS	3	TGAAGAAACTGGGTCAGGTGT,chr20,+,-647,0.70025	TGAAGAAACTGGGTCAGGTGT	chr20	+	-647	0.70025	31815	chr20:35258494-35258514	TCCCAAAGTACCTTGGAAATGTCTTTTACAGTTGTTTGCTTGAATCAGGATCCAAACAAGATCCACACACACATGGCTGACATGTCTCTTAAAGCCCTTTTTATTTAAAACACCCCCGTCCTACACACACGTTTCCCTCCATATATTTGTTGAAGAAACTGGGTCAGGTGTCCCGAGTATAATCATTTGGCGTGACTAGAATCAAGTTTACTTTTAATACGTCTCTCTTGCCCATAATTCCTGAATGTTGTTCATTAGATTTACAGGCTGACTAGATTCAAGTTCAATTTTTTTGGCAAGAATACTTCCTAGGTGGTGCTG	chr20:35258344-35258664
20	35263214	35263453	35263343	240	35262343	35264343	ENCFF107EWI.1	115979	35115357	35147364	-	EDEM2	4542	35267885	35280043	-	AL121753.1	MMP24OS	1	AACAAGACCTGGGGCAGGGGG,chr20,-,207,0.75145	AACAAGACCTGGGGCAGGGGG	chr20	-	207	0.75145	36446	chr20:35263125-35263145	GAGATGAGGTCAGCCAGGCTGGAAAGCAGGGCGCTTAATGCCATACAAAGGAATTTGGATCAGCTTCTTGGCTAGTGGGGGGTTTAAGTAGGAGTGGGGGTGGTGATACAATTAAATCACTCTGGCTGCAGTTGAGGGAGGATTAGAGGGAACAAGACCTGGGGCAGGGGGATCTGTTTGGATGCTGGGGTCCAGGCGAGAGATTGTGGGGAAAAGCAAGAGAGATCAGATTGTTACTGTGTCTGTGCAGAAAGAAGTAGACATAGGAGACTCCATTTTGTTATGTACTAAGAAAAATTCTTCTGCCTTGAGATTCTGTTA	chr20:35262975-35263295
20	35264868	35264993	35264940	126	35263940	35265940	ENCFF290ESJ.3	117576	35115357	35147364	-	EDEM2	2945	35267885	35280043	-	AL121753.1	MMP24OS	0	---	---					38034	chr20:35264722-35264742		chr20:35264572-35264892
20	35269042	35269362	35269202	321	35268202	35270202	ENCFF896RCP.2	121838	35115357	35147364	-	EDEM2	9709	35278911	35284985	-	EIF6	MMP24OS	2	CCCAAGACCTTGGGCAGGGAA,chr20,-,-734,0.77053	CCCAAGACCTTGGGCAGGGAA	chr20	-	-734	0.77053	43246	chr20:35269925-35269945	TCACCCCACCAATCTCGGCACATACAGATTCTCAGTCTCACTTTCTGACTTGATTTGTCAGAGGTCAGTGTCTCCGTTAGACTAGAGGGGCCCTCTGAGGACATCTGCCTCCCACCCCGCCTCTTCCAGTTTAGATGGGAAAAAGGAGGTCCCAAGACCTTGGGCAGGGAACTGTCCCACAGCACAGTCTACATTACCTTTGAAGAAGACAAATCTCCCATCGGCCCTTTCATAGGCTGCGTCGATGCGGGCAGGCAGGCCCTTCCAGAACTGCTCGATCTGCATGGGGTAGCCCTCCTGCACTCGGTTATTGCGCAGACG	chr20:35269775-35270095
20	35269042	35269362	35269202	321	35268202	35270202	ENCFF896RCP.2	121838	35115357	35147364	-	EDEM2	9709	35278911	35284985	-	EIF6	MMP24OS	2	GCCAGCAGTGTGGCCAGCAGG,chr20,-,900,0.71765	GCCAGCAGTGTGGCCAGCAGG	chr20	-	900	0.71765	41612	chr20:35268291-35268311		chr20:35268141-35268461
20	35269249	35269569	35269409	321	35268409	35270409	ENCFF896RCP.1	122045	35115357	35147364	-	EDEM2	9502	35278911	35284985	-	EIF6	MMP24OS	1	CCCAAGACCTTGGGCAGGGAA,chr20,-,-527,0.77053	CCCAAGACCTTGGGCAGGGAA	chr20	-	-527	0.77053	43246	chr20:35269925-35269945	TCACCCCACCAATCTCGGCACATACAGATTCTCAGTCTCACTTTCTGACTTGATTTGTCAGAGGTCAGTGTCTCCGTTAGACTAGAGGGGCCCTCTGAGGACATCTGCCTCCCACCCCGCCTCTTCCAGTTTAGATGGGAAAAAGGAGGTCCCAAGACCTTGGGCAGGGAACTGTCCCACAGCACAGTCTACATTACCTTTGAAGAAGACAAATCTCCCATCGGCCCTTTCATAGGCTGCGTCGATGCGGGCAGGCAGGCCCTTCCAGAACTGCTCGATCTGCATGGGGTAGCCCTCCTGCACTCGGTTATTGCGCAGACG	chr20:35269775-35270095
20	35269371	35269498	35269442	128	35268442	35270442	ENCFF290ESJ.4	122078	35115357	35147364	-	EDEM2	9469	35278911	35284985	-	EIF6	MMP24OS	1	CCCAAGACCTTGGGCAGGGAA,chr20,-,-494,0.77053	CCCAAGACCTTGGGCAGGGAA	chr20	-	-494	0.77053	43246	chr20:35269925-35269945	TCACCCCACCAATCTCGGCACATACAGATTCTCAGTCTCACTTTCTGACTTGATTTGTCAGAGGTCAGTGTCTCCGTTAGACTAGAGGGGCCCTCTGAGGACATCTGCCTCCCACCCCGCCTCTTCCAGTTTAGATGGGAAAAAGGAGGTCCCAAGACCTTGGGCAGGGAACTGTCCCACAGCACAGTCTACATTACCTTTGAAGAAGACAAATCTCCCATCGGCCCTTTCATAGGCTGCGTCGATGCGGGCAGGCAGGCCCTTCCAGAACTGCTCGATCTGCATGGGGTAGCCCTCCTGCACTCGGTTATTGCGCAGACG	chr20:35269775-35270095
20	35270407	35270817	35270612	411	35269612	35271612	ENCFF290ESJ.1	123248	35115357	35147364	-	EDEM2	8299	35278911	35284985	-	EIF6	MMP24OS	3	CCCAAGACCTTGGGCAGGGAA,chr20,-,676,0.77053	CCCAAGACCTTGGGCAGGGAA	chr20	-	676	0.77053	43246	chr20:35269925-35269945	TCACCCCACCAATCTCGGCACATACAGATTCTCAGTCTCACTTTCTGACTTGATTTGTCAGAGGTCAGTGTCTCCGTTAGACTAGAGGGGCCCTCTGAGGACATCTGCCTCCCACCCCGCCTCTTCCAGTTTAGATGGGAAAAAGGAGGTCCCAAGACCTTGGGCAGGGAACTGTCCCACAGCACAGTCTACATTACCTTTGAAGAAGACAAATCTCCCATCGGCCCTTTCATAGGCTGCGTCGATGCGGGCAGGCAGGCCCTTCCAGAACTGCTCGATCTGCATGGGGTAGCCCTCCTGCACTCGGTTATTGCGCAGACG	chr20:35269775-35270095
20	35270407	35270817	35270612	411	35269612	35271612	ENCFF290ESJ.1	123248	35115357	35147364	-	EDEM2	8299	35278911	35284985	-	EIF6	MMP24OS	3	TGAAGGGCAGGGGACAGCTGC,chr20,+,-98,0.7311	TGAAGGGCAGGGGACAGCTGC	chr20	+	-98	0.7311	44020	chr20:35270699-35270719	GGCCAAGGCTGGAAATTCATGGAATGTTTCCGAGCAGCAGAGAGCCAGAGGGCAGGAGGTGACAGACATGGCAGGGGCAGGGCAGCCATTTCTGAGGTGGTTCTGGAGCGCGCCACTCATGAGGCCCAAATGAGGGAGGAGCCGTGCAGCTGAAGGGCAGGGGACAGCTGCCAGGAGAGTCAGAGGGCCTCAGAAGTGGCTGAATACTCGGCCAGGCGCAGTGGCTCACGCCCGAAATCCCAGCACTTTGGGAGGCCAAGGCTGGCAGATCACCTGAGGTCAGGAGTTTGAGACCAGCCTGACCAACATGGTGAAACCACG	chr20:35270549-35270869
20	35270407	35270817	35270612	411	35269612	35271612	ENCFF290ESJ.1	123248	35115357	35147364	-	EDEM2	8299	35278911	35284985	-	EIF6	MMP24OS	3	CTCAGGTCCAGTGGGAGAGCC,chr20,+,-639,0.70058	CTCAGGTCCAGTGGGAGAGCC	chr20	+	-639	0.70058	44561	chr20:35271240-35271260	ACAGTGAGGCTAGGACTCCCTGTTGGGGACCTGGGAGGCAGAAGGTGATGAGGAGGGAGCCCCTCTGTGGTGCAGATGAGGAGCTCTGGGGAGCCAGCCAATGCAGAGCTGCCGGTAGGCCGAGGGAGGTCAGGGTTTCTGGCTCTGCTGCTCAGGTCCAGTGGGAGAGCCTCAGAGTCGGGTGTCACTGGTAGCAGGTTTGGGGAGTGGTAGTGCATATGCAAAGTCATGTAAGTGGCTGAGATCACCAGAGAGGAGAGAGGAGCAAGTCACATGAACAAAAGAGGGTGGGACTCGGAGCCCAGGCAGCAGAGGCAAGTT	chr20:35271090-35271410
20	35271088	35271498	35271293	411	35270293	35272293	ENCFF290ESJ.2	123929	35115357	35147364	-	EDEM2	7618	35278911	35284985	-	EIF6	MMP24OS	2	TGAAGGGCAGGGGACAGCTGC,chr20,+,583,0.7311	TGAAGGGCAGGGGACAGCTGC	chr20	+	583	0.7311	44020	chr20:35270699-35270719	GGCCAAGGCTGGAAATTCATGGAATGTTTCCGAGCAGCAGAGAGCCAGAGGGCAGGAGGTGACAGACATGGCAGGGGCAGGGCAGCCATTTCTGAGGTGGTTCTGGAGCGCGCCACTCATGAGGCCCAAATGAGGGAGGAGCCGTGCAGCTGAAGGGCAGGGGACAGCTGCCAGGAGAGTCAGAGGGCCTCAGAAGTGGCTGAATACTCGGCCAGGCGCAGTGGCTCACGCCCGAAATCCCAGCACTTTGGGAGGCCAAGGCTGGCAGATCACCTGAGGTCAGGAGTTTGAGACCAGCCTGACCAACATGGTGAAACCACG	chr20:35270549-35270869
20	35271088	35271498	35271293	411	35270293	35272293	ENCFF290ESJ.2	123929	35115357	35147364	-	EDEM2	7618	35278911	35284985	-	EIF6	MMP24OS	2	CTCAGGTCCAGTGGGAGAGCC,chr20,+,42,0.70058	CTCAGGTCCAGTGGGAGAGCC	chr20	+	42	0.70058	44561	chr20:35271240-35271260	ACAGTGAGGCTAGGACTCCCTGTTGGGGACCTGGGAGGCAGAAGGTGATGAGGAGGGAGCCCCTCTGTGGTGCAGATGAGGAGCTCTGGGGAGCCAGCCAATGCAGAGCTGCCGGTAGGCCGAGGGAGGTCAGGGTTTCTGGCTCTGCTGCTCAGGTCCAGTGGGAGAGCCTCAGAGTCGGGTGTCACTGGTAGCAGGTTTGGGGAGTGGTAGTGCATATGCAAAGTCATGTAAGTGGCTGAGATCACCAGAGAGGAGAGAGGAGCAAGTCACATGAACAAAAGAGGGTGGGACTCGGAGCCCAGGCAGCAGAGGCAAGTT	chr20:35271090-35271410
20	35275275	35275559	35275417	285	35274417	35276417	ENCFF713ZPE.1	128053	35115357	35147364	-	EDEM2	3494	35278911	35284985	-	EIF6	MMP24OS	5	GCCAGCACGCTGGAGACTGCC,chr20,-,-644,0.76941	GCCAGCACGCTGGAGACTGCC	chr20	-	-644	0.76941	49371	chr20:35276050-35276070	CTGGGACAAGAGATTTTGCTTGAGACAGCTCCCAGGGCAGCAGGAGTCCCTGTCTGTGCTACAGGGTAAGCCGACCCCAATCCCAGAGACCACAGGGTCGGGGGCAAGGCCCATGCAGGCTCAGTGAGCAGGGGTGGCATCCGAGACCCGGCCAGCACGCTGGAGACTGCCTGACACCTTTTTGGCTTTGGCAGAGAGCCAGTGGGCATTGATGAACCCATTGGCCTTGTCTAGGGCTCCTCAGTGACAAGCAGGGCTGCCTCCGCCGTACTGTGGAGCAAGGCAGGCCAAGCCCTAGGAACTCCTGCTGGAGACAGTGAA	chr20:35275900-35276220
20	35275275	35275559	35275417	285	35274417	35276417	ENCFF713ZPE.1	128053	35115357	35147364	-	EDEM2	3494	35278911	35284985	-	EIF6	MMP24OS	5	GACAGCTCCCAGGGCAGCAGG,chr20,-,-771,0.76401	GACAGCTCCCAGGGCAGCAGG	chr20	-	-771	0.76401	49498	chr20:35276177-35276197	GTACAAACCTATGAATCACTAATATCTCCGCAGTTGTTCCCTGCCTGTCCCAGGGAGCCTGCCCTTGGCCAAAATGAGAAAAAACAAGGATGATGACAGGGGACACAGCGGACCCACATGGGCACCTCTGGGACAAGAGATTTTGCTTGAGACAGCTCCCAGGGCAGCAGGAGTCCCTGTCTGTGCTACAGGGTAAGCCGACCCCAATCCCAGAGACCACAGGGTCGGGGGCAAGGCCCATGCAGGCTCAGTGAGCAGGGGTGGCATCCGAGACCCGGCCAGCACGCTGGAGACTGCCTGACACCTTTTTGGCTTTGGCAG	chr20:35276027-35276347
20	35275275	35275559	35275417	285	35274417	35276417	ENCFF713ZPE.1	128053	35115357	35147364	-	EDEM2	3494	35278911	35284985	-	EIF6	MMP24OS	5	TCCAGAAATGGGGTCAGCTTC,chr20,-,-84,0.71944	TCCAGAAATGGGGTCAGCTTC	chr20	-	-84	0.71944	48811	chr20:35275490-35275510	TCCCAGGCTCTGCCAGTGTTGGCCCTGCAGCCATCTCTGCCTCACCTAACTGGTGAGGCTGAGCTCCAGGCTGCAAGTGACAGACTGGAGCAAAGCTGGGGACAGTGACAATAGAGGGGAGTGGAGGACGGTCACAAACTCGGATCTTCCTCCAGAAATGGGGTCAGCTTCTGCCCCAGCTCTGTAGCCATAGGAGCAGAGCTCAGCTACTGGGGTGTCTGGGCGCTAGAGTGGCCTTAGCAGCACCTTGGTCCTTGTCGCCTGGGGGAGGGCCGCTATGCTGGCCTCATCACCAAGACAGTCACCTCTAGTTCACCTAAA	chr20:35275340-35275660
20	35275275	35275559	35275417	285	35274417	35276417	ENCFF713ZPE.1	128053	35115357	35147364	-	EDEM2	3494	35278911	35284985	-	EIF6	MMP24OS	5	AGCAGCACCTTGGTCCTTGTC,chr20,-,4,0.71598	AGCAGCACCTTGGTCCTTGTC	chr20	-	4	0.71598	48723	chr20:35275402-35275422	AGCAAAGCTGGGGACAGTGACAATAGAGGGGAGTGGAGGACGGTCACAAACTCGGATCTTCCTCCAGAAATGGGGTCAGCTTCTGCCCCAGCTCTGTAGCCATAGGAGCAGAGCTCAGCTACTGGGGTGTCTGGGCGCTAGAGTGGCCTTAGCAGCACCTTGGTCCTTGTCGCCTGGGGGAGGGCCGCTATGCTGGCCTCATCACCAAGACAGTCACCTCTAGTTCACCTAAAGCCTCAAGCAGCCTTTGCAAAATGGGACAGTAGTGACAGGACATTTAAATATTCACGATGTGACAGCTGGGTCCTTGTCAGACCCAGC	chr20:35275252-35275572
20	35275275	35275559	35275417	285	35274417	35276417	ENCFF713ZPE.1	128053	35115357	35147364	-	EDEM2	3494	35278911	35284985	-	EIF6	MMP24OS	5	GTGCTCACCAGGGCCAGCAGG,chr20,+,716,0.70663	GTGCTCACCAGGGCCAGCAGG	chr20	+	716	0.70663	48011	chr20:35274690-35274710	CCAGTTCAAGAACAAGACAGGCCCTCAGCCTGTCACCTACTATAAGCGGCCAGTCCAGGAATGGGTGTGAGCAGCCCAGAGCCCTCTCTATCCACTTGGTCTGGCCAGCCAGGCCCTTCCTCACCAGGGTCTGAGGGGCAGCTCTGGCCAGTGCTCACCAGGGCCAGCAGGGCCCTAGGCTGGGGTCGTACAGCTGAAGTGGTGGGTGCATTGGCCTAGGCTGAGCGTGGGGCAGGGAATTATGGGGGCTGTGCCCCAGGGTGGGTGTCTGGCACCCAGCTGCCAGCCTTCTGTCCTGGGCAAACTACTCCCTACTTAAGG	chr20:35274540-35274860
20	35275894	35276178	35276036	285	35275036	35277036	ENCFF713ZPE.2	128672	35115357	35147364	-	EDEM2	2875	35278911	35284985	-	EIF6	MMP24OS	4	GCCAGCACGCTGGAGACTGCC,chr20,-,-25,0.76941	GCCAGCACGCTGGAGACTGCC	chr20	-	-25	0.76941	49371	chr20:35276050-35276070	CTGGGACAAGAGATTTTGCTTGAGACAGCTCCCAGGGCAGCAGGAGTCCCTGTCTGTGCTACAGGGTAAGCCGACCCCAATCCCAGAGACCACAGGGTCGGGGGCAAGGCCCATGCAGGCTCAGTGAGCAGGGGTGGCATCCGAGACCCGGCCAGCACGCTGGAGACTGCCTGACACCTTTTTGGCTTTGGCAGAGAGCCAGTGGGCATTGATGAACCCATTGGCCTTGTCTAGGGCTCCTCAGTGACAAGCAGGGCTGCCTCCGCCGTACTGTGGAGCAAGGCAGGCCAAGCCCTAGGAACTCCTGCTGGAGACAGTGAA	chr20:35275900-35276220
20	35275894	35276178	35276036	285	35275036	35277036	ENCFF713ZPE.2	128672	35115357	35147364	-	EDEM2	2875	35278911	35284985	-	EIF6	MMP24OS	4	GACAGCTCCCAGGGCAGCAGG,chr20,-,-152,0.76401	GACAGCTCCCAGGGCAGCAGG	chr20	-	-152	0.76401	49498	chr20:35276177-35276197	GTACAAACCTATGAATCACTAATATCTCCGCAGTTGTTCCCTGCCTGTCCCAGGGAGCCTGCCCTTGGCCAAAATGAGAAAAAACAAGGATGATGACAGGGGACACAGCGGACCCACATGGGCACCTCTGGGACAAGAGATTTTGCTTGAGACAGCTCCCAGGGCAGCAGGAGTCCCTGTCTGTGCTACAGGGTAAGCCGACCCCAATCCCAGAGACCACAGGGTCGGGGGCAAGGCCCATGCAGGCTCAGTGAGCAGGGGTGGCATCCGAGACCCGGCCAGCACGCTGGAGACTGCCTGACACCTTTTTGGCTTTGGCAG	chr20:35276027-35276347
20	35275894	35276178	35276036	285	35275036	35277036	ENCFF713ZPE.2	128672	35115357	35147364	-	EDEM2	2875	35278911	35284985	-	EIF6	MMP24OS	4	TCCAGAAATGGGGTCAGCTTC,chr20,-,535,0.71944	TCCAGAAATGGGGTCAGCTTC	chr20	-	535	0.71944	48811	chr20:35275490-35275510	TCCCAGGCTCTGCCAGTGTTGGCCCTGCAGCCATCTCTGCCTCACCTAACTGGTGAGGCTGAGCTCCAGGCTGCAAGTGACAGACTGGAGCAAAGCTGGGGACAGTGACAATAGAGGGGAGTGGAGGACGGTCACAAACTCGGATCTTCCTCCAGAAATGGGGTCAGCTTCTGCCCCAGCTCTGTAGCCATAGGAGCAGAGCTCAGCTACTGGGGTGTCTGGGCGCTAGAGTGGCCTTAGCAGCACCTTGGTCCTTGTCGCCTGGGGGAGGGCCGCTATGCTGGCCTCATCACCAAGACAGTCACCTCTAGTTCACCTAAA	chr20:35275340-35275660
20	35275894	35276178	35276036	285	35275036	35277036	ENCFF713ZPE.2	128672	35115357	35147364	-	EDEM2	2875	35278911	35284985	-	EIF6	MMP24OS	4	AGCAGCACCTTGGTCCTTGTC,chr20,-,623,0.71598	AGCAGCACCTTGGTCCTTGTC	chr20	-	623	0.71598	48723	chr20:35275402-35275422	AGCAAAGCTGGGGACAGTGACAATAGAGGGGAGTGGAGGACGGTCACAAACTCGGATCTTCCTCCAGAAATGGGGTCAGCTTCTGCCCCAGCTCTGTAGCCATAGGAGCAGAGCTCAGCTACTGGGGTGTCTGGGCGCTAGAGTGGCCTTAGCAGCACCTTGGTCCTTGTCGCCTGGGGGAGGGCCGCTATGCTGGCCTCATCACCAAGACAGTCACCTCTAGTTCACCTAAAGCCTCAAGCAGCCTTTGCAAAATGGGACAGTAGTGACAGGACATTTAAATATTCACGATGTGACAGCTGGGTCCTTGTCAGACCCAGC	chr20:35275252-35275572
20	35269042	35269362	35269202	321	35268202	35270202	ENCFF896RCP.2	121838	35115357	35147364	-	EDEM2	9709	35278911	35284985	-	EIF6	AL121753.1	2	CCCAAGACCTTGGGCAGGGAA,chr20,-,-734,0.77053	CCCAAGACCTTGGGCAGGGAA	chr20	-	-734	0.77053	43246	chr20:35269925-35269945	TCACCCCACCAATCTCGGCACATACAGATTCTCAGTCTCACTTTCTGACTTGATTTGTCAGAGGTCAGTGTCTCCGTTAGACTAGAGGGGCCCTCTGAGGACATCTGCCTCCCACCCCGCCTCTTCCAGTTTAGATGGGAAAAAGGAGGTCCCAAGACCTTGGGCAGGGAACTGTCCCACAGCACAGTCTACATTACCTTTGAAGAAGACAAATCTCCCATCGGCCCTTTCATAGGCTGCGTCGATGCGGGCAGGCAGGCCCTTCCAGAACTGCTCGATCTGCATGGGGTAGCCCTCCTGCACTCGGTTATTGCGCAGACG	chr20:35269775-35270095
20	35269042	35269362	35269202	321	35268202	35270202	ENCFF896RCP.2	121838	35115357	35147364	-	EDEM2	9709	35278911	35284985	-	EIF6	AL121753.1	2	GCCAGCAGTGTGGCCAGCAGG,chr20,-,900,0.71765	GCCAGCAGTGTGGCCAGCAGG	chr20	-	900	0.71765	41612	chr20:35268291-35268311		chr20:35268141-35268461
20	35269249	35269569	35269409	321	35268409	35270409	ENCFF896RCP.1	122045	35115357	35147364	-	EDEM2	9502	35278911	35284985	-	EIF6	AL121753.1	1	CCCAAGACCTTGGGCAGGGAA,chr20,-,-527,0.77053	CCCAAGACCTTGGGCAGGGAA	chr20	-	-527	0.77053	43246	chr20:35269925-35269945	TCACCCCACCAATCTCGGCACATACAGATTCTCAGTCTCACTTTCTGACTTGATTTGTCAGAGGTCAGTGTCTCCGTTAGACTAGAGGGGCCCTCTGAGGACATCTGCCTCCCACCCCGCCTCTTCCAGTTTAGATGGGAAAAAGGAGGTCCCAAGACCTTGGGCAGGGAACTGTCCCACAGCACAGTCTACATTACCTTTGAAGAAGACAAATCTCCCATCGGCCCTTTCATAGGCTGCGTCGATGCGGGCAGGCAGGCCCTTCCAGAACTGCTCGATCTGCATGGGGTAGCCCTCCTGCACTCGGTTATTGCGCAGACG	chr20:35269775-35270095
20	35269371	35269498	35269442	128	35268442	35270442	ENCFF290ESJ.4	122078	35115357	35147364	-	EDEM2	9469	35278911	35284985	-	EIF6	AL121753.1	1	CCCAAGACCTTGGGCAGGGAA,chr20,-,-494,0.77053	CCCAAGACCTTGGGCAGGGAA	chr20	-	-494	0.77053	43246	chr20:35269925-35269945	TCACCCCACCAATCTCGGCACATACAGATTCTCAGTCTCACTTTCTGACTTGATTTGTCAGAGGTCAGTGTCTCCGTTAGACTAGAGGGGCCCTCTGAGGACATCTGCCTCCCACCCCGCCTCTTCCAGTTTAGATGGGAAAAAGGAGGTCCCAAGACCTTGGGCAGGGAACTGTCCCACAGCACAGTCTACATTACCTTTGAAGAAGACAAATCTCCCATCGGCCCTTTCATAGGCTGCGTCGATGCGGGCAGGCAGGCCCTTCCAGAACTGCTCGATCTGCATGGGGTAGCCCTCCTGCACTCGGTTATTGCGCAGACG	chr20:35269775-35270095
20	35270407	35270817	35270612	411	35269612	35271612	ENCFF290ESJ.1	123248	35115357	35147364	-	EDEM2	8299	35278911	35284985	-	EIF6	AL121753.1	3	CCCAAGACCTTGGGCAGGGAA,chr20,-,676,0.77053	CCCAAGACCTTGGGCAGGGAA	chr20	-	676	0.77053	43246	chr20:35269925-35269945	TCACCCCACCAATCTCGGCACATACAGATTCTCAGTCTCACTTTCTGACTTGATTTGTCAGAGGTCAGTGTCTCCGTTAGACTAGAGGGGCCCTCTGAGGACATCTGCCTCCCACCCCGCCTCTTCCAGTTTAGATGGGAAAAAGGAGGTCCCAAGACCTTGGGCAGGGAACTGTCCCACAGCACAGTCTACATTACCTTTGAAGAAGACAAATCTCCCATCGGCCCTTTCATAGGCTGCGTCGATGCGGGCAGGCAGGCCCTTCCAGAACTGCTCGATCTGCATGGGGTAGCCCTCCTGCACTCGGTTATTGCGCAGACG	chr20:35269775-35270095
20	35270407	35270817	35270612	411	35269612	35271612	ENCFF290ESJ.1	123248	35115357	35147364	-	EDEM2	8299	35278911	35284985	-	EIF6	AL121753.1	3	TGAAGGGCAGGGGACAGCTGC,chr20,+,-98,0.7311	TGAAGGGCAGGGGACAGCTGC	chr20	+	-98	0.7311	44020	chr20:35270699-35270719	GGCCAAGGCTGGAAATTCATGGAATGTTTCCGAGCAGCAGAGAGCCAGAGGGCAGGAGGTGACAGACATGGCAGGGGCAGGGCAGCCATTTCTGAGGTGGTTCTGGAGCGCGCCACTCATGAGGCCCAAATGAGGGAGGAGCCGTGCAGCTGAAGGGCAGGGGACAGCTGCCAGGAGAGTCAGAGGGCCTCAGAAGTGGCTGAATACTCGGCCAGGCGCAGTGGCTCACGCCCGAAATCCCAGCACTTTGGGAGGCCAAGGCTGGCAGATCACCTGAGGTCAGGAGTTTGAGACCAGCCTGACCAACATGGTGAAACCACG	chr20:35270549-35270869
20	35270407	35270817	35270612	411	35269612	35271612	ENCFF290ESJ.1	123248	35115357	35147364	-	EDEM2	8299	35278911	35284985	-	EIF6	AL121753.1	3	CTCAGGTCCAGTGGGAGAGCC,chr20,+,-639,0.70058	CTCAGGTCCAGTGGGAGAGCC	chr20	+	-639	0.70058	44561	chr20:35271240-35271260	ACAGTGAGGCTAGGACTCCCTGTTGGGGACCTGGGAGGCAGAAGGTGATGAGGAGGGAGCCCCTCTGTGGTGCAGATGAGGAGCTCTGGGGAGCCAGCCAATGCAGAGCTGCCGGTAGGCCGAGGGAGGTCAGGGTTTCTGGCTCTGCTGCTCAGGTCCAGTGGGAGAGCCTCAGAGTCGGGTGTCACTGGTAGCAGGTTTGGGGAGTGGTAGTGCATATGCAAAGTCATGTAAGTGGCTGAGATCACCAGAGAGGAGAGAGGAGCAAGTCACATGAACAAAAGAGGGTGGGACTCGGAGCCCAGGCAGCAGAGGCAAGTT	chr20:35271090-35271410
20	35271088	35271498	35271293	411	35270293	35272293	ENCFF290ESJ.2	123929	35115357	35147364	-	EDEM2	7618	35278911	35284985	-	EIF6	AL121753.1	2	TGAAGGGCAGGGGACAGCTGC,chr20,+,583,0.7311	TGAAGGGCAGGGGACAGCTGC	chr20	+	583	0.7311	44020	chr20:35270699-35270719	GGCCAAGGCTGGAAATTCATGGAATGTTTCCGAGCAGCAGAGAGCCAGAGGGCAGGAGGTGACAGACATGGCAGGGGCAGGGCAGCCATTTCTGAGGTGGTTCTGGAGCGCGCCACTCATGAGGCCCAAATGAGGGAGGAGCCGTGCAGCTGAAGGGCAGGGGACAGCTGCCAGGAGAGTCAGAGGGCCTCAGAAGTGGCTGAATACTCGGCCAGGCGCAGTGGCTCACGCCCGAAATCCCAGCACTTTGGGAGGCCAAGGCTGGCAGATCACCTGAGGTCAGGAGTTTGAGACCAGCCTGACCAACATGGTGAAACCACG	chr20:35270549-35270869
20	35271088	35271498	35271293	411	35270293	35272293	ENCFF290ESJ.2	123929	35115357	35147364	-	EDEM2	7618	35278911	35284985	-	EIF6	AL121753.1	2	CTCAGGTCCAGTGGGAGAGCC,chr20,+,42,0.70058	CTCAGGTCCAGTGGGAGAGCC	chr20	+	42	0.70058	44561	chr20:35271240-35271260	ACAGTGAGGCTAGGACTCCCTGTTGGGGACCTGGGAGGCAGAAGGTGATGAGGAGGGAGCCCCTCTGTGGTGCAGATGAGGAGCTCTGGGGAGCCAGCCAATGCAGAGCTGCCGGTAGGCCGAGGGAGGTCAGGGTTTCTGGCTCTGCTGCTCAGGTCCAGTGGGAGAGCCTCAGAGTCGGGTGTCACTGGTAGCAGGTTTGGGGAGTGGTAGTGCATATGCAAAGTCATGTAAGTGGCTGAGATCACCAGAGAGGAGAGAGGAGCAAGTCACATGAACAAAAGAGGGTGGGACTCGGAGCCCAGGCAGCAGAGGCAAGTT	chr20:35271090-35271410
20	35275275	35275559	35275417	285	35274417	35276417	ENCFF713ZPE.1	128053	35115357	35147364	-	EDEM2	3494	35278911	35284985	-	EIF6	AL121753.1	5	GCCAGCACGCTGGAGACTGCC,chr20,-,-644,0.76941	GCCAGCACGCTGGAGACTGCC	chr20	-	-644	0.76941	49371	chr20:35276050-35276070	CTGGGACAAGAGATTTTGCTTGAGACAGCTCCCAGGGCAGCAGGAGTCCCTGTCTGTGCTACAGGGTAAGCCGACCCCAATCCCAGAGACCACAGGGTCGGGGGCAAGGCCCATGCAGGCTCAGTGAGCAGGGGTGGCATCCGAGACCCGGCCAGCACGCTGGAGACTGCCTGACACCTTTTTGGCTTTGGCAGAGAGCCAGTGGGCATTGATGAACCCATTGGCCTTGTCTAGGGCTCCTCAGTGACAAGCAGGGCTGCCTCCGCCGTACTGTGGAGCAAGGCAGGCCAAGCCCTAGGAACTCCTGCTGGAGACAGTGAA	chr20:35275900-35276220
20	35275275	35275559	35275417	285	35274417	35276417	ENCFF713ZPE.1	128053	35115357	35147364	-	EDEM2	3494	35278911	35284985	-	EIF6	AL121753.1	5	GACAGCTCCCAGGGCAGCAGG,chr20,-,-771,0.76401	GACAGCTCCCAGGGCAGCAGG	chr20	-	-771	0.76401	49498	chr20:35276177-35276197	GTACAAACCTATGAATCACTAATATCTCCGCAGTTGTTCCCTGCCTGTCCCAGGGAGCCTGCCCTTGGCCAAAATGAGAAAAAACAAGGATGATGACAGGGGACACAGCGGACCCACATGGGCACCTCTGGGACAAGAGATTTTGCTTGAGACAGCTCCCAGGGCAGCAGGAGTCCCTGTCTGTGCTACAGGGTAAGCCGACCCCAATCCCAGAGACCACAGGGTCGGGGGCAAGGCCCATGCAGGCTCAGTGAGCAGGGGTGGCATCCGAGACCCGGCCAGCACGCTGGAGACTGCCTGACACCTTTTTGGCTTTGGCAG	chr20:35276027-35276347
20	35275275	35275559	35275417	285	35274417	35276417	ENCFF713ZPE.1	128053	35115357	35147364	-	EDEM2	3494	35278911	35284985	-	EIF6	AL121753.1	5	TCCAGAAATGGGGTCAGCTTC,chr20,-,-84,0.71944	TCCAGAAATGGGGTCAGCTTC	chr20	-	-84	0.71944	48811	chr20:35275490-35275510	TCCCAGGCTCTGCCAGTGTTGGCCCTGCAGCCATCTCTGCCTCACCTAACTGGTGAGGCTGAGCTCCAGGCTGCAAGTGACAGACTGGAGCAAAGCTGGGGACAGTGACAATAGAGGGGAGTGGAGGACGGTCACAAACTCGGATCTTCCTCCAGAAATGGGGTCAGCTTCTGCCCCAGCTCTGTAGCCATAGGAGCAGAGCTCAGCTACTGGGGTGTCTGGGCGCTAGAGTGGCCTTAGCAGCACCTTGGTCCTTGTCGCCTGGGGGAGGGCCGCTATGCTGGCCTCATCACCAAGACAGTCACCTCTAGTTCACCTAAA	chr20:35275340-35275660
20	35275275	35275559	35275417	285	35274417	35276417	ENCFF713ZPE.1	128053	35115357	35147364	-	EDEM2	3494	35278911	35284985	-	EIF6	AL121753.1	5	AGCAGCACCTTGGTCCTTGTC,chr20,-,4,0.71598	AGCAGCACCTTGGTCCTTGTC	chr20	-	4	0.71598	48723	chr20:35275402-35275422	AGCAAAGCTGGGGACAGTGACAATAGAGGGGAGTGGAGGACGGTCACAAACTCGGATCTTCCTCCAGAAATGGGGTCAGCTTCTGCCCCAGCTCTGTAGCCATAGGAGCAGAGCTCAGCTACTGGGGTGTCTGGGCGCTAGAGTGGCCTTAGCAGCACCTTGGTCCTTGTCGCCTGGGGGAGGGCCGCTATGCTGGCCTCATCACCAAGACAGTCACCTCTAGTTCACCTAAAGCCTCAAGCAGCCTTTGCAAAATGGGACAGTAGTGACAGGACATTTAAATATTCACGATGTGACAGCTGGGTCCTTGTCAGACCCAGC	chr20:35275252-35275572
20	35275275	35275559	35275417	285	35274417	35276417	ENCFF713ZPE.1	128053	35115357	35147364	-	EDEM2	3494	35278911	35284985	-	EIF6	AL121753.1	5	GTGCTCACCAGGGCCAGCAGG,chr20,+,716,0.70663	GTGCTCACCAGGGCCAGCAGG	chr20	+	716	0.70663	48011	chr20:35274690-35274710	CCAGTTCAAGAACAAGACAGGCCCTCAGCCTGTCACCTACTATAAGCGGCCAGTCCAGGAATGGGTGTGAGCAGCCCAGAGCCCTCTCTATCCACTTGGTCTGGCCAGCCAGGCCCTTCCTCACCAGGGTCTGAGGGGCAGCTCTGGCCAGTGCTCACCAGGGCCAGCAGGGCCCTAGGCTGGGGTCGTACAGCTGAAGTGGTGGGTGCATTGGCCTAGGCTGAGCGTGGGGCAGGGAATTATGGGGGCTGTGCCCCAGGGTGGGTGTCTGGCACCCAGCTGCCAGCCTTCTGTCCTGGGCAAACTACTCCCTACTTAAGG	chr20:35274540-35274860
20	35275894	35276178	35276036	285	35275036	35277036	ENCFF713ZPE.2	128672	35115357	35147364	-	EDEM2	2875	35278911	35284985	-	EIF6	AL121753.1	4	GCCAGCACGCTGGAGACTGCC,chr20,-,-25,0.76941	GCCAGCACGCTGGAGACTGCC	chr20	-	-25	0.76941	49371	chr20:35276050-35276070	CTGGGACAAGAGATTTTGCTTGAGACAGCTCCCAGGGCAGCAGGAGTCCCTGTCTGTGCTACAGGGTAAGCCGACCCCAATCCCAGAGACCACAGGGTCGGGGGCAAGGCCCATGCAGGCTCAGTGAGCAGGGGTGGCATCCGAGACCCGGCCAGCACGCTGGAGACTGCCTGACACCTTTTTGGCTTTGGCAGAGAGCCAGTGGGCATTGATGAACCCATTGGCCTTGTCTAGGGCTCCTCAGTGACAAGCAGGGCTGCCTCCGCCGTACTGTGGAGCAAGGCAGGCCAAGCCCTAGGAACTCCTGCTGGAGACAGTGAA	chr20:35275900-35276220
20	35275894	35276178	35276036	285	35275036	35277036	ENCFF713ZPE.2	128672	35115357	35147364	-	EDEM2	2875	35278911	35284985	-	EIF6	AL121753.1	4	GACAGCTCCCAGGGCAGCAGG,chr20,-,-152,0.76401	GACAGCTCCCAGGGCAGCAGG	chr20	-	-152	0.76401	49498	chr20:35276177-35276197	GTACAAACCTATGAATCACTAATATCTCCGCAGTTGTTCCCTGCCTGTCCCAGGGAGCCTGCCCTTGGCCAAAATGAGAAAAAACAAGGATGATGACAGGGGACACAGCGGACCCACATGGGCACCTCTGGGACAAGAGATTTTGCTTGAGACAGCTCCCAGGGCAGCAGGAGTCCCTGTCTGTGCTACAGGGTAAGCCGACCCCAATCCCAGAGACCACAGGGTCGGGGGCAAGGCCCATGCAGGCTCAGTGAGCAGGGGTGGCATCCGAGACCCGGCCAGCACGCTGGAGACTGCCTGACACCTTTTTGGCTTTGGCAG	chr20:35276027-35276347
20	35275894	35276178	35276036	285	35275036	35277036	ENCFF713ZPE.2	128672	35115357	35147364	-	EDEM2	2875	35278911	35284985	-	EIF6	AL121753.1	4	TCCAGAAATGGGGTCAGCTTC,chr20,-,535,0.71944	TCCAGAAATGGGGTCAGCTTC	chr20	-	535	0.71944	48811	chr20:35275490-35275510	TCCCAGGCTCTGCCAGTGTTGGCCCTGCAGCCATCTCTGCCTCACCTAACTGGTGAGGCTGAGCTCCAGGCTGCAAGTGACAGACTGGAGCAAAGCTGGGGACAGTGACAATAGAGGGGAGTGGAGGACGGTCACAAACTCGGATCTTCCTCCAGAAATGGGGTCAGCTTCTGCCCCAGCTCTGTAGCCATAGGAGCAGAGCTCAGCTACTGGGGTGTCTGGGCGCTAGAGTGGCCTTAGCAGCACCTTGGTCCTTGTCGCCTGGGGGAGGGCCGCTATGCTGGCCTCATCACCAAGACAGTCACCTCTAGTTCACCTAAA	chr20:35275340-35275660
20	35275894	35276178	35276036	285	35275036	35277036	ENCFF713ZPE.2	128672	35115357	35147364	-	EDEM2	2875	35278911	35284985	-	EIF6	AL121753.1	4	AGCAGCACCTTGGTCCTTGTC,chr20,-,623,0.71598	AGCAGCACCTTGGTCCTTGTC	chr20	-	623	0.71598	48723	chr20:35275402-35275422	AGCAAAGCTGGGGACAGTGACAATAGAGGGGAGTGGAGGACGGTCACAAACTCGGATCTTCCTCCAGAAATGGGGTCAGCTTCTGCCCCAGCTCTGTAGCCATAGGAGCAGAGCTCAGCTACTGGGGTGTCTGGGCGCTAGAGTGGCCTTAGCAGCACCTTGGTCCTTGTCGCCTGGGGGAGGGCCGCTATGCTGGCCTCATCACCAAGACAGTCACCTCTAGTTCACCTAAAGCCTCAAGCAGCCTTTGCAAAATGGGACAGTAGTGACAGGACATTTAAATATTCACGATGTGACAGCTGGGTCCTTGTCAGACCCAGC	chr20:35275252-35275572
